1 **Specific gut microbiome members are associated with distinct immune**  
2 **markers in allogeneic hematopoietic stem cell transplantation**

3

4

5 **Anna Cäcilia Masche<sup>1</sup>, Katrine Kielsen<sup>2,3</sup>, Malene Skovsted Cilieborg<sup>4</sup>, Ole Lund<sup>5</sup>,**

6 **Susan Holmes<sup>6</sup>, Frank M. Aarestrup<sup>1</sup>, Klaus Gottlob Müller<sup>2,3</sup>, Sünje Johanna**

7 **Pamp<sup>1\*</sup>**

8

9 <sup>1</sup> Research Group for Genomic Epidemiology, Technical University of Denmark,  
10 Kongens Lyngby, Denmark.

11 <sup>2</sup> Institute for Inflammation Research, Department of Rheumatology and Spine  
12 Disease, Copenhagen University Hospital, Rigshospitalet, Copenhagen, Denmark.

13 <sup>3</sup> Department of Pediatrics and Adolescent Medicine, Copenhagen University  
14 Hospital Rigshospitalet, Copenhagen, Denmark.

15 <sup>4</sup> Comparative Pediatrics and Nutrition, Department of Clinical Veterinary and Animal  
16 Science, University of Copenhagen, Frederiksberg, Denmark.

17 <sup>5</sup> Department of Bio and Health Informatics, Technical University of Denmark,  
18 Kongens Lyngby, Denmark.

19 <sup>6</sup> Department of Statistics, Stanford University, Stanford, USA.

20

21

22 \*Correspondence: [sjpa@food.dtu.dk](mailto:sjpa@food.dtu.dk)

23 Research Group for Genomic Epidemiology, Technical University of Denmark,  
24 Kemitorvet Building 204 Room 102, 2800 Kongens Lyngby, Denmark.

25

26 **Abstract**

27

28 **Background:**

29 Increasing evidence reveals the importance of the microbiome in health and disease  
30 and inseparable host-microbial dependencies. Host-microbe interactions are highly  
31 relevant in patients receiving allogeneic hematopoietic stem cell transplantation,  
32 (HSCT), i.e. a replacement of the cellular components of the patients' immune system  
33 with that of a foreign donor. HSCT is employed as curative immunotherapy for a  
34 number of non-malignant and malignant hematologic conditions, including acute  
35 lymphoblastic leukemia. The procedure can be accompanied by severe side effects  
36 such as infections, acute graft-versus-host disease (aGvHD), and death. Here, we  
37 performed a longitudinal analysis of immunological markers, immune reconstitution  
38 and gut microbiota composition in relation to clinical outcomes in children undergoing  
39 HSCT. Such an analysis could reveal biomarkers, e.g. at the time point prior to HSCT,  
40 that in the future could be used to predict which patients are of high risk in relation  
41 to side effects and clinical outcomes and guide treatment strategies accordingly.

42

43 **Results:**

44 In two multivariate analyses (sparse partial least squares regression and canonical  
45 correspondence analysis), we identified three consistent clusters: (1) High  
46 concentrations of the antimicrobial peptide human beta-defensin 2 (hBD2) prior to  
47 the transplantation in patients with high abundances of *Lactobacillaceae*, who later  
48 developed moderate or severe aGvHD and exhibited high mortality. (2) Rapid  
49 reconstitution of NK and B cells in patients with high abundances of obligate  
50 anaerobes such as *Ruminococcaceae*, who developed no or mild aGvHD and exhibited  
51 low mortality. (3) High inflammation, indicated by high levels of C-reactive protein, in  
52 patients with high abundances of facultative anaerobic bacteria such as  
53 *Enterobacteriaceae*. Furthermore, we observed that antibiotic treatment influenced  
54 the bacterial community state.

55

56 **Conclusions:**

57 We identify multivariate associations between specific microbial taxa, host immune  
58 markers, immune cell reconstitution and clinical outcomes in relation to HSCT. Our  
59 findings encourage further investigations into establishing longitudinal surveillance of  
60 the intestinal microbiome and relevant immune markers, such as hBD2, in HSCT  
61 patients. Profiling of the microbiome may prove useful as a prognostic tool that could  
62 help identify patients at risk of poor immune reconstitution and adverse outcomes,  
63 such as aGvHD and death, upon HSCT, providing actionable information in guiding  
64 precision medicine.

65

66 **Keywords:**

67 Gut microbiota – pediatric cancer – HSCT – 16S rRNA gene profiling – data  
68 integration - immune reconstitution - *Ruminococcaceae* - Human beta-defensin 2 –  
69 acute GvHD - B cells and NK cells

70

## 71 **Background**

72

73 The microbiome has gained increasing attention as a crucial contributor in the course  
74 of various diseases, and as target of treatment [1–3]. A number of complications in  
75 allogeneic hematopoietic stem cell transplantation (HSCT) have recently been  
76 associated with the gut microbiota [4, 5]. HSCT is a curative treatment for various  
77 hematologic diseases including malignancies, such as acute lymphoblastic leukemia  
78 (ALL), as well as non-malignant diseases, such as metabolic disorders and immune  
79 deficiency syndromes [6]. One goal of HSCT is achieving a beneficial graft-versus-  
80 leukemia (GvL) effect where donor-derived T lymphocytes and natural killer cells  
81 target leukemic cells in the recipient [7]. Prior to allogeneic HSCT, the patients undergo  
82 a preparative conditioning regimen involving combinations of chemotherapeutic  
83 agents and total body irradiation (TBI) [8] to eradicate leukemic cells and induce  
84 immunosuppression. Immunosuppressive treatment (both prior to and post HSCT) in  
85 the stem cell recipient prevents a graft-versus-host reaction caused by cytotoxic donor  
86 T lymphocytes that attack healthy cells in the recipient [8]. To limit infectious diseases  
87 due to immunosuppression, the patients are administered broad-spectrum  
88 antibacterial and antifungal compounds. Subsequently, the patients receive a stem  
89 cell graft originating from the bone marrow, peripheral blood or umbilical cord blood  
90 of a human leukocyte antigen (HLA)-matched sibling donor or an unrelated donor (i.e.,  
91 allogeneic HSCT) [9, 10].

92

93 In patients undergoing HSCT, it has been previously observed that there are  
94 associations between the microbiome and clinical outcomes such as acute graft-  
95 versus-host disease (aGvHD) [5, 11, 12] and survival [4, 13]. GvHD after HSCT has been  
96 related to an expansion of the order *Lactobacillales*, especially *Enterococcus* spp. [11]  
97 and *Lactobacillus* spp. [14] and a loss of *Clostridiales* [14]. However, so far few studies  
98 have monitored the microbiome longitudinally [11, 14, 15]. This indicates the need for  
99 more detailed investigations that take temporal monitoring of both the host immune  
100 system and the microbiome into account.

101

102 Several markers of the host immune system, including inflammatory markers (such as  
103 C-reactive protein (CRP) and interleukin 6 (IL-6)) and markers of intestinal toxicity  
104 (such as plasma citrulline), have been studied in HSCT [16, 17]. Potential novel  
105 markers, such as antimicrobial peptides (AMPs), have also been proposed to be  
106 involved in outcomes after HSCT, for example in immunomodulation and regulation  
107 of microbial homeostasis [18]. AMPs, especially defensins such as human beta-  
108 defensin 2 and 3 (hBD2 and hBD3), have previously been found to play a role in some  
109 inflammatory diseases [19, 20]. However, to our knowledge, AMPs have not yet been  
110 employed as markers in the context of HSCT. An interesting research question  
111 remains: How are known and novel markers within the host immune system

112 associated with each other or with changes in the microbiome? A better  
113 understanding about these associations would provide a more holistic insight into the  
114 underlying mechanisms affecting clinical outcomes after HSCT.

115

116 Another crucial factor impacting on complications and clinical outcomes after HSCT is  
117 immune reconstitution. Immune reconstitution involves the essential cellular  
118 components of the adaptive immune system, namely T and B cells, as well as key  
119 cellular components of the innate immune defense, namely natural killer (NK) cells,  
120 monocytes and neutrophils [21]. A microbial influence on immune cell differentiation  
121 has been observed previously, e.g., commensal *Clostridiales* were found to regulate  
122 Treg cell differentiation in the colon [22]. Therefore, an influence of the intestinal  
123 microbiome on immune reconstitution following HSCT is likely, but had not been  
124 investigated prior to this study.

125

126 Here, we monitor both host factors and the intestinal microbiome longitudinally. We  
127 included markers of inflammation (CRP and IL-6) and intestinal toxicity (plasma  
128 citrulline) as well as the antimicrobial peptides (hBD2 and 3), which in the following  
129 sections are collectively referred to as immune markers. To assess the prognostic  
130 potential of immune markers associated with gut microbial dynamics for immune  
131 reconstitution and clinical outcomes after HSCT (aGvHD and survival) in a holistic way,  
132 we implemented multivariate multi-table (also referred to as multi-way) approaches.  
133 This facilitated the integration of a variety of different factors that could influence the  
134 patients' convalescence. We reveal distinct clusters of bacteria associated with sets of  
135 immune markers and clinical outcomes. Patients with rapid NK and B cell  
136 reconstitution that had no or mild aGvHD and low mortality exhibited high  
137 abundances of members belonging to the family of *Ruminococcaceae*. In contrast,  
138 patients with moderate to severe aGvHD and high mortality showed high plasma  
139 concentrations of the antimicrobial peptide hBD2 already prior to HSCT. In these  
140 patients, we observed increased *Lactobacillaceae* abundances.

141

142

## 143 **Results**

144

145 To assess associations between immune markers and gut microbial dynamics in the  
146 context of immune reconstitution and clinical outcomes after HSCT, we monitored 37  
147 children over time undergoing allogeneic HSCT (Figure 1A, Additional file 1: Table S1).  
148 We gained insight into the patients' immune reconstitution by determining T, B, NK,  
149 monocyte, and neutrophil cell counts in peripheral blood (Figure 1A, Additional file 1:  
150 Table S1). We measured C-reactive protein (CRP) and plasma interleukin 6 (IL-6) as  
151 markers of inflammation, and human beta-defensin 2 and 3 (hBD2 and 3) as markers  
152 for potential innate immune activation and systemic infection (Figure 1A, Additional



153 file 1: Table S1). Plasma citrulline levels were measured as a marker of intestinal  
154 toxicity, being produced selectively by functioning enterocytes. To relate immune  
155 marker levels to members of the intestinal microbiota in patients undergoing HSCT,  
156 we characterized the longitudinal dynamics of the human intestinal microbiome in a  
157 subset of 30 patients by utilizing 16S rRNA gene profiling (Figure 1A).

158

### 159 **Patient cohort and outcomes**

160 At the time of HSCT, the 37 patients were on average 8.2 years old (age range 1.1 -  
161 18.0 years). Twenty-five patients (68%) were diagnosed with at least one bacterial  
162 infection at median 75 days post HSCT (range: day -19 to +668). Twenty-six patients  
163 (70%) had no or mild aGvHD (grade 0-I) (Additional file 1: Table S1). Eleven patients  
164 (30%) developed moderate to severe aGvHD (grade II, III or IV) at median 18 days  
165 (range: day +9 to +45) after transplantation (Additional file 1: Table S1). Seven patients  
166 (19%) died during the follow-up period at median 266 days post HSCT (range: day +9  
167 to +784) (5 relapse-related and 2 treatment-related deaths) (Additional file 1: Table  
168 S1). In total, six patients (16%) relapsed, four of which underwent a re-transplantation.  
169 All patients received antibiotics pre- and post-transplantation (Additional file 1: Table  
170 S1). Prophylactic trimethoprim-sulfamethoxazole was administered to all patients  
171 from day -7 until transplantation. During the period of neutropenia or latest from day  
172 -1, patients received prophylactic intravenous ceftazidime. In case of infections  
173 indicated by fever or microbial culture, ceftazidime was substituted by intravenous  
174 meropenem, vancomycin or other antibiotics, according to culture-based results.

175

### 176 **Temporal dynamics of immune markers and the intestinal microbiota in HSCT** 177 **patients**

178 Prior to assessing the interplay between clinical variables (i.e., immune markers,  
179 immune reconstitution, clinical outcomes) and the intestinal microbiota, we  
180 characterized these components separately. In order to provide an overview of  
181 changes in immune markers and immune cell counts after HSCT in our cohort ( $n=37$ ),  
182 we assessed their temporal patterns (Figures 1B, 1C, and Additional file 2: Figure S1).  
183 Of note, these supplemental univariate analyses mainly serve the purpose of visually  
184 aiding our subsequent multivariate analyses approaches (Additional file 3: Figure S2).  
185 We characterized hBD2 for the first time in the context of HSCT by assessing plasma  
186 hBD2 concentrations over time from pre-HSCT to month +3 post HSCT in patients  
187 compared to healthy controls. The hBD2 concentration differed significantly between  
188 time points ( $P < 0.001$ , Kendall's  $W = 0.6$ ). It increased from pre-HSCT to the day of  
189 HSCT ( $P < 0.001$ ), then slightly decreased in week +1 ( $P = 0.038$ ) before increasing again  
190 in week +3 ( $P = 0.006$ ). HBD2 decreased again in month +2 ( $P = 0.014$ ) (Figure 1B). CRP  
191 levels differed significantly between time points ( $P < 0.001$ , Kendall's  $W = 0.33$ ). They  
192 were high pre-HSCT and until week +2, then decreasing significantly in week +3 ( $P <$   
193  $0.001$ ) with the lowest levels in weeks +4 to +6 ( $P < 0.001$ ) (Additional file 2: Figure

194 S1A). Median plasma citrulline levels were significantly different between time points  
195 ( $P < 0.001$ , Kendall's  $W = 0.32$ ). They decreased from pre-HSCT to week +1 ( $P < 0.001$ )  
196 and increased again in week +3 ( $P < 0.001$ ) (Additional file 2: Figure S1A). B cell counts  
197 (Kendall's  $W = 0.5$ ) as well as CD4+ T cell counts (Kendall's  $W = 0.46$ ) increased steadily  
198 from month +1 to month +6 ( $P < 0.001$ ) (Additional file 2: Figure S1B).

199

200 To gain insight into intestinal microbial dynamics before, at the time of, and after  
201 HSCT, we obtained a total of 97 fecal samples from a subcohort of 30 patients. Using  
202 16S rRNA gene sequence analysis, we identified 239 operational taxonomic units  
203 (OTUs) (see Methods). Microbial alpha-diversity was lower at all time points post-  
204 HSCT compared to pre-HSCT (Figure 1B). The median inverse Simpson index decreased  
205 from 3.27 (range: 1.02 – 7.4) before HSCT to 2.89 (range: 1.04 - 10.77) on the day of  
206 transplantation and further to 2.03 (range: 1.0 – 16.51) post-HSCT (median of week  
207 +1 to +5). *Enterococcaceae* (*Firmicutes*) was the most abundant bacterial family  
208 observed, followed by other *Firmicutes*, such as three families from the class of *Bacilli*  
209 (*Lactobacillaceae*, *Streptococcaceae*, *Staphylococcaceae*), two families from the class  
210 of *Clostridia* (*Lachnospiraceae*, *Ruminococcaceae*), a family within the class of  
211 *Erysipelotrichia* (*Erysipelotrichaceae*) and a family within the class of gamma-  
212 *Proteobacteria* (*Enterobacteriaceae*) (Figure 1C).

213

#### 214 **Associations between immune markers and immune cell reconstitution in HSCT** 215 **patients**

216 In order to identify patient baseline parameters and clinical outcomes (e.g. aGvHD,  
217 relapse, overall survival), as well as immune markers and immune cell types that might  
218 be important determinants in HSCT in relation to the microbiome, we performed  
219 variable assessment by permutational multivariate analysis of variance (adonis). The  
220 variables that were found to be significant ( $P \leq 0.05$ ), i.e., those that explained most  
221 variation in the microbial community distance matrix, were selected for subsequent  
222 analyses (Additional file 3: Figure S2, Additional file 4: Table S2). Of note, the  
223 occurrence of relapse as an indication of transplantation outcome was assessed but  
224 not found to be significant in adonis and was therefore not included in follow-up  
225 analyses. We then assessed associations of the selected immune markers and immune  
226 cells in the data set comprising 37 patients by determining Spearman's rank  
227 correlations. The hBD2 concentrations pre-HSCT, on the day of HSCT and in weeks +1  
228 and +2 post-HSCT were positively correlated with each other ( $\rho = 0.73 - 1$ ,  $P < 0.001$ )  
229 (Figure 2A). NK cell counts in month +1 exhibited a positive correlation with total B  
230 cell counts ( $\rho = 0.64$ ,  $P = 0.0046$ ) and mature B cells counts ( $\rho = 0.62$ ,  $P = 0.0114$ ) in  
231 month +2. When we related immune cell reconstitution to outcomes, we observed  
232 significantly higher NK cell counts and total B cell counts in month +2 in patients with  
233 no or mild aGvHD (grade 0-I) compared with patients with moderate to severe aGvHD  
234 (grade II-IV) (Wilcoxon rank sum test, NK cells,  $P = 0.011$ ; B cells,  $P < 0.001$ ) (Figure 2B).

235

236 **High plasma hBD2 and monocytes prior to HSCT in patients with high**

237 ***Lactobacillaceae***

238 To gain insight into how the selected immune markers and immune cell counts co-  
239 vary with gut microbial abundances in patients with distinct outcomes, we  
240 implemented two multivariate multi-table approaches for the subcohort ( $n=30$ ),  
241 namely sparse partial least squares (sPLS) regression and canonical correspondence  
242 analysis (CCpNA). The sPLS regression models OTU abundances as predictors and  
243 clinical variables as response variables and explains the latter in an asymmetric (i.e.  
244 unidirectional) way. In contrast, the CCpNA assesses relationships between  
245 parameters of the immune system and microbiota bidirectionally. In the following  
246 paragraphs, the results of these two analyses are reported for one observed cluster at  
247 a time, respectively.

248

249 First, we performed sPLS regression to reveal multivariate correlation structures  
250 between immune markers, immune cell counts, and OTU abundances, modeling the  
251 latter as explanatory variables. The sPLS regression and subsequent hierarchical  
252 clustering suggested that the data separated into three clusters (Figure 3A). High  
253 monocyte counts and high plasma hBD2 concentration prior to HSCT, high patient age  
254 at the time of transplantation, and high abundances of *Lactobacillaceae* independent  
255 of time point contributed the most to the formation of cluster 1. Of note, monocyte  
256 counts and hBD2 were positively correlated with each other, in agreement with the  
257 correlation analysis above (Figure 2A). The *Lactobacillaceae* were represented by  
258 microaerophilic *Lactobacillus* sp. OTUs (e.g., AF413523.1, GU451064.1, KF029502.1)  
259 (Figure 3B, Additional file 5: Table S3). These OTUs exhibited high loading weights in  
260 sPLS dimension 2 (Figure 3C), indicating that they contributed strongly to the  
261 separation of clusters in dimension 2 (Figure 3A and 3B).

262

263 Second, we applied CCpNA to model the canonical relationships between OTU  
264 abundances and clinical variables through the construction of common “latent”  
265 variables. The CCpNA confirmed the separation of the data into three clusters as  
266 observed in the sPLS regression (Figures 3A, 4, and Additional file 6: Figure S3A),  
267 including the clustering of OTUs. In addition, the CCpNA facilitated the inclusion of  
268 categorical variables, such as the patients’ baseline parameters (e.g., recipient sex,  
269 donor type) and clinical endpoints (aGvHD grade, overall survival). Because CCpNA  
270 is an unsupervised method and upheld the results of the sPLS regression, it provides  
271 confidence in the cluster findings.

272

273

274 Cluster 1 in the CCpNA seemed to include patients who developed moderate to severe  
275 aGvHD (grade II - IV) and who died. As suggested by both, sPLS and CCpNA, these

276 patients exhibited high levels of plasma hBD2 before HSCT (and in week +1 and +2)  
277 and high monocyte counts before HSCT. OTUs within this CCpnA cluster  
278 predominantly included members of the family *Lactobacillaceae* and were most  
279 abundant in fecal samples of these patients (Figure 4 and Additional file 7: Figure S4).  
280 OTUs that were assigned to cluster 1 by the sPLS-based hierarchical clustering were  
281 congruently associated with the same clinical variables in the CCpnA (Figures 3B and  
282 4).

283

#### 284 **Temporal patterns of the *Lactobacillaceae*-dominated community state type**

285 Upon revealing an association between high plasma hBD2 concentrations and  
286 monocyte counts prior to HSCT, moderate to severe aGvHD, and high mortality with  
287 high abundances of *Lactobacillaceae* in multivariate analyses, we assessed in more  
288 detail the importance of longitudinal changes in these components. We implemented  
289 an additional approach to identify distinct bacterial community patterns by employing  
290 partitioning around medoid (PAM) clustering (see Methods). In this analysis, we  
291 detected four community state types (CSTs). Dominating taxa, similar to those  
292 identified by the sPLS-based hierarchical clustering, were revealed in the CSTs, e.g.,  
293 *Lactobacillaceae* members dominated CST 1 (Additional file 5: Table S3 and Additional  
294 file 8: Figure S5). We then used this information to examine temporal community state  
295 changes in individual patients, i.e., their transitions between CSTs over the course of  
296 time (Figure 5). Based on clinical outcomes, the patients can be divided into four  
297 groups: 1. Patients who developed no or mild aGvHD (aGvHD grade 0-I) and survived  
298 compared to 2. Patients who died, and 3. Patients who developed moderate to severe  
299 aGvHD (grade II-IV) and survived compared to 4. Patients who died (Figure 5). We  
300 observed that 6 out of 8 patients (75%) with moderate to severe aGvHD (groups 3 and  
301 4) harboured the *Lactobacillaceae*-dominated CST 1 at least once during the  
302 monitored period (1x:  $n=2$ , 2x:  $n=2$ , 3x:  $n=2$ ) (Figure 5). In comparison, only 5 out of  
303 22 patients (23%) with aGvHD grade 0-I (groups 1 and 2) carried CST 1 one or two  
304 times (Figure 5). Interestingly, high abundances of *Lactobacillaceae* in patients with  
305 aGvHD grade II-IV (groups 3 and 4) occurred predominantly at late time points (week  
306 +1 and later) (Figure 5 and Additional file 7: Figure S4).

307

#### 308 **Temporal association of *Lactobacillaceae* with aGvHD and immune markers**

309 To relate temporal changes in immune markers to those in the bacterial community  
310 composition in patients with aGvHD grade II-IV who died (group 4), we assessed their  
311 individual longitudinal profiles (Figure 6). In all three patients (P24, P26, P30), a large  
312 expansion of *Lactobacillaceae* abundances after the onset of aGvHD was observed.  
313 The average relative abundance of *Lactobacillaceae* after aGvHD onset was 72.92%  
314 (range 0.22 – 97.04%), as compared to before aGvHD (average 9.88%, range 0.25 –  
315 37.83%) (Figure 6). Furthermore, bacterial alpha diversity was lower at the time point  
316 after aGvHD onset compared to the time point before (Figure 6). All three patients

317 were treated with antibiotics for different durations between these two time points  
318 and prior to the time point before aGvHD onset.

319

320 In agreement with the results of the multivariate analyses, two of the patients (P24  
321 and P26) exhibited between 1.95 and 14.56 times higher plasma hBD2 concentrations  
322 for all measured time points compared with the average of the whole data set  
323 (average plasma hBD2 concentration: 10,983.9 pg/ml, range: 0-177,400.28 pg/ml).  
324 The plasma hBD2 concentration was the highest at the time of HSCT in patient P26  
325 and before HSCT in patient P24 (Figure 6). Of note, patient P24 received  
326 corticosteroid-based GvHD prophylaxis prior to HSCT and both patients received  
327 antithymocyte globulin as part of their conditioning regimen. These two patients had  
328 underlying malignant diseases and their pre-HSCT CRP levels, providing insight into  
329 underlying inflammation, were 1.6 times lower and 1.29 times higher compared with  
330 the average of the whole data set on that time point (average plasma CRP  
331 concentration before HSCT: 19.21 mg/L, range: 1 – 60.36 mg/L), respectively.  
332 Monocyte counts before HSCT, i.e., recipient-derived cells, were 6.25 times higher in  
333 patient P24 compared with the average of the whole data set (average monocyte  
334 count before HSCT:  $0.45 \times 10^9/L$ , range:  $0.08 - 2.83 \times 10^9/L$ ) and close to average in  
335 patient P26. In both patients, monocyte counts were higher before (i.e., recipient-  
336 derived cells) than after HSCT (i.e., donor-derived cells) (Figure 6).

337

338 In contrast to the *Lactobacillaceae* expansion after aGvHD onset in group 4, we  
339 observed high *Lactobacillaceae* abundances already before aGvHD onset in three  
340 survivors (P16, P22 and P29) who developed aGvHD grade II-IV (group 3) (Additional  
341 file 9: Figure S6). The average relative abundance of *Lactobacillaceae* before aGvHD  
342 onset was 53.18% (range 0.35 – 98.86%), as compared to after aGvHD (average  
343 18.25%, range 0 – 54.78%). However, these observations were limited by a small  
344 number of patients per outcome group (groups 3 and 4) (Figure 5) and therefore  
345 cannot serve to provide statistical evidence.

346

#### 347 **High NK and B cells and no or mild aGvHD in patients with high obligate anaerobes** 348 **such as *Ruminococcaceae***

349 The association between NK and total B cell counts after HSCT observed in the  
350 Spearman's correlation analysis (Figure 2) was supported by the multivariate analyses  
351 (Figures 3 and 4). In the sPLS regression, cluster 2 included high NK cell counts in  
352 months +1 and +2, as well as high immature, mature, and total B cell counts in month  
353 +2 (Figure 3A). Furthermore, NK and B cell counts were positively correlated with  
354 OTUs found in cluster 2 (Figure 3A and B), in particular with members of the family  
355 *Ruminococcaceae* (Order: *Clostridiales*) (Figure 3B, Additional file 5: Table S3). Strong  
356 positive correlations between mature and total B cell counts in month +2 and NK cell  
357 counts in month +1 were observed, for example, with *Faecalibacterium sp.*



358 (DQ804549.1) (Figures 3B and 3C, Additional file 5: Table S3). Additionally, we  
359 observed positive associations of these immune cells with *Lachnospiraceae* (Order:  
360 *Clostridiales*), among those two *Blautia* spp. (DQ800353.1 and DQ802363.1) (Figures  
361 3B and 3C, Additional file 5: Table S3).

362

363 In support of the sPLS regression, the CCpna also revealed high NK and B cell counts  
364 in cluster 2 in months +1 and +2. Based on the CCpna, we found that NK and B cell  
365 reconstitution was associated with certain disease outcomes. For example, patients  
366 who had no or mild aGvHD and survived were predominantly represented in cluster  
367 2. Cluster 2 included OTUs mainly belonging to *Ruminococcaceae* and  
368 *Lachnospiraceae*, exhibiting their highest abundances in patient samples associated  
369 with this cluster. OTUs with the highest scores in dimension 2 predominantly belonged  
370 to the family of *Ruminococcaceae* and matched the sPLS-based hierarchical cluster  
371 assignment (Figure 4).

372

373 As all patients received antibiotic treatment prior to and post transplantation, we  
374 examined the potential effect of antibiotics on the intestinal bacterial community  
375 composition. A trending influence of the vancomycin treatment was revealed by  
376 adonis analysis ( $P = 0.055$ ). Using a CCpna model that also included information about  
377 antibiotic treatments, we found that patients exhibited higher abundances of  
378 *Ruminococcaceae* and *Lachnospiraceae* and lower abundances of *Enterobacteriaceae*  
379 at time points without the vancomycin treatment compared to with vancomycin  
380 (Additional file 6: Figure S3B). The same pattern was observed for treatment with  
381 ciprofloxacin (Additional file 6: Figure S3B).

382

383 Community state typing also revealed a state type dominated by *Ruminococcaceae*  
384 and *Lachnospiraceae* family members (CST 2) (Additional file 8: Figure S5). A total of  
385 10 out of 22 patients (45%) with no or mild aGvHD were assigned to CST 2 at least at  
386 one time point (1x:  $n=6$ , 2x:  $n=3$ , 3x:  $n=1$ ) (Figure 5). Half of the patients (4 out of 8)  
387 with moderate or severe aGvHD were also assigned to CST 2 once, but only at the time  
388 point before transplantation (Figure 5). That is, a *Ruminococcaceae*- and  
389 *Lachnospiraceae*-dominated community only persisted in patients with no or mild  
390 aGvHD.

391

### 392 **Persistence of *Enterococcaceae*-dominated community state type**

393 A subcluster of cluster 2 comprised two facultative anaerobe *Enterococcus* spp.  
394 (GQ1330038.1 and AJ272200.1), exhibiting positive correlations with high NK and B  
395 cell counts (Figure 3B) and contributing to the separation of the clusters (Figure 3C).  
396 *Enterococcaceae* was the most abundant family in the overall study population (Figure  
397 1D), and community state typing revealed a state type predominantly characterized  
398 by *Enterococcaceae* (CST 4, Additional file 8: Figure S5). A total of 9 out of 22 patients

399 (41%) with no or mild aGvHD were assigned to CST 4 at least at one time point (1x:  
400  $n=2$ , 2x:  $n=2$ ,  $\geq 3$ x:  $n=5$ ) and this *Enterococcaceae*-dominated CST often persisted in the  
401 patient over time (Figure 5). A quarter of the patients (2 out of 8, both survivors) with  
402 moderate or severe aGvHD were assigned to CST 4 at least at one time point on the  
403 day of or post-HSCT (Figure 5).

404

#### 405 **High inflammation in patients with high facultative anaerobic bacteria**

406 In multivariate analyses, OTUs belonging to facultative anaerobic *Enterobacteriaceae*  
407 and *Staphylococcaceae* were characteristic for sPLS cluster 3 (Figures 3A and 3B,  
408 Additional file 5: Table S3). Cluster 3 was further comprised of high plasma citrulline  
409 concentrations pre-HSCT (before conditioning) and week +1, high monocyte counts in  
410 week +3, high CD4+ T cell counts in month +2, high CRP levels, particularly in weeks  
411 +1, +5, and +6 (Figures 3A and 3B). The projection of the variables in the sPLS  
412 suggested a weak positive correlation between these clinical variables in dimension 1  
413 (Figure 3A). However, a weak negative association between CRP levels and monocytes  
414 (week +3) as well as citrulline and CD4+ T cell counts is indicated in dimension 2 (Figure  
415 3A), which is in agreement with some results of the Spearman's rank correlation tests  
416 (Figure 2).

417

418 The clinical variables in cluster 3, in particular high CRP levels post HSCT, exhibited  
419 positive correlations with the OTUs predominantly affiliated with *Proteobacteria* (e.g.,  
420 *Enterobacteriaceae*), *Bacteroidetes*, and *Staphylococcus* spp. (Figure 3B, Additional  
421 file 5: Table S3). The strongest positive correlations occurred with several facultative  
422 anaerobe bacteria, e.g., *Enterobacter* sp. LCR81 (FJ976590.1), *Escherichia coli*  
423 (FJ950694.1) and *Staphylococcus* sp. (JF109069.1). The CCpNA supported observations  
424 from the sPLS regression regarding cluster 3, but indicated that they were only  
425 represented by a few patient samples (Figure 4 and Additional file 6: Figure S3A).  
426 These samples were characterized by high CRP levels, especially in week +1, +5, and  
427 +6. High CRP levels at these time points were not associated with aGvHD grade, i.e.  
428 they were not higher in patients with either aGvHD grade 0-I, or grade II-IV. OTUs of  
429 cluster 3, i.e., members of *Enterobacteriaceae* and *Staphylococcaceae*, exhibited their  
430 highest abundances in samples of this cluster (Figure 4 and Additional file 6: Figure  
431 S3A). Of note, patients represented in cluster 3 were younger compared to those in  
432 the other two clusters (Figure 4).

433

434

#### 435 **Discussion**

436 The human immune system and host-associated microorganisms are closely  
437 interlinked and play central roles in health and disease. The underlying components  
438 and mechanisms facilitating interactions between the immune system and  
439 microorganisms are however not completely understood. Understanding these



440 associations is particularly relevant in patients that receive components of a “foreign”  
441 immune system, such as in patients undergoing allogeneic HSCT. Because both the  
442 patients’ immune system and microbiome appears severely affected, they potentially  
443 jointly impact on clinical outcomes. Here, we perform an integrated analysis of  
444 immune markers, immune reconstitution data, clinical outcomes, and microbiota, and  
445 we provide evidence for the association between specific microbial taxa, host immune  
446 markers, immune cells and clinical outcomes.

447

448 We observed that a predominance of *Clostridiales*, represented by *Ruminococcaceae*  
449 and *Lachnospiraceae*, in the intestine did not persist after transplantation in patients  
450 who either developed aGvHD grade II-IV, died, or both. *Clostridiales* are common  
451 colonizers of the healthy distal gut [23], and their loss is associated with microbial  
452 community disruption, reduced diversity, and GvHD [14]. A low diversity before  
453 conditioning and at the time of engraftment is associated with increased mortality [4,  
454 5], in line with our findings.

455 In addition, in our multivariate analyses we observed high plasma hBD2 levels before  
456 HSCT and in weeks +1 and +2 post HSCT in patients who developed aGvHD grade II-IV,  
457 died, or both. The reason for the high hBD2 levels before HSCT in patients with  
458 increased mortality and GvHD is unknown at present. One could speculate that it  
459 relates to a higher burden of inflammation before and during the first two weeks post-  
460 transplantation. This was also reflected in higher counts of (recipient-derived)  
461 monocytes pre-HSCT that, by secreting hBD2, might contribute to an inflammatory  
462 reaction and thereby a potentially higher risk of aGvHD after HSCT. High hBD2  
463 concentrations in weeks +1 and +2 could be an indicator for an innate immune  
464 reaction involving donor-derived cells, for example, against opportunistic pathogens  
465 that may have translocated to the bloodstream [24]. This might have been promoted  
466 by the decrease in *Ruminococcaceae* and *Lachnospiraceae* abundances in these  
467 patients after HSCT, indicating a microbial community disruption. Plasma hBD2  
468 concentrations were characterized for the first time here in HSCT patients, and our  
469 findings emphasize the importance for further investigations to exploit the potential  
470 of hBD2 as a novel candidate marker for outcomes after HSCT. Importantly, our data  
471 suggested that differences in hBD2 secretion levels between patients were highly  
472 dependent on both, the microbial community composition and the time point relative  
473 to HSCT. We suggest that further investigations take into account variations of  
474 microbial community patterns and temporal changes when assessing hBD2 in the  
475 HSCT context. Moreover, these findings may be refined with a sampling time point  
476 homogeneity that is higher than what we provide in this study.

477

478 An interesting observation was that high pre-HSCT hBD2 levels and monocyte counts  
479 were associated with high abundance of *Lactobacillaceae* independent of time point.  
480 Probiotic *Lactobacillus* spp. have previously been shown to enhance hBD2-secretion

481 in immune cells, thereby contributing to the innate immune defense [25, 26]. This  
482 mechanism could play a protective role during blood stream infections by  
483 opportunistic pathogens in HSCT patients. The increase of *Lactobacillaceae*  
484 abundances, particularly after the onset of aGvHD in patients who died, may be  
485 explained by a previously proposed compensatory mechanism to reduce aGvHD  
486 severity after onset in mice and humans [14]. For instance, high abundances of  
487 *Lactobacillaceae* could indicate homeostasis in the gut microbiome of children and  
488 thereby prevent inflammation caused by opportunistic pathogen expansion [27, 28].  
489 Reduced intestinal inflammation might then benefit the outcome of aGvHD. This  
490 might however also lead to a less effective graft-versus-leukemia (GvL) effect as  
491 suggested by the finding that all patients, for which we observed moderate to severe  
492 aGvHD and subsequent increased *Lactobacillaceae* post HSCT, overcame aGvHD, but  
493 died following a relapse. Only a few patients in our study represented this  
494 combination of outcomes (moderate to severe aGvHD with subsequent increase of  
495 *Lactobacillaceae* and death), therefore no significant conclusion can be drawn at this  
496 point and further studies are needed to address these observations in more detail.  
497 We provide a discussion on survival following high *Lactobacillaceae* abundances prior  
498 to the onset of aGvHD in Additional file 10: Supplementary discussion.

499  
500 In contrast to patients with moderate to severe aGvHD, we observed a higher overall  
501 survival in patients with no or mild aGvHD in multivariate analyses. The latter patients  
502 also had increased numbers of NK and B cells. In agreement with our study, previous  
503 studies have shown slower NK cell reconstitution after HSCT in patients with moderate  
504 to severe aGvHD compared to those with no or mild aGvHD [29]. Moreover, our  
505 results are in agreement with the previously described association of low NK cell  
506 numbers after HSCT and reduced overall survival [30], in line with NK cells' crucial role  
507 in the GvL effect [7]. A poor recovery of B cells has been found to pose an increased  
508 risk of late infections [31], which might be an explanation for the association of high B  
509 cell counts and lower survival. The lower B cell numbers we observed in patients with  
510 more severe aGvHD could partially be a consequence of aGvHD or the treatment with  
511 corticosteroids, which is known to reduce the number of B cell precursors [21, 29].  
512 However, based on our findings, the intestinal microbiota could also play a  
513 contributing role, because faster NK and B cell reconstitution as well as lower aGvHD  
514 severity, and higher overall survival were associated with high abundances of obligate  
515 anaerobes belonging to *Ruminococcaceae* and *Lachnospiraceae*. Indeed, decreased  
516 abundances of these bacterial families have previously been associated with an overall  
517 microbial disruption and decreased diversity [5, 15, 32]. In line with our observations,  
518 reduced microbial diversity was shown to contribute to lower survival [4] and a  
519 reduction of *Clostridiales* was observed in patients presenting aGvHD [33].  
520 Furthermore, in melanoma patients, a low diversity and decreased *Ruminococcaceae*  
521 abundance were associated with a poor response to immunotherapy [34]. A potential

522 explanation for this association could be that members of the order *Clostridiales* can  
523 downregulate inflammation and might thereby prevent aGvHD. Anti-inflammatory  
524 components produced by *Clostridiales* include, for example, urinary 3-indoxyl sulfate  
525 (3-IS) [35] and butyrate [36]. Acute GvHD might also reinforce microbial community  
526 disruption, as it is known to be accompanied by a reduction of Paneth cell numbers in  
527 the intestine. Paneth cells are secretors of  $\alpha$ -defensins, important modulators of gut  
528 microbial homeostasis [37].

529

530 In contrast to the patient group with high abundances of obligate anaerobic bacteria  
531 (e.g., *Ruminococcaceae* and *Lachnospiraceae*), patients with high abundances of  
532 facultative anaerobic bacteria (e.g., *Enterobacteriaceae*, *Staphylococcus* spp., and  
533 *Streptococcus* spp.), showed slow NK and B cell reconstitution. An increase in  
534 facultative anaerobic bacteria has previously been observed in the gut microbiome of  
535 HSCT recipients before the start of conditioning compared with donors [5]. Here, we  
536 additionally observed high levels of C-reactive protein (CRP), indicating high  
537 inflammation in these patients. A possible explanation for this association might  
538 involve the shift to microbial growth conditions that favor facultative anaerobic  
539 bacteria during intestinal inflammation, such as an increased availability of oxygen  
540 caused by inflammatory products [38]. Our multivariate analyses indicated that the  
541 patients in which we observed these associations were younger compared to the rest  
542 of the cohort. Therefore, one could speculate that an immature intestinal microbiome  
543 might exhibit a higher susceptibility to opportunistic growth of facultative anaerobic  
544 bacteria. Further investigations will have to elucidate this relation and its potential  
545 consequences for adjustments of monitoring and treatment by age.

546 We provide a discussion on our findings regarding associations of adverse outcomes  
547 with *Enterococcus* compared with previous studies in Additional file 10:  
548 Supplementary discussion.

549

550 Antimicrobial treatment of patients can significantly affect the gut microbiota,  
551 especially in children [39]. Early use of antibiotics in general has been found to reduce  
552 *Clostridiales* in the intestine of HSCT patients [40]. Furthermore, a link of high total  
553 amounts of antibiotic in GvHD development has been observed in pediatric stem cell  
554 recipients [41]. However, to our knowledge, the effects of specific antibiotics on the  
555 intestinal microbiome especially in pediatric HSCT patients have not yet been  
556 elucidated in detail. Here, we identified a number of specific antibiotics, including  
557 vancomycin and ciprofloxacin, associated with simultaneous reduction of *Clostridiales*  
558 (in particular *Ruminococcaceae* and *Lachnospiraceae*), similar to what has previously  
559 been observed in adult patients [42]. Most interestingly, we found that treatment with  
560 vancomycin and ciprofloxacin was not only associated with reduced *Clostridiales*, but  
561 also with increased abundances of facultative anaerobic bacteria, e.g.,  
562 *Enterobacteriaceae* (gamma-Proteobacteria). Vancomycin-treatment in a cohort of

563 rheumatoid arthritis patients was previously shown to be associated with an  
564 expansion of *Proteobacteria* [43]. The use of a prophylactic ciprofloxacin treatment to  
565 prevent chemotherapy- and transplantation-related bloodstream infections is an  
566 established method [44], and it was proposed that fluoroquinolones (the antibiotic  
567 class comprising ciprofloxacin) can prevent intestinal domination of *Proteobacteria* in  
568 HSCT patients [15]. However, ciprofloxacin treatment in healthy subjects has been  
569 associated with decreased microbial diversity and decreased *Ruminococcaceae* and  
570 *Lachnospiraceae* abundances [45], indicating microbial community disruption.  
571 Therefore, our findings further challenge the choice of antibiotics, such as vancomycin  
572 and ciprofloxacin, in patients undergoing chemotherapy and HSCT. Interestingly, in  
573 the present study a number of less frequently used antibiotic agents, e.g. ceftazidime  
574 (a cephalosporin), showed positive associations with high *Clostridiales* abundances. In  
575 agreement, another cephalosporin (cefepime) has previously been attributed  
576 clostridial sparing effects [46]. However, ceftazidime was associated with reduced  
577 bacterial alpha diversity to a similar degree as vancomycin and ciprofloxacin in a  
578 previous study [42]. Elucidating the effects of antibiotic agents potentially  
579 contributing to maintaining gut microbial homeostasis in HSCT therefore require  
580 further investigation. Of note, we did not take the mode of application of the  
581 antibiotics into account here, which might limit the strength of our conclusion. It  
582 remains to be determined whether certain antibiotics modulate the patients'  
583 microbiome and how this might lead to either positive or adverse clinical outcomes.

584

## 585 **Conclusions**

586 Our findings support the increasing evidence of microbial involvement in the context  
587 of HSCT in cancer patients. We provide evidence for the association between specific  
588 microbial taxa and host immune markers. In particular, we examined the prognostic  
589 potential of immune markers and gut microbial community dynamics for immune  
590 reconstitution and outcomes after HSCT by revealing multivariate associations. We  
591 observed increased human beta-defensin 2 in patients with moderate to severe  
592 aGvHD and high mortality. In those patients, NK and B cell reconstitution was slow  
593 compared to patients with low mortality. These associations only applied when  
594 distinct gut microbial abundance patterns were observed, namely low abundances of  
595 *Ruminococcaceae* and high abundances of *Lactobacillaceae*. Therefore, hBD2, in  
596 connection with longitudinal microbial community pattern surveillance, could be  
597 further evaluated as a potential novel candidate marker to identify patients at risk of  
598 adverse outcomes (e.g. aGvHD) and slow immune cell reconstitution after HSCT,  
599 contributing to improved clinical outcomes. Of note, our cohort comprised a relatively  
600 small number of patients with different primary diseases and conditioning regimens,  
601 and our findings would therefore benefit from being assessed in larger, more  
602 homogenous patient groups. Importantly, microbial abundances also depended on

603 antibiotic treatment. Our findings suggest that certain antimicrobial agents might  
604 contribute to a shift from obligate to facultative anaerobes. This highlights the need  
605 to assess the usage of specific antibiotics in more detail and to take antibiotic  
606 treatment into consideration when describing microbial communities in HSCT  
607 recipients.

608

## 609 **Methods**

### 610 **Patient recruitment and sample collection**

611 We recruited 37 children (age range 1.1 - 18.0 years) undergoing their first  
612 myeloablative allogeneic hematopoietic stem cell transplantation at Copenhagen  
613 University Hospital Rigshospitalet, Denmark, from June 2010 to September 2012.  
614 Patients' clinical characteristics are listed in Additional file 1: Table S1. Further  
615 information can also be found in previous studies where the cohort has been  
616 examined in relation to other questions [17, 47–49]. All patients received  
617 pretreatment with a myeloablative conditioning regimen, starting on day -7  
618 (Additional file 1: Table S1). Four patients were re-transplanted at day +157, +518,  
619 +712 and +1360 after the first transplantation, respectively.

620 Sampling time points were defined according to the following intervals: pre-HSCT  
621 (collected between day -33 and day -3), at the time of HSCT, preferably before graft  
622 infusion (collected between day -2 day +2) and weekly during the first six weeks after  
623 transplantation (week +1: day +3 to day +10, week +2: day +11 to day +17, week +3:  
624 day +18 to day +24, week +4: day +25 to day +31, week +5: day +32 to day +38, week  
625 +6: day +39 to day +45) (Figure 1A). Broader intervals applied to follow-up time points:  
626 Month +1 (between days +21 and +44), month +2 (between days +45 and +70), month  
627 +3 (between days +77 and +105), month +6 (between days +161 and +197) and 1 year  
628 post transplantation (between days +346 and +375).

629

### 630 **Infections and antibiotics**

631 Bacterial infections from before transplantation until 1 year post-HSCT were taken  
632 into consideration for downstream analysis. For each time point, it was recorded  
633 whether any bacterial infection occurred within the respective specified interval or  
634 not (1/0). Antibiotic treatment from before HSCT (from day -90) until month +2 was  
635 taken into consideration. We included only those time points corresponding to the  
636 time points of microbiota profiling into downstream analyses.

637

### 638 **Analysis of T, B and NK cells in peripheral blood**

639 T, B and NK cell counts were determined in months +1, +2, +3, and +6 post  
640 transplantation. Lymphocyte subsets in peripheral blood were quantified using  
641 Trucount Tubes (Becton Dickinson, Albertslund, Denmark) together with the following  
642 panel of conjugated monoclonal antibodies and analysed on a FC500 flow cytometer

643 (Beckman Coulter, Copenhagen, Denmark): CD3-PerCP, CD3- FITC, CD4-FITC, CD8-PE,  
644 CD45-PerCP, CD16/56-PE, CD20-FITC and CD19-PE (Becton Dickinson). CD3+ T cells,  
645 CD3+CD4+ T cells and CD3+CD8+ T cells were determined. NK cells were differentiated  
646 by CD3-CD45+CD16+CD56+ phenotype. The following B cell phenotypes were  
647 distinguished: total B cells (CD45+CD19+), mature B cells (CD45+CD19+CD20+) and  
648 immature B cells (CD45+CD19+CD20-). Data of these immune cell populations have  
649 been published previously in a different context [47].

650

#### 651 **Analysis of monocytes and neutrophils**

652 Leukocyte numbers and subsets were monitored daily during hospitalization and  
653 subsequently every week in the outpatient clinic using flow cytometry (Sysmex XN) or,  
654 in case of very low leucocytes, counted by microscopy (CellaVision DM96 microscope).  
655 Mean monocyte and neutrophil counts were calculated for further analysis per time  
656 point according to the intervals specified above.

657

#### 658 **Quantification of inflammatory markers**

659 EDTA-anticoagulated and heparinized blood was sampled and then centrifuged within  
660 2 hours after collection. The plasma was isolated and cryopreserved in 0.5-ml aliquots  
661 at -80°C. IL-6 levels on day +7 were determined in EDTA-anticoagulated plasma using  
662 the Human Th1/Th2/Th17 Cytometric Bead Array kit (Becton, Dickinson and Co.,  
663 Denmark) and a FACSCalibur flowcytometer (Becton, Dickinson and Co), according to  
664 the manufacturer's instructions with a detection limit of 2.5 pg/mL. IL-6 data have  
665 been published previously in another context for a larger cohort than the patients  
666 included here [17, 48]. CRP levels were measured daily by Modular P Modular (normal  
667 range, 0 to 10 mg/L) at the Department of Clinical Biochemistry, Copenhagen  
668 University Hospital Rigshospitalet, Denmark. Mean CRP levels were calculated for  
669 further analysis per time point according to the intervals specified above. Mean CRP  
670 levels pre-HSCT include measurements from day -7 to day -3, i.e. the days after the  
671 start of conditioning (except for day -7).

672

#### 673 **Quantification of Citrulline**

674 Plasma citrulline concentrations pre-HSCT (before the start of conditioning (day -7))  
675 and at days +7 and +21 were measured by reverse-phase high-performance liquid  
676 chromatography of their phenylisothiocyanate derivatives from heparinized plasma,  
677 as described previously [17, 48]. Citrulline levels have previously been described for  
678 patients of this cohort in a different context [17, 48].

679

#### 680 **Enzyme-linked immunosorbent assay (ELISA) of human beta defensins**

681 Human beta defensin 2 and 3 (hBD2 and hBD3) concentrations in heparinized plasma  
682 samples of 37 patients at eight time points (pre-HSCT (before start of conditioning,  
683 except for 4 patients sampled at day -6 or -5), on the day of transplantation, weeks +1



684 to +4, month +2 and +3) and 10 healthy controls (sampled once each) were quantified  
685 by two-step sandwich ELISA following the manufacturer's instructions (Peprotech  
686 Human BD-2 and BD-3, Standard ABTS ELISA Development Kit, cat.no. 900-K172 and  
687 900-K210, respectively). Samples of 3 out of 10 healthy individuals were additionally  
688 spiked to a peptide concentration of 1000 pg/ml. Two replicates were measured per  
689 sample and their mean was used for further analysis. Samples were measured  
690 undiluted as well as in 1:4 and 1:16 dilutions to also cover concentrations potentially  
691 exceeding the upper detection limit. Samples with very high concentrations were  
692 additionally measured in 1:32 and 1:128 dilutions. Detection limits were 16 – 2000  
693 pg/ml for hBD2 and 31– 4000 pg/ml for hBD3. Absorbance was measured on a  
694 VICTOR™ X3 Multilabel Plate Reader (Perkin Elmer, Inc., USA) at 405 nm. Wavelength  
695 correction at 540 nm was used to prevent optical interference caused by the material  
696 of the microtiter plate. Concentrations of hBD3 were mostly below the limit of  
697 detection, except for a few exceptionally high measurements (average: 1450.69  
698 pg/ml, median: 0 pg/ml, range: 0 – 279038.71 pg/ml).

699

#### 700 **DNA isolation from fecal samples and 16S rRNA gene sequencing**

701 Fecal samples for analysis of the intestinal microbiome were collected from a subset  
702 of 30 patients at 7 time points: pre-HSCT (5 patients were sampled after the start of  
703 conditioning (between day -6 and day -4)), at the time of HSCT and once weekly during  
704 the first five weeks after transplantation. The intestinal microbiome was characterized  
705 at 1-2 time points in 8 patients (27%), at 3-4 time points in 15 patients (50%) and at 5-  
706 6 time points in 8 patients (27%) (Additional file 1: Table S1). In patients who  
707 underwent re-transplantation, no feces samples collected after the second  
708 transplantation were included in this study. In total, 97 fecal samples were obtained.

709

710 DNA from fecal samples and a blank control were isolated with the use of the Maxwell  
711 16 Instrument (Promega Corporation) following the manufacturer's instructions for  
712 the low elution volume blood DNA system. Alterations to the protocol included  
713 additional lysozyme treatment and bead beating with stainless steel beads for 2  
714 min/20 Hz in a tissue lyser (Qiagen). In each sample including the blank control, the  
715 V4-V5 region of the 16S ribosomal RNA gene were amplified in PCR using the following  
716 barcoded primers: 519F (5#-CAGCAGCCGCGGTAATAC-3#) and 926R (5#-  
717 CCGTCAATTCCTTTGAGTTT-3#). Amplicons were then analyzed for quantity and quality  
718 in an Agilent 2100 Bioanalyzer (Agilent Technologies) with the use of an Agilent RNA  
719 1000 Nano Kit. For library preparation, 50 ng of DNA from each sample was pooled  
720 with multiplex identifiers for 2-region 454 sequencing on GS FLX Titanium  
721 PicoTiterPlates (70675) with the use of a GS FLX Titanium Sequencing Kit XLR70 (Roche  
722 Diagnostics). Library construction and 454 pyrosequencing were performed at the  
723 National High-Throughput DNA Sequencing Centre, University of Copenhagen.

724



## 725 **16S rRNA gene sequence pre-processing**

726 Raw 454 sequence reads stored in standard flowgram format (SFF) were extracted,  
727 converted to and stored in FASTA format with associated quality files (containing  
728 sequence quality scores) using the *sffinfo* command of the bioinformatics software  
729 tool *mothur* [50]. Trimming according to the *clipQualLeft* and *clipQualRight* values  
730 provided by the sequence provider was disabled because cut-off values are opaque  
731 and not customizable.

732

733 Analysis was continued in the Quantitative Insights Into Microbial Ecology (QIIME;  
734 version 1.9.0) bioinformatics pipeline [51]. FASTA files were demultiplexed and quality  
735 filtered using the script *split\_libraries.py* (Mapping files are available from figshare  
736 (<https://dx.doi.org/10.6084/m9.figshare.6508250>). As the samples were sequenced  
737 bidirectional, each FASTA file was demultiplexed in two steps. Firstly, based on a  
738 mapping file containing the 519F primer as the "LinkerPrimerSequence" and the 926R  
739 primer as the "ReversePrimer", both in 5' to 3' orientation. Secondly, based on a  
740 mapping file containing the 926R primer as the "LinkerPrimerSequence" and the 519F  
741 primer as the "ReversePrimer", again both in 5' to 3' orientation.

742

743 Reads between 200 and 1000 bp length and a minimum quality score of 25 were  
744 retained (default). Sequences with homopolymers longer than 200 bp were removed  
745 from the data set. Removal of reverse primer sequences (*-z truncate\_only* option) was  
746 disabled during demultiplexing. Subsequently, the demultiplexed FASTA files that  
747 were not yet primer-truncated were then used to denoise flowgrams (*.sff.txt* files also  
748 generated by *mothur's sffinfo*) with QIIME's *denoise\_wrapper.py* script. Reverse  
749 primer-truncation had not been done yet to ensure compatibility between FASTA and  
750 *.sff.txt* files. The denoised FASTA output files were then inflated, i.e., flowgram  
751 similarity between cluster centroids was translated to sequence similarity, to be used  
752 for OTU picking. Reverse primers and subsequent sequences in the demultiplexed and  
753 denoised FASTA files were then truncated using the *truncate\_reverse\_primer.py*  
754 script. In the following step, the orientation of the primer-truncated reads that started  
755 with the 926R primer as the "LinkerPrimerSequence" was adjusted by reverse  
756 complementation (with the script *adjust\_seq\_orientation.py*). All trimmed reads were  
757 then concatenated to a single file for further analysis.

758

759 Chimeras were identified using the script *identify\_chimeric\_seqs.py* and method  
760 *usearch61*, which performs both de novo (abundance-based) and reference-based  
761 detection (by comparing the dataset to the chimera-free reference database  
762 Ribosomal Database Project (RDP; training database version 15)). Only those  
763 sequences that were flagged as non-chimeras from both detection methods were  
764 retained (option *-non\_chimeras\_retention = intersection*). Operational taxonomic  
765 unit (OTU) clustering was performed, using the script *pick\_otus.py* (based on the SILVA

766 database, *Silva\_119\_rep\_set97*). OTU tables in BIOM format were created with  
767 *make\_otu\_table.py* (and subsequently converted to JSON BIOM format to be  
768 compatible with analysis in R [52] with the package *phyloseq* [53]). The OTU table and  
769 the taxonomy table are available from figshare  
770 (<https://dx.doi.org/10.6084/m9.figshare.6508187>).

771

## 772 **Statistical analyses**

773 Statistical analyses and creation of graphs were performed with the program R  
774 (Version 3.4.0, R Foundation for Statistical Computing, Vienna, Austria) [52]. All R  
775 scripts documenting our statistical analyses are available from figshare  
776 (<https://dx.doi.org/10.6084/m9.figshare.6508238>). Sequencing data and all related  
777 experimental and clinical data (data sets available from figshare,  
778 <https://dx.doi.org/10.6084/m9.figshare.6508232>) were integrated for analysis with  
779 the R package *phyloseq* and its dependencies [53] (Additional file 11). The resulting  
780 *phyloseq* objects are provided through figshare  
781 (<https://dx.doi.org/10.6084/m9.figshare.6508235>). Plots were generated with the  
782 packages *ggplot2* [54], *plotly* [55], and *mixOmics* [56]. Dose-response analysis of the  
783 ELISA data was performed with four-parameter log-logistic models in the R package  
784 *drc* [57].

785

786 Alpha diversity (measured by inverse Simpson index), levels of human beta-defensin  
787 2 (hBD2) concentration, citrulline and C-reactive protein (CRP), as well as monocyte  
788 counts, NK cell counts, total B cell counts, and CD4+ T cell counts at different time  
789 points were compared using Friedman tests with Benjamini-Hochberg correction for  
790 multiple testing (Additional files 3: Figure S2, Additional files 11 and 12). In addition,  
791 Kendall's coefficient of concordance (Kendall's *W*) was calculated on ranked data for  
792 each marker (Additional file 13). Like the Friedman test, the test for Kendall's *W*  
793 allowed the comparison of marker levels between time points. In addition, the  
794 coefficient of concordance informs about the level of agreement between patients.  
795 Therefore, Kendall's *W* can be interpreted as a measure of effect size for the Friedman  
796 tests. A Kendall's *W* <0.1 was considered as indicating a small effect, 0.1 – 0.5 as a  
797 moderate effect, and > 0.5 as a strong effect. As an exception, hBD2 in healthy controls  
798 was compared with hBD2 in patients at individual time points by using Wilcoxon rank-  
799 sum tests, because hBD2 was only measured once in the healthy control individuals  
800 and can therefore not be analyzed in a Friedman test designed for repeated  
801 measurements. Monocyte counts in Additional file 2: Figure S1B are depicted at more  
802 time points than indicated in Figure 1A because not all time points were included into  
803 further analyses. The day of HSCT, week +1 and week +2 were excluded as data were  
804 missing for ≥40% of the patients. Months +2, +3, and +6, as well as 1 year were chosen  
805 as representative follow-up time points for further analyses as indicated in Figure 1A.

806

807 A core set of OTUs was obtained by retaining 256 OTUs (out of 756 OTUs) with  $\geq 5$   
808 reads in  $\geq 2$  samples using the function *kOverA()* from R package *genefilter* [58].  
809 Subsequently, 17 OTUs that were more abundant in the blank control than in the  
810 majority of samples were removed as potential contaminants prior to downstream  
811 analyses. The resulting count data set of 239 OTUs was transformed for subsequent  
812 analyses using the function *varianceStabilizingTransformation()* in the package  
813 *DESeq2* [59] (Additional file 11). The function implements a Gamma-Poisson mixture  
814 model [60] to account for both library size differences and biological variability.  
815 Median imputations were performed for continuous clinical and immune marker data  
816 with less than 20% missing values. Variables with more than 20% missing values were  
817 excluded from the analysis (Additional files 13 and 14). Central tendencies of immune  
818 cell counts at single time points in relation to clinical outcomes (maximum aGvHD  
819 grade 0-I vs. grade II-IV) were assessed in univariate analyses by Wilcoxon rank-sum  
820 tests and displayed in boxplots (Additional file 14).

821

822 A model selection procedure was implemented to find the relevant variables to be  
823 included in subsequent multivariate analyses of how microbiome patterns are  
824 associated with clinical outcomes, baseline parameters and immune parameters  
825 during the course of transplantation: A Manhattan distance matrix of the variance-  
826 stabilized bacterial community data was calculated using the *distance()* function in  
827 *phyloseq* [53]. Subsequently, permutational multivariate analysis of variance using  
828 distance matrices (*adonis*) for model selection was performed by applying the  
829 *adonis2()* function in the package *vegan* [61] (Additional files 3: Figure S2, Additional  
830 file 15). Permutation design was set up with respect to repeated measurements within  
831 the same patients and the intact chronological order of time points. Besides immune  
832 marker levels and immune cell counts (pre- and post-HSCT, i.e. recipient- and donor-  
833 derived cells, respectively) at the time points described above, we included clinical  
834 outcomes (i.e. overall survival, aGvHD (grade 0-I vs II-IV), and relapse) after  
835 transplantations, antibiotic treatment during the course of transplantation and clinical  
836 patient characteristics in the model to account for possible effects of recipient age at  
837 the time of transplantation, recipient sex, donor type (sibling vs. unrelated), malignant  
838 vs. benign diagnosis, graft type (stem cell source: bone marrow, umbilical cord blood  
839 or peripheral blood) and application of irradiation therapy (yes/no). Variables that  
840 were found to be significant ( $P \leq 0.05$ ) in the *adonis* analysis were included in  
841 subsequent multivariate multi-table analyses, i.e., sparse partial least squares (sPLS)  
842 regression and canonical correspondence analysis (CCpNA) (Additional file 15).  
843 Choosing variables with significant effects in *adonis* for follow-up statistical testing has  
844 been performed previously [62]. Even though validation of the set of selected  
845 variables through a data-splitting approach might be preferable, this was not feasible  
846 due to our relatively small data set. To account for this and to avoid post-selective

847 inference, we renounce calculation of p-values from the two analyses that directly  
848 depend on the pre-selection (sPLS and CCpNA).

849

850 Correlations among the selected clinical variables were assessed in correlation  
851 matrices based on Spearman's rank correlation tests (Additional file 3: Figure S2,  
852 Additional file 14). Matrices were calculated using the *rcorr()* function of the R package  
853 *Hmisc* [63] and displayed with the package *corrplot* [64]. P-values were calculated with  
854 the *rcorr.adjust()* function with correction for multiple testing (method "Holm"). The  
855 Spearman's rank correlation tests were performed on the set of variables selected  
856 from the adonis analysis. However, here we assess correlations among those  
857 variables, and not between variables and microbial abundances.

858

859 Sparse PLS regression was performed by applying the *sppls()* function in the package  
860 *mixOmics* [56] (Additional file 3: Figure S2, Additional file 15). The sPLS regression  
861 allows the integration of the microbial community data matrix and the clinical variable  
862 matrix for multiple regression. It is robust enough to handle collinearity and noise in  
863 the data and is suitable to model multiple response variables [65]. The number of  
864 clinical variables to be kept in the model for each component (*keepY*) was set to 23,  
865 corresponding to the number of variables pre-selected with adonis. We ran the sPLS  
866 regression with a range of numbers (20-40) of OTUs to be kept for each component  
867 (*keepX*). As the results were robust to this choice, *keepX* was set to 30. The number of  
868 components to choose was estimated with the *perf()* function and set to *ncomp* = 2.  
869 The sPLS model was run in regression mode. Thereafter hierarchical clustering was  
870 performed within the *mixOmics cim()* function based on the sPLS regression model  
871 with the clustering method "complete linkage" and the distance method "Pearson's  
872 correlation". Coefficients of pairwise correlations between OTU abundances and  
873 clinical variables were thereby obtained. Furthermore, loading plots were generated  
874 with the function *plotLoadings()* (method = "mean") to visualize loading vectors of  
875 specific OTUs that contribute most to the separation of variables in components 1 and  
876 2.

877

878 Canonical (i.e., bidirectional) correspondence analysis (CCpNA), a multivariate  
879 constrained ordination method, was performed by using the *cca()* function in the  
880 package *vegan* [61] (Additional file 3: Figure S2, Additional file 15). In this method, the  
881 microbial community data matrix is Chi-square transformed and weighted linear  
882 regression on pre-selected constraining variables is performed. The resulting fitted  
883 values are used for correspondence analysis by singular value decomposition. CCpNA  
884 is a constrained method in the sense that it does not aim at depicting all variation in  
885 the data, but only the variation directly explained by the constraints (i.e., the provided  
886 set of pre-selected variables). The resulting triplot is not displayed as a square  
887 representation, but rather corresponds to the percentage of variance explained by

888 axis 1 and 2, respectively, as previously suggested [66]. In contrast to the sPLS analysis,  
889 the CCpnA was performed in canonical mode, i.e., modeling bidirectional relations  
890 between OTU abundances and clinical variables. OTUs with a correlation of  $>0.2$ / $<-0.2$   
891 in the sPLS analysis were included in the CCpnA model.

892

893 As another approach to distinguish between microbial community states of the  
894 intestinal microbiome, we assigned samples to community state types (CSTs) by  
895 partitioning around medoid (PAM) clustering (function *pam()* in package *cluster* [67])  
896 based on a Jensen-Shannon distance of the variance stabilized microbial count data (R  
897 code modified after [68]) (Additional file 3: Figure S2, Additional file 16). The number  
898 of clusters was determined by gap statistic evaluation and silhouette width quality  
899 validation. We further assessed patients' transitions between CSTs over time. OTUs  
900 were assigned to CST - based clusters (Additional file 4: Table S2) based on in which  
901 CST they exhibited the highest average abundance over all samples (within each CST).  
902 Furthermore, we showed detailed longitudinal profiles of the microbial community on  
903 family-level, and selected immune markers for individual patients with aGvHD  
904 (Additional file 17).

905

## 906 **List of abbreviations**

907 3-IS: 3-indoxyl sulfate

908 aGvHD: Acute graft-versus-host disease

909 ALL: Acute lymphoblastic leukemia

910 AML: Acute myeloid leukemia

911 AMP: Antimicrobial peptide CCpnA

912 Canonical correspondence analysis

913 CRP: C-reactive protein

914 CST: Community state typeELISA

915 Enzyme-linked immunosorbent assay

916 GvL effect: Graft-versus-leukemia effect

917 hBD2/hBD3: Human beta-defensin 2/3

918 HLA: Human leukocyte antigen

919 HSCT: Hematopoietic stem cell transplantation

920 IL-6: Interleukin-6

921 NK cell: Natural killer cell

922 OTU: Operational taxonomic unit

923 P: Patient

924 PAM clustering: Partitioning around medoid clustering

925 QIIME: Quantitative Insights Into Microbial Ecology

926 SFF: Standard flowgram format

927 sPLS regression: sparse partial least squares regression

928 TBI: Total body irradiation

929

## 930 **Declarations**

## 931 **Acknowledgements**

932 We thank the patients and their families for participating in the study, and the  
933 National High-Throughput DNA Sequencing Centre at the University of Copenhagen  
934 for library construction and sequencing. Furthermore, we are grateful for helpful  
935 discussions about the statistical analyses with Pratheepa Jeganathan and Kris  
936 Sankaran from the Department of Statistics at Stanford University. We thank Jeffrey  
937 Edward Skiby for reviewing the manuscript.

938

## 939 **Funding**

940 This work was supported by the European Union's Framework program for Research  
941 and Innovation, Horizon2020 (643476), and by the National Food Institute, Technical  
942 University of Denmark.

943

## 944 **Availability of data and material**

945 The 16S rRNA gene sequences are available through the European Nucleotide Archive  
946 (ENA) at the European Bioinformatics Institute (EBI) under accession number  
947 PRJEB25221. The datasets generated and/or analysed during the current study as well  
948 as the R code used to analyze the data are available from the figshare repository at  
949 [https://figshare.com/projects/Specific\\_gut\\_microbiome\\_members\\_are\\_associated\\_](https://figshare.com/projects/Specific_gut_microbiome_members_are_associated_with_distinct_immune_markers_in_allogeneic_hematopoietic_stem_cell_transplantation/35201)  
950 [with\\_distinct\\_immune\\_markers\\_in\\_allogeneic\\_hematopoietic\\_stem\\_cell\\_transplant](https://figshare.com/projects/Specific_gut_microbiome_members_are_associated_with_distinct_immune_markers_in_allogeneic_hematopoietic_stem_cell_transplantation/35201)  
951 [ation/35201](https://figshare.com/projects/Specific_gut_microbiome_members_are_associated_with_distinct_immune_markers_in_allogeneic_hematopoietic_stem_cell_transplantation/35201).

952

## 953 **Author's contributions**

954 A.C.M., K.K., K.G.M., and S.J.P. designed the research; A.C.M., K.K., M.S.C., and S.J.P.  
955 performed the research; A.C.M., S.H., and S.J.P. contributed analytic tools; A.C.M., and  
956 S.J.P. analysed the data; A.C.M. and S.J.P. wrote the manuscript; and K.K., S.H., F.M.A.,  
957 O.L., and K.G.M. edited the manuscript. All authors have read and approved the  
958 manuscript as submitted.

959

## 960 **Ethics approval and consent to participate**

961 Written informed consent was obtained from the patients and/or their legal  
962 guardians. The study protocol was approved by the local ethics committee (H-1-2010-  
963 009) and the Danish Data Protection Agency.

964

## 965 **Consent for publication**

966 Not applicable.

967

## 968 **Competing interests**

969 The authors declare that they have no competing interests.



970

971 **Additional files**

972 Additional file 1: **Table S1. Clinical patient characteristics.** General patient  
973 characteristics, conditioning regimens, complications, and outcomes for the pediatric  
974 cohort ( $n=37$ ) and the subcohort ( $n=30$ ) for which the intestinal microbiome was  
975 characterized. Abbreviations: HLA, human leukocyte antigen; TBI, total body  
976 irradiation; CY, Cyclophosphamide; VP16, Etoposide; BU, Busulfan; MEL, Melphalan;  
977 GvHD, graft-versus-host disease. (PDF)

978

979 Additional file 2: **Figure S1. Temporal patterns of immune markers and immune cells**  
980 **in HSCT patients.** (A) C-reactive protein (CRP) and plasma citrulline levels in HSCT  
981 patients ( $n = 37$ ) over time. CRP levels were significantly higher prior to HSCT and until  
982 week +2 compared to all following time points, e.g. at the day of HSCT (median: 16.93  
983 mg/L, range: 1.22 - 85.28 mg/L) compared to week +3 (median: 3.92 mg/L, range: 1.22  
984 - 55.89 mg/L) ( $P < 0.001$ ). Plasma citrulline levels were significantly lower in week +1  
985 compared to pre-HSCT ( $P < 0.001$ ) and week +3 ( $P < 0.001$ ). (B) Immune cell counts in  
986 HSCT patients over time. Monocyte counts are depicted at more time points than  
987 indicated in Figure 1A, because not all time points were included into further analyses  
988 (see Methods). NK cell counts were higher in months +2 to +6 compared to in month  
989 +1 ( $P < 0.001$ ). B cell counts as well as CD4+ T cell counts increased steadily from  
990 month +1 to month +6 ( $P < 0.001$ ). Y -axes in all plots, except for citrulline, were log10-  
991 transformed for better visualization. Zeros were replaced with 1 to avoid undefined  
992 values on the log-transformed axes. Asterisks indicate whether the component at  
993 each respective time point was significantly different from any of the other time points  
994 (showing the maximum significance level). \*  $P < 0.05$ , \*\*  $P < 0.01$  and \*\*\*  $P < 0.001$ .  
995 (PDF)

996

997 Additional file 3: **Figure S2. Workflow of the statistical analysis approach.** The  
998 diagram displays the major steps of the statistical analyses and their dependencies.  
999 Multivariate analyses (blue box) constitute the main approach, especially the multi-  
1000 table analyses and clustering analyses (green box). To unravel the complexity of the  
1001 multivariate analyses, these were supplemented with univariate analyses (upper grey  
1002 box). (PDF)

1003

1004 Additional file 4: **Table S2. Results of Permutational Multivariate Analysis of Variance**  
1005 **Using Distance Matrices (adonis).** Adonis was employed for model selection to  
1006 identify relevant immune markers and immune cell types to be included in  
1007 downstream analyses (See Methods for details). Significant variables ( $P < 0.05$ ) are  
1008 marked in bold. Abbreviations: hBD2\_sim, plasma human beta-defensin 2 levels at  
1009 time points simultaneous to microbiome characterization; CRP\_sim, C-reactive  
1010 protein levels at time points simultaneous to microbiome characterization;



1011 Lymphocyte\_count\_sim, total lymphocyte counts at time points simultaneous to  
1012 microbiome characterization; pIL6, plasma interleukin 6 concentration; Citr, plasma  
1013 citrulline concentration; CD3+, CD3+ T cell counts; CD4+, CD3+CD4+ T cell counts;  
1014 CD8+, CD3+CD8+ T cell counts; B, total B cell (CD45+CD19+) counts; mat\_B, mature B  
1015 cell (CD45+CD19+CD20+) counts. immat\_B, immature B cell (CD45+CD19+CD20-)  
1016 counts; NK, natural killer cell counts; mean\_mono, mean monocyte counts at  
1017 indicated time point; mean\_neutro, mean neutrophil counts at indicated time point;  
1018 Timepoints: pre, prior to transplantation; w0, on the day of transplantation; w1, w2,  
1019 w3, w4, w5: one, two, three, four and five weeks after transplantation, respectively;  
1020 m1, m2, m3, m4, m6: one, two, three, four and six months after transplantation,  
1021 respectively; 1y, 1 year post transplantation. (PDF)

1022

1023 Additional file 5: **Table S3: Taxonomy and cluster affiliation of OTUs strongly**  
1024 **associated with host-related variables based on sPLS analysis and community state**  
1025 **typing (CST)**. List of the 57 OTUs correlated strongest with variables in the sPLS  
1026 analysis ( $>0.2/<-0.2$ ). SPLS-based clusters were determined by applying the *mixOmics*  
1027 *cim()* function to the sPLS regression model (hierarchical clustering method: complete  
1028 linkage, distance method: Pearson's correlation) (see Methods). Four community  
1029 state types (CSTs) were defined by clustering of fecal samples with similar microbial  
1030 community compositions by partitioning around medoid (PAM) clustering (see  
1031 Methods). OTUs were then assigned to the CST-based clusters in which they exhibited  
1032 the highest average abundance over all samples. The same taxonomic families  
1033 dominated in sPLS- and CST-based clusters, respectively. Cluster 1 was dominated by  
1034 *Lactobacillaceae*. Cluster 2 was characterized mainly by *Ruminococcaceae* and  
1035 *Lachnospiraceae*. Cluster 3 harbored Proteobacteria (P), e. g. *Enterobacteriaceae*. CS-  
1036 typing revealed one additional cluster (4), characterized by a high abundance of  
1037 *Enterococcaceae* and *Staphylococcaceae*. OTU numbers refer to the SILVA database  
1038 (*silva\_119\_rep\_set97*). Phyla abbreviations: F, Firmicutes; B, Bacteroidetes; A,  
1039 Actinobacteria; P, Proteobacteria; FU, Fusobacteria. (PDF)

1040

1041 Additional file 6: **Figure S3. Canonical correspondence analysis (CCpNA) of immune**  
1042 **markers and intestinal bacterial taxa in patients undergoing HSCT**. Triplots showing  
1043 dimension 1 and 2 of the CCpNA that includes continuous clinical variables (arrows),  
1044 categorical variables (+), and OTUs (circles). Samples are depicted as triangles. OTUs  
1045 with a correlation of  $>0.2/<-0.2$  in the sPLS analysis were included in the CCpNA model.  
1046 Only the variables and OTUs with a score  $>0.2/<-0.2$  in at least one CCpNA dimension  
1047 are shown. The OTUs in the CCpNA plots are colored according to the cluster they were  
1048 affiliated with in the sPLS-based hierarchical clustering analysis, and the ellipses  
1049 present an 80% confidence interval, assuming normal distribution. (A) Full size  
1050 visualization corresponding to the CCpNA model shown in Figure 4. Plot dimensions  
1051 correspond to the explained variances of each component. (B) CCpNA including

1052 antibiotic treatment at time points simultaneous to microbiome characterization.  
1053 Antibiotics were added as categorical variables. Depiction of the antibiotic's name (in  
1054 red) indicates administration of the particular antibiotic, and the extension “\_0”  
1055 indicates no administration of the respective antibiotic. Abbreviations of variables are  
1056 the same as in Figure 2. Further abbreviations: graft\_BM: stem cell source bone  
1057 marrow; graft\_UC: stem cell source umbilical cord blood. (PDF)

1058

1059 Additional file 7: **Figure S4. Clustered image map (CIM) of OTU abundances by patient**  
1060 **in the first two sPLS dimensions.** Hierarchical clustering of OTU abundances (bottom)  
1061 and patients' fecal samples (right) (clustering method: complete linkage, distance  
1062 method: Pearson's correlation) was performed within the mixOmics *cim()* function  
1063 based on the sPLS regression model. High abundance of an OTU in a sample is  
1064 represented as positive correlation in the map (red) and low abundance as negative  
1065 correlation (blue). The sampling time points of the fecal samples are displayed in the  
1066 side bar on the left (blue gradient from pre-HSCT time point (light blue) to week +5  
1067 post HSCT (dark blue)). The top side bar shows taxonomic information on family level.  
1068 Sample names on the right indicate patient (P) and time point (pre: pre-HSCT, d0: day  
1069 of HSCT, w: week). An “a” or “b” indicates that two samples were collected from the  
1070 respective patient at the same time point, but on two different days. (PDF)

1071

1072 Additional file 8: **Figure S5. Community state types and gut microbial patterns.** Heat  
1073 map of variance stabilized counts of the 50 most abundant OTUs of the intestinal  
1074 microbiome over all samples, grouped into community state types (CSTs). Based on  
1075 their OTU-composition, samples were assigned to community state types (CSTs) by  
1076 partitioning around medoid (PAM) clustering using Bray-Curtis distance. The optimal  
1077 number of clusters ( $k = 4$ ) was estimated from the gap statistic and Silhouette width  
1078 validation. Members of the *Lactobacillaceae* family dominated the abundance  
1079 profiles within CST 1. CST 2 exhibited domination by *Lachnospiraceae*,  
1080 *Erysipelotrichaceae* and *Ruminococcaceae* members. *Enterobacteriaceae*,  
1081 *Streptococcaceae* and *Staphylococcaceae* were characteristic for CST 3. CST 4 was  
1082 characterized by a high abundance of *Enterococcaceae*. Average Silhouette width was  
1083  $s(i) = 0.16$  (range: -0.02 – 0.36), with CST 1 and CST 4 being the best defined clusters  
1084 ( $s(i) = 0.23$  and 0.36, respectively). A Silhouette coefficient  $s(i)$  close to 1 indicates  
1085 appropriate clustering of the respective samples. Sample names at the bottom  
1086 indicate patient (P) and time point (pre: pre-HSCT, d0: day of HSCT, w: week). An “a”  
1087 or “b” indicates that two samples were collected from the respective patient at the  
1088 same time point, but on two different days. (PDF)

1089

1090 Additional file 9: **Figure S6. Longitudinal profiles of microbial community**  
1091 **composition and immune markers in patients with aGvHD who survived.** In three  
1092 representative patients with moderate to severe aGvHD who survived, high

1093 abundance of *Lactobacillaceae* was observed already before aGvHD onset. None of  
1094 the depicted patients had a bacterial infection recorded during the monitored period.  
1095 InvSimpson, inverse Simpson diversity index; hBD2, human beta-defensin 2. (PDF)  
1096 Additional file 10: **Supplementary Discussion**. Discussion concerning survival  
1097 following high *Lactobacillaceae* abundances prior to the onset of aGvHD, and  
1098 associations of adverse outcomes with *Enterococcus* compared with previous studies.  
1099 (PDF)

1100

1101 Additional file 11: **R data analysis report 1**. Data preparation, filtering and  
1102 transformation. (HTML)

1103

1104 Additional file 12: **R data analysis report 2**. Bacterial alpha-diversity over time and  
1105 rank abundance curve for the gut microbiome of HSCT patients. (HTML)

1106

1107 Additional file 13: **R data analysis report 3**. Temporal patterns of immune markers and  
1108 immune cells in HSCT patients. (HTML)

1109

1110 Additional file 14: **R data analysis report 4**. Correlations between immune markers,  
1111 immune cell counts, and outcomes in HSCT patients. (HTML)

1112

1113 Additional file 15: **R data analysis report 5**. Variable selection and multivariate  
1114 analyses of immune parameters and intestinal bacterial taxa in HSCT patients. (HTML)

1115

1116 Additional file 16: **R data analysis report 6**. Clustering of samples into Community  
1117 State Types (CSTs) based on Jenson-Shannon divergence. (HTML)

1118

1119 Additional file 17: **R data analysis report 7**. Longitudinal profiles of microbial  
1120 community composition and immune markers. (HTML)

1121

1122

## 1123 **References**

1124 1. Maukonen J, Kolho K-L, Paasela M, Honkanen J, Klemetti P, Vaarala O, et al.  
1125 Altered Fecal Microbiota in Paediatric Inflammatory Bowel Disease. *J Crohn's Colitis*.  
1126 2015;9:1088–95. doi:10.1093/ecco-jcc/jjv147.

1127 2. Lynch S V., Pedersen O. The Human Intestinal Microbiome in Health and Disease.  
1128 *N Engl J Med*. 2016;375:2369–79. doi:10.1056/NEJMra1600266.

1129 3. Lemon KP, Armitage GC, Relman DA, Fischbach MA. Microbiota-Targeted  
1130 Therapies: An Ecological Perspective. *Sci Transl Med*. 2012;4:137rv5-137rv5.  
1131 doi:10.1126/scitranslmed.3004183.

- 1132 4. Taur Y, Jenq RR, Perales M, Littmann ER, Morjaria S, Ling L, et al. The effects of  
1133 intestinal tract bacterial diversity on mortality following allogeneic hematopoietic  
1134 stem cell transplantation. *Transplantation*. 2014;124:1174–82. doi:10.1182/blood-  
1135 2014-02-554725.The.
- 1136 5. Liu C, Frank DN, Horch M, Chau S, Ir D, Horch EA, et al. Associations between acute  
1137 gastrointestinal GvHD and the baseline gut microbiota of allogeneic hematopoietic  
1138 stem cell transplant recipients and donors. *Bone Marrow Transplant Adv online Publ*.  
1139 2017;doi August:1–8. doi:10.1038/bmt.2017.200.
- 1140 6. Appelbaum FR. Haematopoietic cell transplantation as immunotherapy. *Nature*.  
1141 2001;411:385–9. doi:10.1038/35077251.
- 1142 7. Barrett AJ. Understanding and harnessing the graft-versus-leukaemia effect. *Br J*  
1143 *Haematol*. 2008;142:877–88. doi:10.1111/j.1365-2141.2008.07260.x.
- 1144 8. Gyurkocza B, Sandmaier BM. Conditioning regimens for hematopoietic cell  
1145 transplantation: one size does not fit all. *Blood*. 2014;124:344–53.  
1146 doi:10.1182/blood-2014-02-514778.
- 1147 9. Holtick U, Albrecht M, Chemnitz JM, Theurich S, Skoetz N, Scheid C, et al. Bone  
1148 marrow versus peripheral blood allogeneic haematopoietic stem cell transplantation  
1149 for haematological malignancies in adults. *Cochrane Database Syst Rev*. 2014.  
1150 doi:10.1002/14651858.CD010189.pub2.
- 1151 10. Tiercy J-M. How to select the best available related or unrelated donor of  
1152 hematopoietic stem cells? *Haematologica*. 2016;101:680–7.  
1153 doi:10.3324/haematol.2015.141119.
- 1154 11. Holler E, Butzhammer P, Schmid K, Hundsrucker C, Koestler J, Peter K, et al.  
1155 Metagenomic Analysis of the Stool Microbiome in Patients Receiving Allogeneic  
1156 Stem Cell Transplantation: Loss of Diversity Is Associated with Use of Systemic  
1157 Antibiotics and More Pronounced in Gastrointestinal Graft-versus-Host Disease. *Biol*  
1158 *Blood Marrow Transplant*. 2014;20:640–5. doi:10.1016/j.bbmt.2014.01.030.
- 1159 12. Shono Y, Docampo MD, Peled JU, Perobelli SM, Jenq RR. Intestinal microbiota-  
1160 related effects on graft-versus-host disease. *Int J Hematol*. 2015;101:428–37.  
1161 doi:10.1007/s12185-015-1781-5.
- 1162 13. Jenq RR, Taur Y, Devlin SM, Ponce DM, Goldberg JD, Ahr KF, et al. Intestinal  
1163 Blautia Is Associated with Reduced Death from Graft-versus-Host Disease. *Biol Blood*  
1164 *Marrow Transplant*. 2015;21:1373–83. doi:10.1016/j.bbmt.2015.04.016.
- 1165 14. Jenq RR, Ubeda C, Taur Y, Menezes CC, Khanin R, Dudakov JA, et al. Regulation of

- 1166 intestinal inflammation by microbiota following allogeneic bone marrow  
1167 transplantation. *J Exp Med*. 2012;209:903–11. doi:10.1084/jem.20112408.
- 1168 15. Taur Y, Xavier JB, Lipuma L, Ubeda C, Goldberg J, Gobourne a., et al. Intestinal  
1169 Domination and the Risk of Bacteremia in Patients Undergoing Allogeneic  
1170 Hematopoietic Stem Cell Transplantation. *Clin Infect Dis*. 2012;55:905–14.  
1171 doi:10.1093/cid/cis580.
- 1172 16. Gosselin KB, Feldman HA, Sonis AL, Bechard LJ, Kellogg MD, Gura K, et al. Serum  
1173 citrulline as a biomarker of gastrointestinal function during hematopoietic cell  
1174 transplantation in children. *J Pediatr Gastroenterol Nutr*. 2014;58:709–14.  
1175 doi:10.1097/MPG.0000000000000335.
- 1176 17. Pontoppidan PL, Jordan K, Carlsen AL, Uhlving HH, Kielsen K, Christensen M, et al.  
1177 Associations between gastrointestinal toxicity, micro RNA and cytokine production in  
1178 patients undergoing myeloablative allogeneic stem cell transplantation. *Int*  
1179 *Immunopharmacol*. 2015;25:180–8. doi:10.1016/j.intimp.2014.12.038.
- 1180 18. Sporrer D, Gessner A, Hehlhans T, Oefner PJ, Holler E. The Microbiome and  
1181 Allogeneic Stem Cell Transplantation. *Curr Stem Cell Reports*. 2015;1:53–9.  
1182 doi:10.1007/s40778-014-0006-9.
- 1183 19. Liu S, He LR, Wang W, Wang GH, He ZY. Prognostic value of plasma human beta-  
1184 defensin 2 level on short-term clinical outcomes in patients with community-  
1185 acquired pneumonia: a preliminary study. *Respir Care*. 2013;58:655–61.  
1186 doi:58/4/655 [pii];10.4187/respcare.01827 [doi].
- 1187 20. Meisch JP, Nishimura M, Vogel RM, Sung HC, Bednarchik BA, Ghosh SK, et al.  
1188 Human  $\beta$ -Defensin 3 Peptide is Increased and Redistributed in Crohn's Ileitis.  
1189 *Inflamm Bowel Dis*. 2013;19:942–53. doi:10.1097/MIB.0b013e318280b11a.
- 1190 21. de Koning C, Plantinga M, Besseling P, Boelens JJ, Nierkens S. Immune  
1191 Reconstitution after Allogeneic Hematopoietic Cell Transplantation in Children. *Biol*  
1192 *Blood Marrow Transplant*. doi:10.1016/j.bbmt.2015.08.028.
- 1193 22. Furusawa Y, Obata Y, Hase K. Commensal microbiota regulates T cell fate  
1194 decision in the gut. *Semin Immunopathol*. 2015;37:17–25. doi:10.1007/s00281-014-  
1195 0455-3.
- 1196 23. Donaldson GP, Lee SM, Mazmanian SK. Gut biogeography of the bacterial  
1197 microbiota. *Nat Rev Microbiol*. 2015;14:20–32. doi:10.1038/nrmicro3552.
- 1198 24. Taur Y, Pamer EG. Microbiome mediation of infections in the cancer setting.  
1199 *Genome Med*. 2016;8:40. doi:10.1186/s13073-016-0306-z.

- 1200 25. Schlee M, Harder J, Köten B, Stange EF, Wehkamp J, Fellermann K. Probiotic  
1201 lactobacilli and VSL#3 induce enterocyte  $\beta$ -defensin 2. *Clin Exp Immunol.*  
1202 2008;151:528–35. doi:10.1111/j.1365-2249.2007.03587.x.
- 1203 26. Paolillo R, Romano Carratelli C, Sorrentino S, Mazzola N, Rizzo A.  
1204 Immunomodulatory effects of *Lactobacillus plantarum* on human colon cancer cells.  
1205 *Int Immunopharmacol.* 2009;9:1265–71. doi:10.1016/j.intimp.2009.07.008.
- 1206 27. Chung H, Pamp SJ, Hill JA, Surana NK, Edelman SM, Troy EB, et al. Gut immune  
1207 maturation depends on colonization with a host-specific microbiota. *Cell.*  
1208 2012;149:1578–93. doi:10.1016/j.cell.2012.04.037.
- 1209 28. Bäumlér AJ, Sperandio V. Interactions between the microbiota and pathogenic  
1210 bacteria in the gut. *Nature.* 2016;535:85–93. doi:10.1038/nature18849.
- 1211 29. Fujimaki K, Maruta A, Yoshida M, Kodama F, Matsuzaki M, Fujisawa S, et al.  
1212 Immune reconstitution assessed during five years after allogeneic bone marrow  
1213 transplantation. *Bone Marrow Transplant* 2001 2712. 2001;27:1275.  
1214 doi:10.1038/sj.bmt.1703056.
- 1215 30. Bartelink IH, Belitser S V., Knibbe CAJ, Danhof M, de Pagter AJ, Egberts TCG, et al.  
1216 Immune Reconstitution Kinetics as an Early Predictor for Mortality using Various  
1217 Hematopoietic Stem Cell Sources in Children. *Biol Blood Marrow Transplant.*  
1218 2013;19:305–13. doi:10.1016/j.bbmt.2012.10.010.
- 1219 31. Corre E, Carmagnat M, Busson M, de Latour RP, Robin M, Ribaud P, et al. Long-  
1220 term immune deficiency after allogeneic stem cell transplantation: B-cell deficiency  
1221 is associated with late infections. *Haematologica.* 2010;95:1025–9.  
1222 doi:10.3324/haematol.2009.018853.
- 1223 32. Montassier E, Gastinne T, Vangay P, Al-Ghalith GA, Bruley Des Varannes S,  
1224 Massart S, et al. Chemotherapy-driven dysbiosis in the intestinal microbiome.  
1225 *Aliment Pharmacol Ther.* 2015;42:515–28.
- 1226 33. Jenq RR, Ubeda C, Taur Y, Menezes CC, Khanin R, Dudakov JA, et al. Regulation of  
1227 intestinal inflammation by microbiota following allogeneic bone marrow  
1228 transplantation. *J Exp Med.* 2012;209:903–11. doi:10.1084/jem.20112408.
- 1229 34. Gopalakrishnan V, Spencer CN, Nezi L, Reuben A, Andrews MC, Karpinets T V, et  
1230 al. Gut microbiome modulates response to anti-PD-1 immunotherapy in melanoma  
1231 patients. *Science.* 2018;359:97–103. doi:10.1126/science.aan4236.
- 1232 35. Weber D, Oefner PJ, Hiergeist A, Koestler J, Gessner A, Weber M, et al. Low  
1233 urinary indoxyl sulfate levels early after transplantation reflect a disrupted



- 1234 microbiome and are associated with poor outcome. *Blood*. 2015;126:1723–8.  
1235 doi:10.1182/blood-2015-04-638858.
- 1236 36. Mathewson ND, Jenq R, Mathew A V, Koenigsnecht M, Hanash A, Toubai T, et  
1237 al. Gut microbiome-derived metabolites modulate intestinal epithelial cell damage  
1238 and mitigate graft-versus-host disease. *Nat Immunol*. 2016;17:505–13.  
1239 doi:10.1038/ni.3400.
- 1240 37. Salzman NH, Hung K, Haribhai D, Chu H, Karlsson-Sjöberg J, Amir E, et al. Enteric  
1241 defensins are essential regulators of intestinal microbial ecology. *Nat Immunol*.  
1242 2010;11:76–82. doi:10.1038/ni.1825.
- 1243 38. Rivera-Chávez F, Lopez CA, Bäumlér AJ. Oxygen as a driver of gut dysbiosis. *Free*  
1244 *Radic Biol Med*. 2017;105:93–101. doi:10.1016/J.FREERADBIOMED.2016.09.022.
- 1245 39. Fouhy F, Guinane CM, Hussey S, Wall R, Ryan CA, Dempsey EM, et al. High-  
1246 throughput sequencing reveals the incomplete, short-term recovery of infant gut  
1247 microbiota following parenteral antibiotic treatment with ampicillin and gentamicin.  
1248 *Antimicrob Agents Chemother*. 2012;56:5811–20. doi:10.1128/AAC.00789-12.
- 1249 40. Weber D, Jenq RR, Peled JU, Taur Y, Hiergeist A, Koestler J, et al. Microbiota  
1250 Disruption Induced by Early Use of Broad Spectrum Antibiotics is an Independent  
1251 Risk Factor of Outcome after Allogeneic Stem Cell Transplantation. Elsevier Inc.;  
1252 2017. doi:10.1016/j.bbmt.2017.02.006.
- 1253 41. Simms-Waldrip TR, Sunkersett G, Coughlin LA, Savani MR, Arana C, Kim J, et al.  
1254 Antibiotic-Induced Depletion of Anti-inflammatory Clostridia Is Associated with the  
1255 Development of Graft-versus-Host Disease in Pediatric Stem Cell Transplantation  
1256 Patients. *Biol Blood Marrow Transplant*. 2017;23:820–9.  
1257 doi:10.1016/J.BBMT.2017.02.004.
- 1258 42. Weber D, Hiergeist A, Weber M, Dettmer K, Wolff D, Hahn J, et al. Detrimental  
1259 effect of broad-spectrum antibiotics on intestinal microbiome diversity in patients  
1260 after allogeneic stem cell transplantation: Lack of commensal sparing antibiotics. *Clin*  
1261 *Infect Dis*. 2018. doi:10.1093/cid/ciy711.
- 1262 43. Isaac S, Scher JU, Djukovic A, Jiménez N, Littman DR, Abramson SB, et al. Short-  
1263 and long-term effects of oral vancomycin on the human intestinal microbiota. *J*  
1264 *Antimicrob Chemother*. 2017;72:128–36. doi:10.1093/jac/dkw383.
- 1265 44. Yeh T-C, Liu H-C, Hou J-Y, Chen K-H, Huang T-H, Chang C-Y, et al. Severe  
1266 infections in children with acute leukemia undergoing intensive chemotherapy can  
1267 successfully be prevented by ciprofloxacin, voriconazole, or micafungin prophylaxis.  
1268 *Cancer*. 2014;120:1255–62. doi:10.1002/cncr.28524.



- 1269 45. Dethlefsen L, Relman DA. Incomplete recovery and individualized responses of  
1270 the human distal gut microbiota to repeated antibiotic perturbation. *Proc Natl Acad*  
1271 *Sci U S A*. 2011;108 Suppl Supplement 1:4554–61. doi:10.1073/pnas.1000087107.
- 1272 46. Shono Y, Docampo MD, Peled JU, Perobelli SM, Velardi E, Tsai JJ, et al. Increased  
1273 GVHD-related mortality with broad-spectrum antibiotic use after allogeneic  
1274 hematopoietic stem cell transplantation in human patients and mice. *Sci Transl Med*.  
1275 2016;8:339ra71-339ra71. doi:10.1126/scitranslmed.aaf2311.
- 1276 47. Kielsen K, Jordan KK, Uhlving HH, Pontoppidan PL, Shamim Z, Ifversen M, et al. T  
1277 cell Reconstitution in Allogeneic Haematopoietic Stem Cell Transplantation:  
1278 Prognostic Significance of Plasma Interleukin-7. *Scand J Immunol*. 2015;81:72–80.  
1279 doi:10.1111/sji.12244.
- 1280 48. Jordan K, Pontoppidan P, Uhlving HH, Kielsen K, Burrin DG, Weischendorff S, et  
1281 al. Gastrointestinal Toxicity, Systemic Inflammation, and Liver Biochemistry in  
1282 Allogeneic Hematopoietic Stem Cell Transplantation. *Biol Blood Marrow Transplant*.  
1283 2017;23:1170–6. doi:10.1016/j.bbmt.2017.03.021.
- 1284 49. Kielsen K, Ryder LP, Lennox-Hvenekilde D, Gad M, Nielsen CH, Heilmann C, et al.  
1285 Reconstitution of Th17, Tc17 and Treg cells after paediatric haematopoietic stem cell  
1286 transplantation: Impact of interleukin-7. *Immunobiology*. 2018;223:220–6.  
1287 doi:10.1016/j.imbio.2017.10.023.
- 1288 50. Schloss PD, Westcott SL, Ryabin T, Hall JR, Hartmann M, Hollister EB, et al.  
1289 Introducing mothur: open-source, platform-independent, community-supported  
1290 software for describing and comparing microbial communities. *Appl Environ*  
1291 *Microbiol*. 2009;75:7537–41. doi:10.1128/AEM.01541-09.
- 1292 51. Caporaso JG, Kuczynski J, Stombaugh J, Bittinger K, Bushman FD, Costello EK, et  
1293 al. QIIME allows analysis of high-throughput community sequencing data. *Nat*  
1294 *Methods*. 2010;7:335–6. doi:10.1038/nmeth.f.303.
- 1295 52. R Core Team. R: A language and environment for statistical computing. R  
1296 Foundation for Statistical Computing, Vienna, Austria. 2017. [https://www.r-](https://www.r-project.org/)  
1297 [project.org/](https://www.r-project.org/).
- 1298 53. McMurdie PJ, Holmes S. phyloseq: An R Package for Reproducible Interactive  
1299 Analysis and Graphics of Microbiome Census Data. *PLoS One*. 2013;8:e61217.  
1300 doi:10.1371/journal.pone.0061217.
- 1301 54. Wickham H. *ggplot2: Elegant Graphics for Data Analysis*. Springer Verlag New  
1302 York; 2016.

- 1303 55. Sievert C, Parmer C, Hocking T, Chamberlain S, Ram K, Corvellec, Marianne  
1304 Despouy P. plotly: Create Interactive Web Graphics via “plotly. js.” 2016.  
1305 <https://plot.ly/r>, [https://cpsievert.github.io/plotly\\_book/](https://cpsievert.github.io/plotly_book/),  
1306 <https://github.com/ropensci/plotly#readme>.
- 1307 56. Cao K Le, Rohart F, Gonzalez I, Dejean S, Gautier B, Bartolo F, et al. mixOmics:  
1308 Omics Data Integration Project. R package version 6.1.3. 2017. [https://cran.r-](https://cran.r-project.org/package=mixOmics)  
1309 [project.org/package=mixOmics](https://cran.r-project.org/package=mixOmics).
- 1310 57. Ritz C, Baty F, Streibig JC, Gerhard D. Dose-Response Analysis Using R. PLoS One.  
1311 2015;10:e0146021. doi:10.1371/journal.pone.0146021.
- 1312 58. Gentleman R, Carey V, Huber W, Hahne F. genefilter: methods for filtering genes  
1313 from microarray experiments. R package version 1.58.1. 2017.
- 1314 59. Love MI, Huber W, Anders S. Moderated estimation of fold change and  
1315 dispersion for RNA-seq data with DESeq2. Genome Biol. 2014;15:550.  
1316 doi:10.1186/s13059-014-0550-8.
- 1317 60. McMurdie PJ, Holmes S. Waste Not, Want Not: Why Rarefying Microbiome Data  
1318 Is Inadmissible. PLoS Comput Biol. 2014;10:e1003531.  
1319 doi:10.1371/journal.pcbi.1003531.
- 1320 61. Oksanen J, Blanchet FG, Friendly M, Kindt R, Legendre P, McGlinn D, et al. Vegan:  
1321 Community Ecology Package. R Package Version. 2.4-3. [https://cran.R-](https://cran.R-project.org/package=vegan)  
1322 [project.org/package=vegan](https://cran.R-project.org/package=vegan). 2017. doi:10.1029/2006JF000545.
- 1323 62. Pérez-Losada M, Freishtat RJ, Kwak C, Authalet KJ, Hoptay CE, Crandall KA.  
1324 Pediatric asthma comprises different phenotypic clusters with unique nasal  
1325 microbiotas. Microbiome. 2018;6:1–13.
- 1326 63. Harrell Jr FE, Dupont C. Hmisc: Harrell Miscellaneous. R package version 4.0-3.  
1327 2017.
- 1328 64. Wei T, Simko V. corrplot: Visualization of a Correlation Matrix. R package version  
1329 0.77. 2017. <https://github.com/taiyun/corrplot>.
- 1330 65. Lee D, Lee W, Lee Y, Pawitan Y. Sparse partial least-squares regression and its  
1331 applications to high-throughput data analysis. Chemom Intell Lab Syst. 2011;109:1–  
1332 8. doi:10.1016/J.CHEMOLAB.2011.07.002.
- 1333 66. Callahan BJ, Sankaran K, Fukuyama JA, McMurdie PJ, Holmes SP. Bioconductor  
1334 workflow for microbiome data analysis: from raw reads to community analyses.  
1335 F1000Research. 2016;5:1492. doi:10.12688/f1000research.8986.1.

1336 67. Maechler M, Rousseeuw P, Struyf A, Hubert M, Hornik K. cluster: Cluster Analysis  
1337 Basics and Extensions. R package version 2.0.6. 2017.

1338 68. DiGiulio DB, Callahan BJ, McMurdie PJ, Costello EK, Lyell DJ, Robaczewska A, et  
1339 al. Temporal and spatial variation of the human microbiota during pregnancy. Proc  
1340 Natl Acad Sci. 2015;112:11060–5. doi:10.1073/pnas.1502875112.

1341

1342

## 1343 **Figure legends**

1344

1345 **Figure 1. Monitoring of the host immune system and intestinal microbiome in**  
1346 **hematopoietic stem cell transplantation (HSCT).** (A) Study outline. A cohort of 37  
1347 pediatric recipients of allogeneic HSCT was monitored prior to HSCT, at the time point  
1348 of HSCT, and post HSCT (median follow-up time 5.2 years). A range of patient  
1349 characteristics as well as disease outcomes, immune markers, immune cell counts,  
1350 and intestinal patterns of microbial community composition were recorded at the  
1351 noted time points (up to 12 months post HSCT). See Table S1 for details regarding the  
1352 patient characteristics. (B) Plasma hBD2 concentrations over time and in comparison  
1353 to healthy controls. The Y-axis was log<sub>10</sub>-transformed for better visualization. Zeros  
1354 were replaced with 1 to avoid undefined values on the log-transformed axis. Asterisks  
1355 indicate whether the concentrations at each respective time point were significantly  
1356 different from any of the other time points (showing the maximum significance level).  
1357 (C) Bacterial alpha-diversity, measured by inverse Simpson index, of the intestinal  
1358 microbiome shown with log<sub>10</sub>-transformed y-axis. (D) Rank abundance curve  
1359 displaying the 8 most abundant taxonomic families in the dataset (comprising 98 fecal  
1360 samples).

1361

1362 **Figure 2. Correlations between immune markers, immune cell counts, and outcomes**  
1363 **in patients undergoing HSCT.** A) Pairwise Spearman's correlation between immune  
1364 markers and immune cell counts in HSCT patients ( $n=37$ ) that were determined to be  
1365 significant in a permutational multivariate analysis of variance using (microbial)  
1366 distance matrices (adonis) (See Table S2). Positive and negative correlations are  
1367 represented by red or blue circles, respectively, and the size of circles and intensity of  
1368 color refer to the strength of the correlation. Correlations that are significant ( $P \leq 0.05$ )  
1369 are indicated by a black outline of the circle. (B) Natural killer (NK) and total B cell  
1370 (mature and immature) reconstitution in month +2 with respect to the maximum  
1371 acute GvHD (aGvHD) grade (0-I vs. II-IV) in HSCT patients ( $n=37$ ). Abbreviations:  
1372 hBD2\_pre, hBD2\_w0, hBD2\_w1, hBD2\_w2: plasma human beta-defensin 2  
1373 concentration pre-HSCT, on the day of HSCT, and in weeks +1 and +2, respectively;

1374 mono\_pre, mono\_w3: monocyte counts pre-HSCT and in week +3, respectively;  
1375 neutro\_m3: neutrophil count in month +3; CD8+\_m1: CD8+ T cell counts in month +1;  
1376 Age: Recipient age at time point of transplantation; NK\_m1, NK\_m2: Natural killer cell  
1377 counts in months +1 and +2, respectively; B\_m2, mat\_B\_m2, immat\_B\_m2: all,  
1378 mature, and immature B cell counts in month +2; CD4+\_m2: CD4+ T cell counts in  
1379 month +2; Citr\_pre, Citr\_w1: plasma citrulline levels pre-HSCT and in week +1,  
1380 respectively; CRP, CRP\_w1, CRP\_w5, CRP\_w6, CRP\_m3, CRP\_m6: C-reactive protein  
1381 levels at time points simultaneous to microbiome characterization, in weeks +1, +5,  
1382 and +6, and in months +3 and +6, respectively. \*  $P < 0.05$ , \*\*  $P < 0.01$  and \*\*\*  $P <$   
1383  $0.001$ .

1384

1385 **Figure 3. Sparse partial least squares (sPLS) regression of immune parameters and**  
1386 **intestinal bacterial taxa during HSCT.** (A) Correlation circle plot for the first two sPLS  
1387 dimensions with correlations displayed for  $>0.2/ <-0.2$ . The two grey circles indicate  
1388 correlation coefficient radii at 0.5 and 1.0. Bacterial operational taxonomic units  
1389 (OTUs) are displayed as circles, and are colored according to the cluster they are  
1390 affiliated with (Cluster 1: blue; Cluster 2: orange; Cluster 3: grey). Variables projected  
1391 closely to each other are positively correlated. Variables projected diametrically  
1392 opposite from each other are negatively correlated. Variables situated  
1393 perpendicularly to each other are not correlated. (B) Clustered image map (CIM) of  
1394 the first two sPLS dimensions, displaying pairwise correlations between OTUs  
1395 (bottom) and clinical variables (left). Red and blue indicate positive and negative  
1396 correlations, respectively. Hierarchical clustering (clustering method: complete  
1397 linkage, distance method: Pearson's correlation) was performed within the *mixOmics*  
1398 *cim()* function based on the sPLS regression model. An overview of the OTU  
1399 abundances in the individual samples is provided in Figure S3, and a list of the  
1400 individual OTUs and their cluster-affiliation is provided in Table S3. (C) Loading plots  
1401 of OTUs with maximum contributions on the first (left) and second (right) component,  
1402 respectively. The bars are coloured according to the cluster they are affiliated with.  
1403 The family-affiliation for each respective OTU is indicated by color (for legend see B).  
1404 Abbreviations of variables are the same as in Figure 2.

1405

1406 **Figure 4. Canonical correspondence analysis (CCpNA) of immune parameters and**  
1407 **intestinal bacterial taxa in patients undergoing HSCT.** Triplot showing dimension 1  
1408 and 2 of the CCpNA that included continuous clinical variables (arrows), categorical  
1409 variables (+), and OTUs (circles). Samples are depicted as triangles. OTUs with a  
1410 correlation of  $>0.2/ <-0.2$  in the sPLS analysis were included in the CCpNA model. Only  
1411 the variables and OTUs with a score  $>0.2/ <-0.2$  in at least one CCpNA dimension are  
1412 shown. The OTUs in the CCpNA plot are colored according to the cluster they were  
1413 affiliated with in the sPLS-based hierarchical clustering analysis, and the ellipses  
1414 present an 80% confidence interval, assuming normal distribution. For visualization

1415 purposes, this plot is a section focussing on the categorical and continuous variables  
1416 contributing to the ordination. The full size version of the CCpNA triplot, including all  
1417 samples and OTUs, is presented in Figure S2A. Abbreviations of variables are the same  
1418 as in Figure 2.

1419

1420 **Figure 5. Bacterial community state types over time in patients undergoing**  
1421 **allogeneic HSCT.** Patients are grouped into four outcome groups: 1. Patients who  
1422 developed no or mild aGvHD (grade 0-I) and survived vs. 2. Patients who did not  
1423 survive; 3. Patients who developed moderate to severe aGvHD (grade II-IV) and  
1424 survived vs. 4. Patients who did not survive. The day of commencement of aGVHD  
1425 grade II-IV and the day of death post HSCT are displayed to the right. Patients with  
1426 moderate to severe aGvHD (groups 3 and 4) most often harbored the  
1427 *Lactobacillaceae*-dominated community state type 1 (CST 1), especially at late time  
1428 points. CST2, dominated by *Ruminococcaceae* and *Lachnospiraceae*, did not persist  
1429 after HSCT in any of the patients in groups 3 and 4. A detailed overview of the CSTs is  
1430 provided in Figure S4, and information about individual OTUs and their cluster-  
1431 affiliation is provided in Table S3.

1432

1433 **Figure 6. Longitudinal profiles of microbial community composition and immune**  
1434 **markers in non-survivors with aGvHD.** Abundances of *Lactobacillaceae* increased  
1435 predominantly after aGvHD onset in patients who died during the follow-up period.  
1436 Patient P24 developed chronic GvHD on day +187, relapsed on day +548 and died on  
1437 day +784 due to graft rejection after re-transplantation. Patient P26 died on day +602  
1438 after a relapse on day +442 followed by re-transplantation on day +518. Patient P30  
1439 died on day +192 after relapse on day +77. Patient P26 and P30 had no reported  
1440 bacterial infections during the depicted period. Abbreviations: InvSimpson, inverse  
1441 Simpson diversity index; hBD2, human beta-defensin 2; aGvHD, acute graft-versus-  
1442 host-disease; inf, bacterial infection.

A)

Allo-Hematopoietic  
Stem Cell Transplantation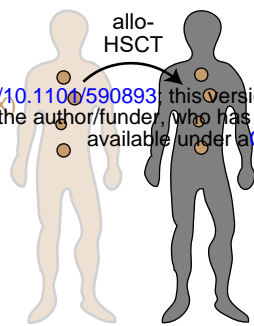

Patient characteristics:

Age  
 Disease at transplantation  
 Conditioning regimen  
 Stem cell source  
 Acute graft-versus-host-disease (aGVHD)  
 Survival (death/alive at 5 yrs post HSCT)

Timepoints of data availability

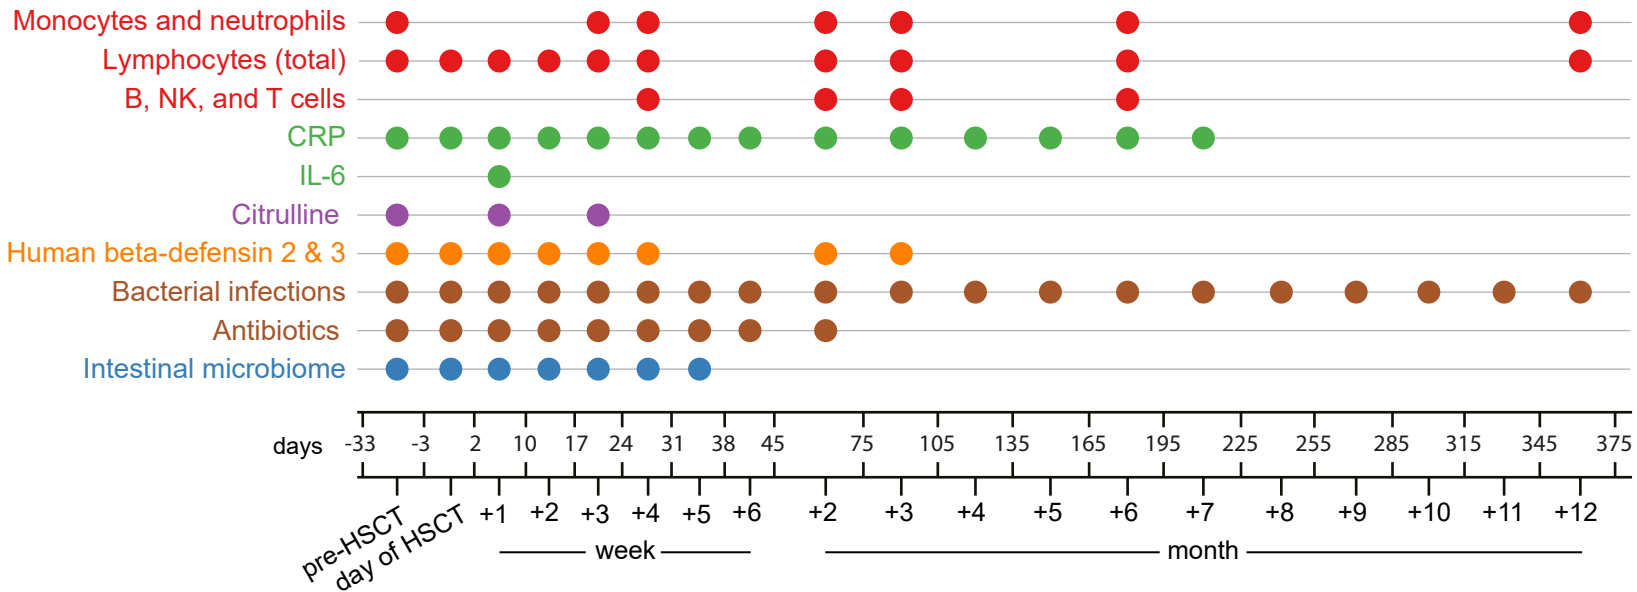

B)

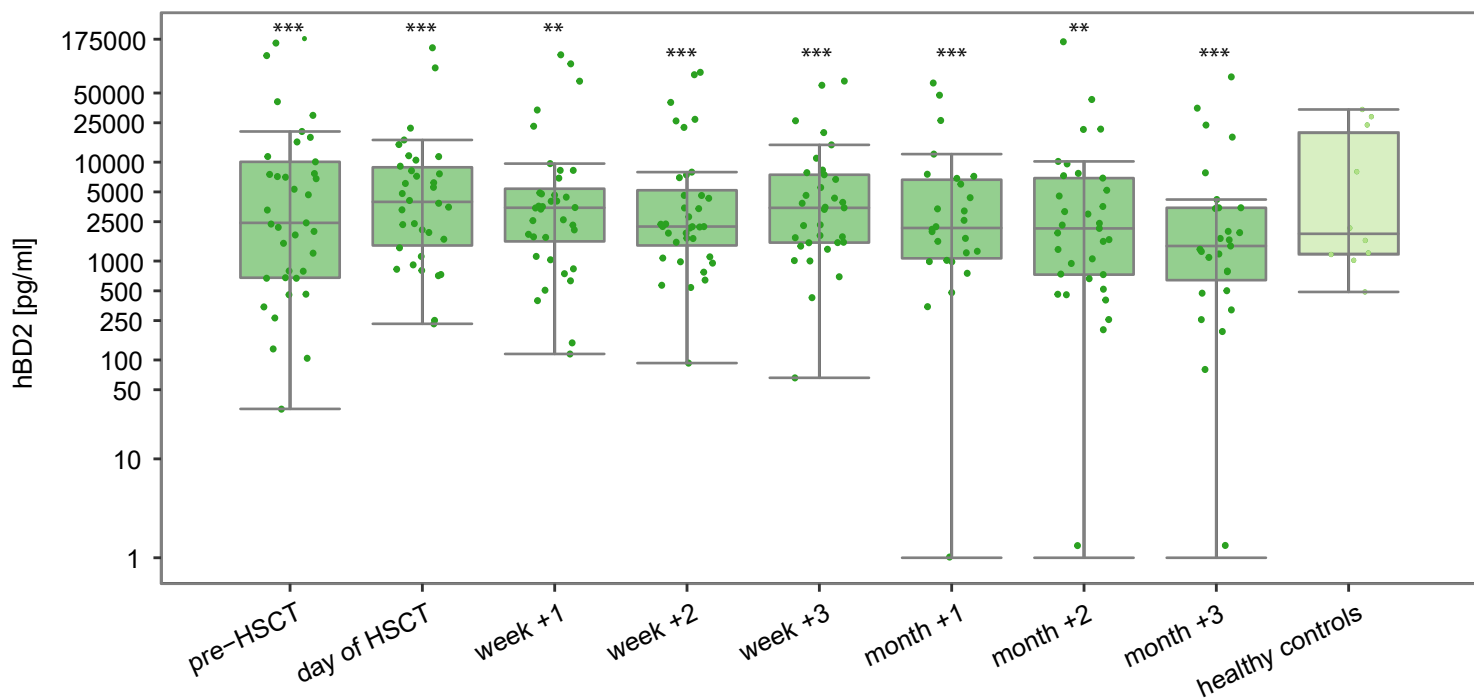

C)

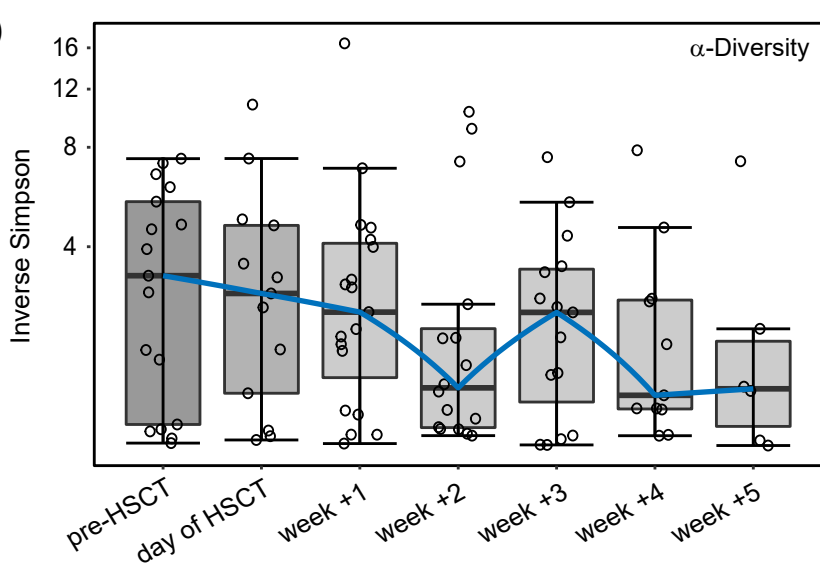

D)

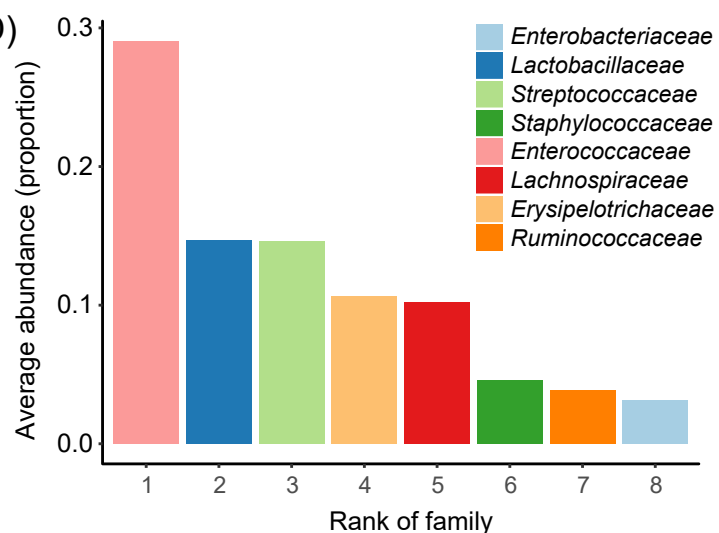



A)

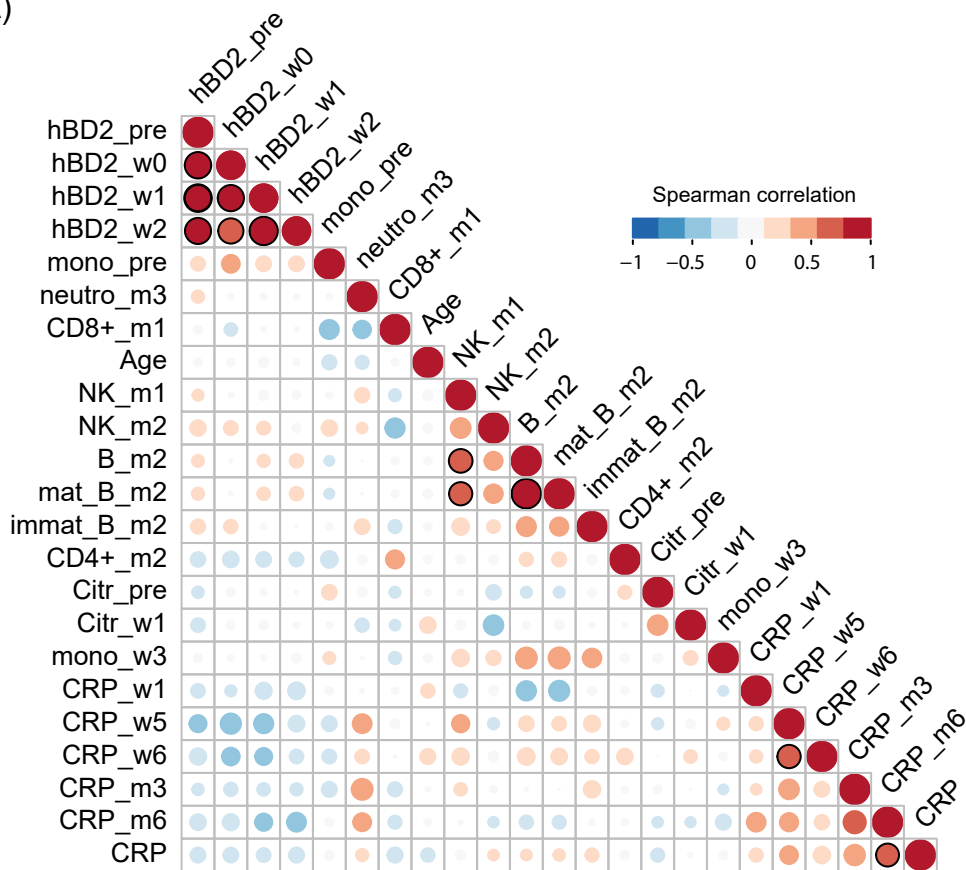

B)

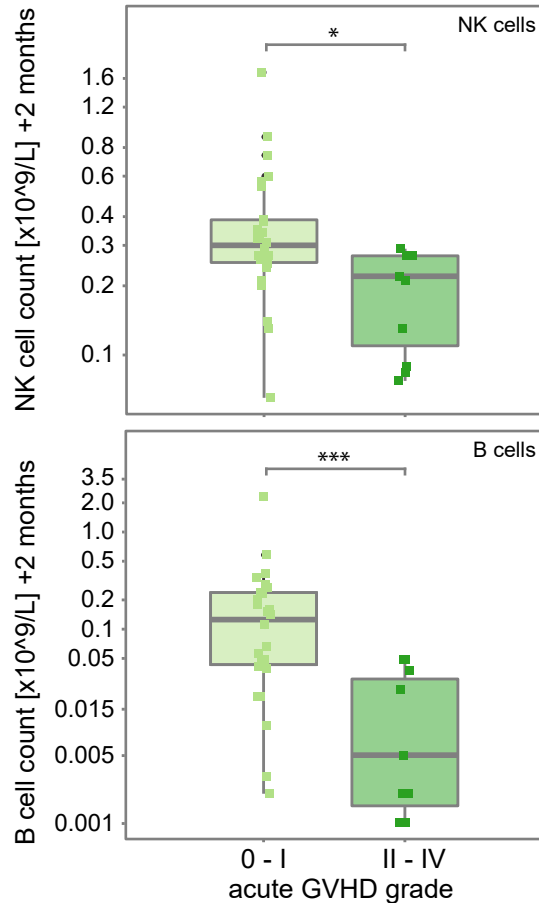

A)

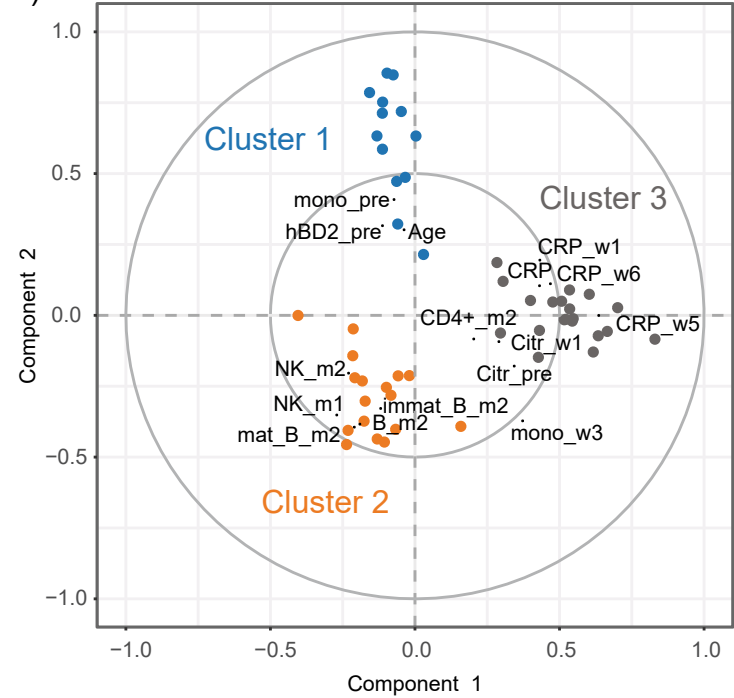

G)

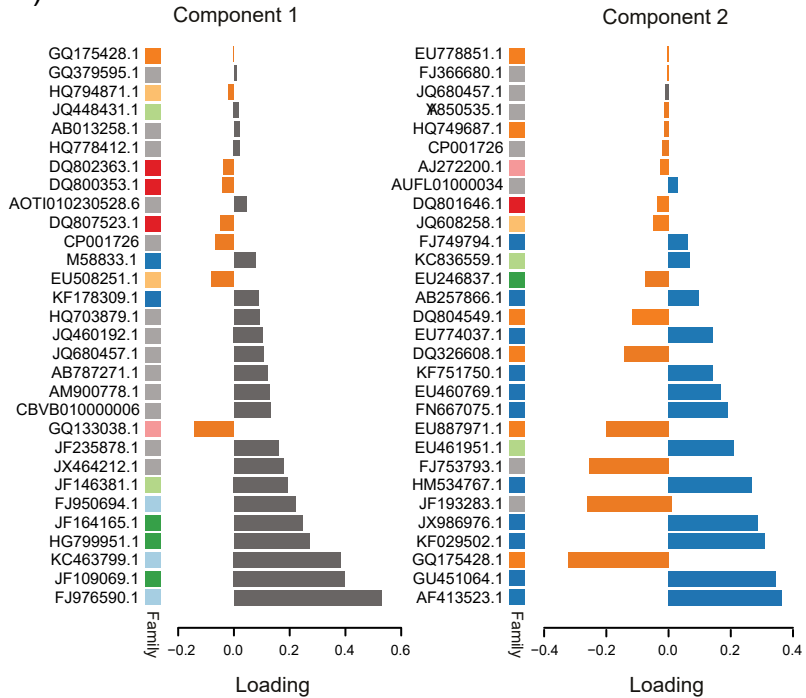

B)

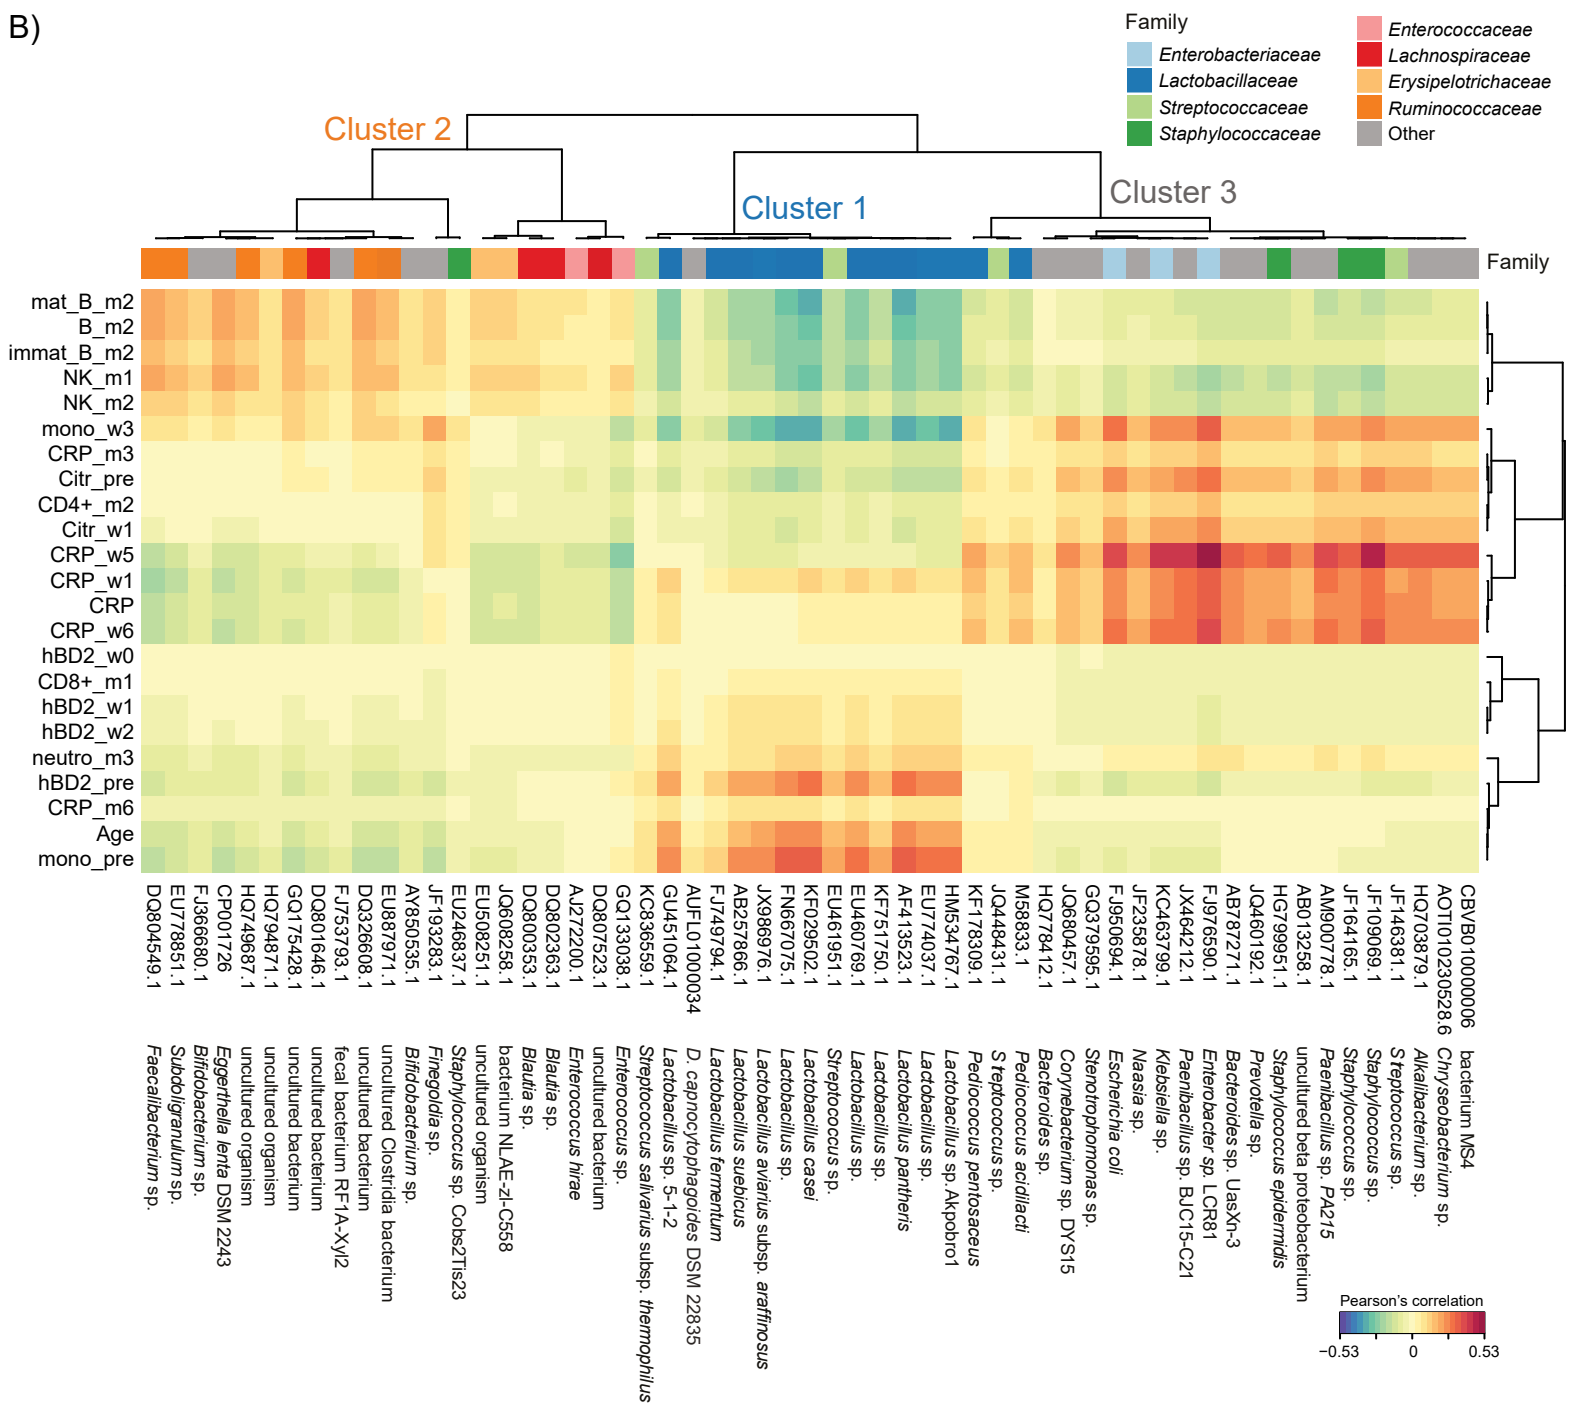



Community state type (CST) ● 1 ● 2 ● 3 ● 4

0-I II-IV Death

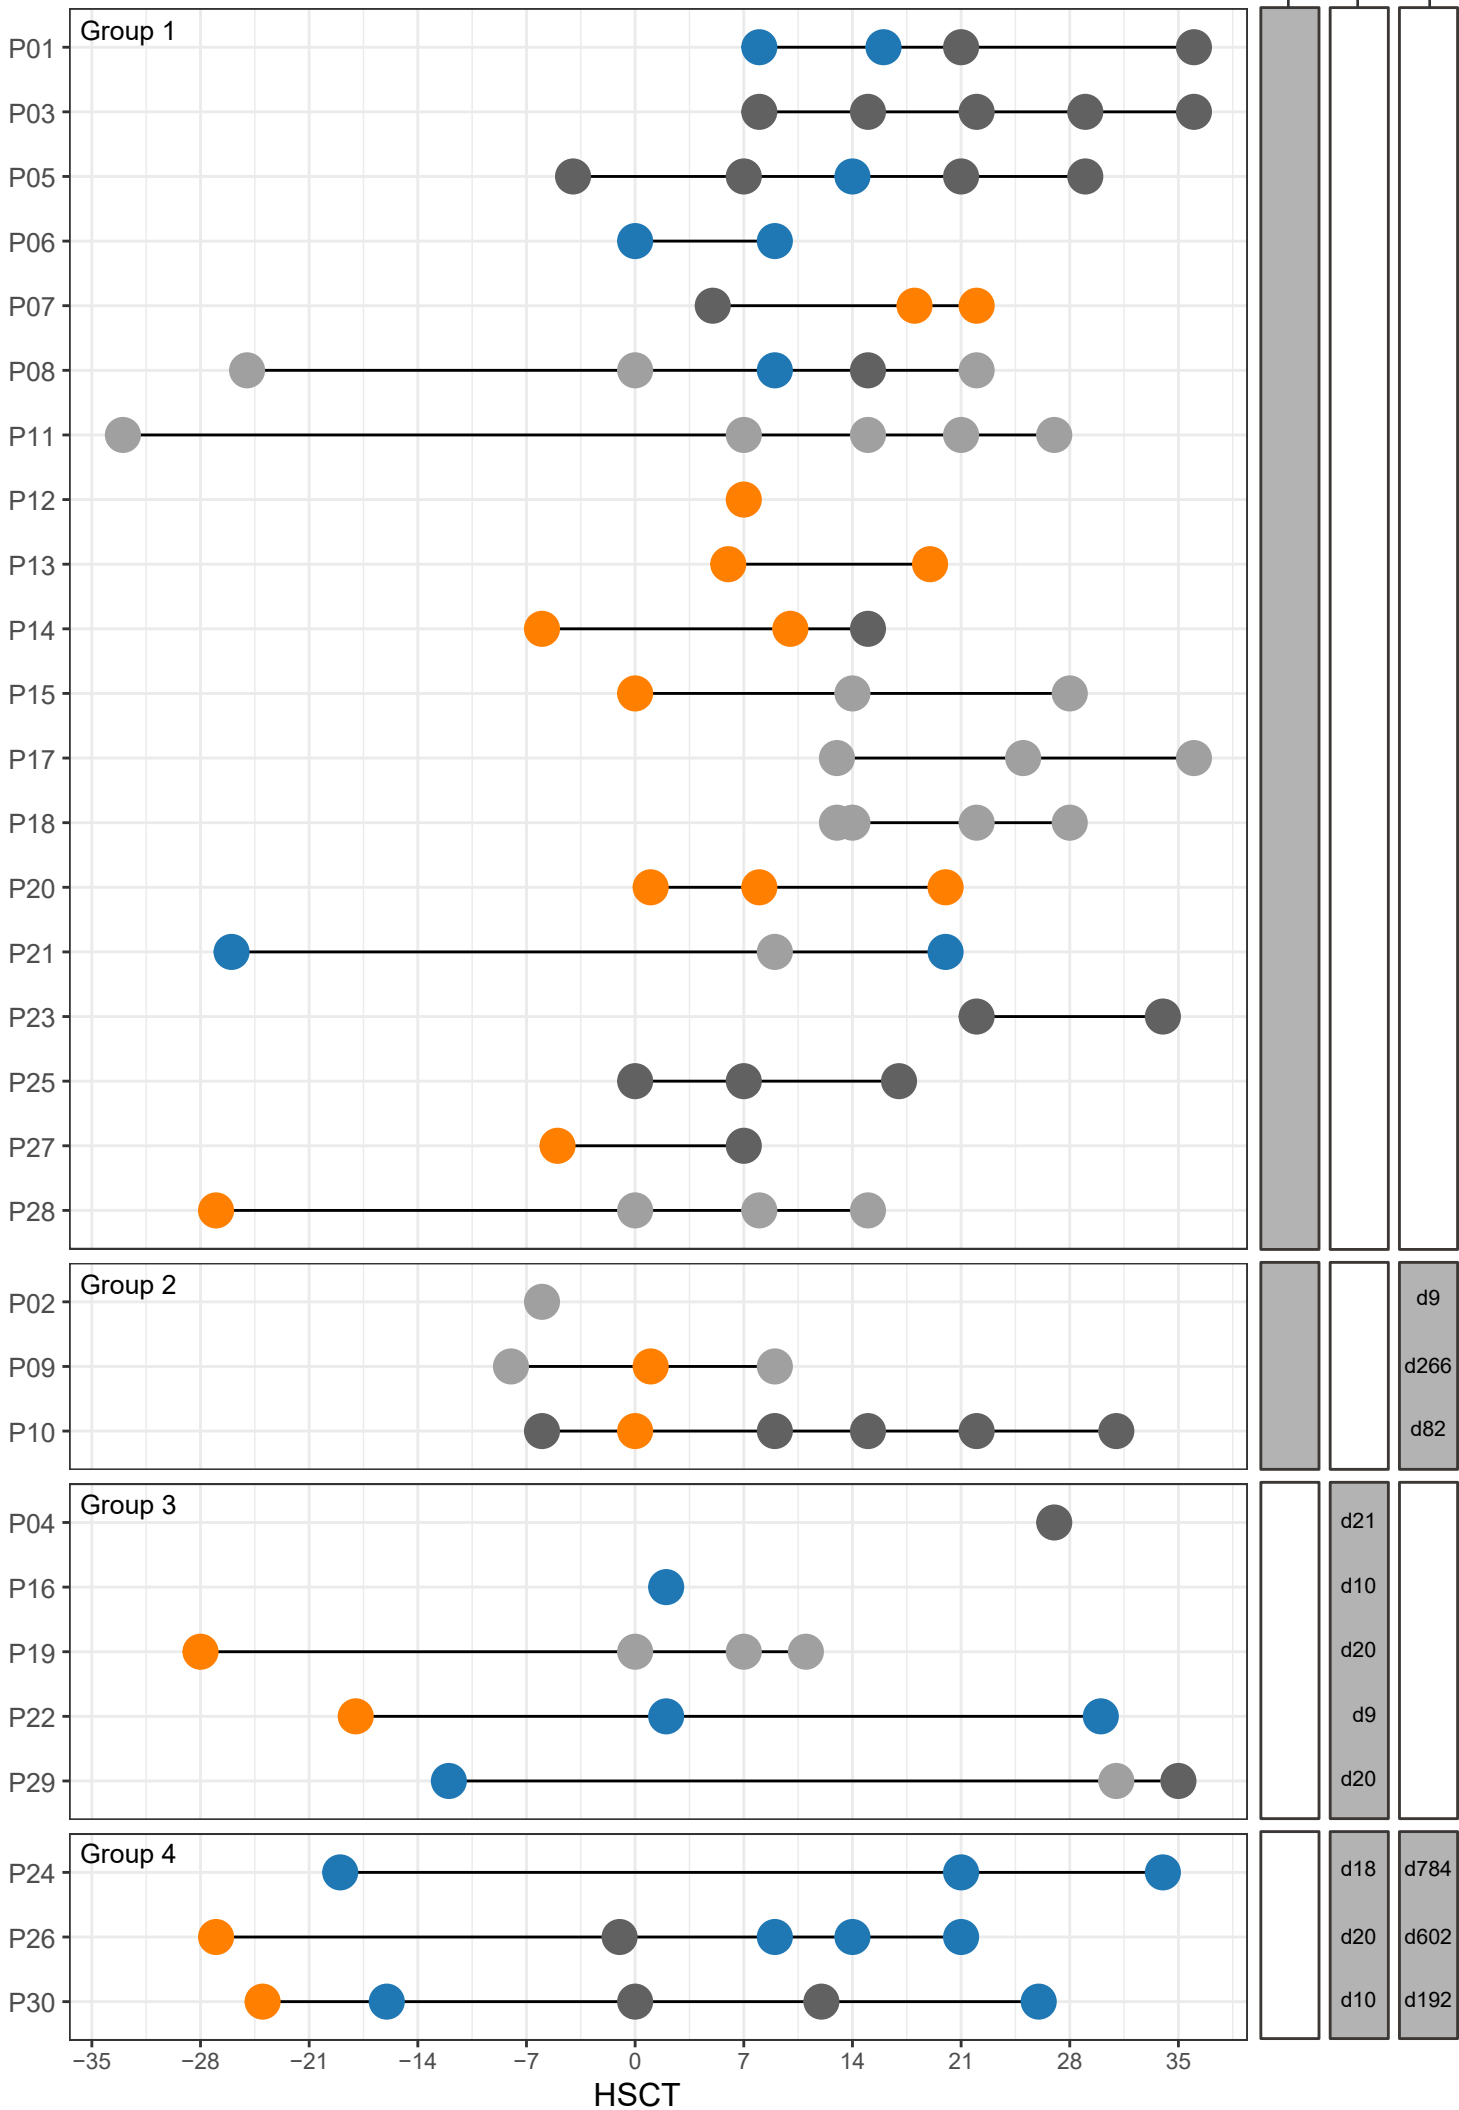

Patient 24

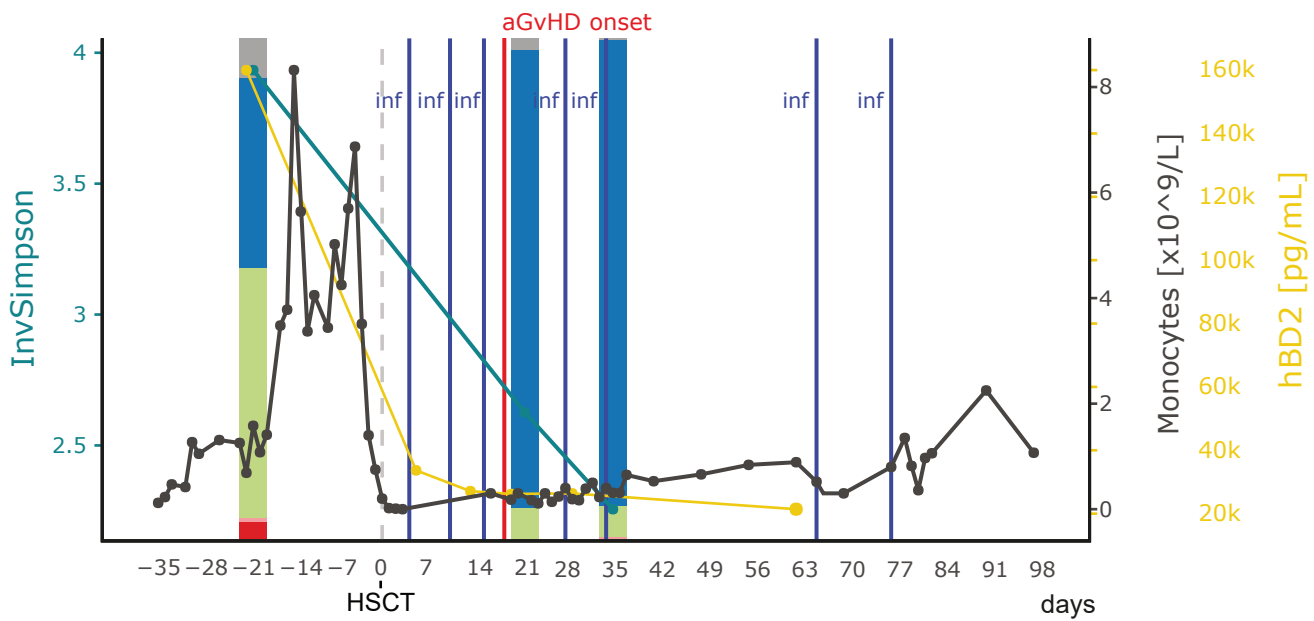

Patient 26

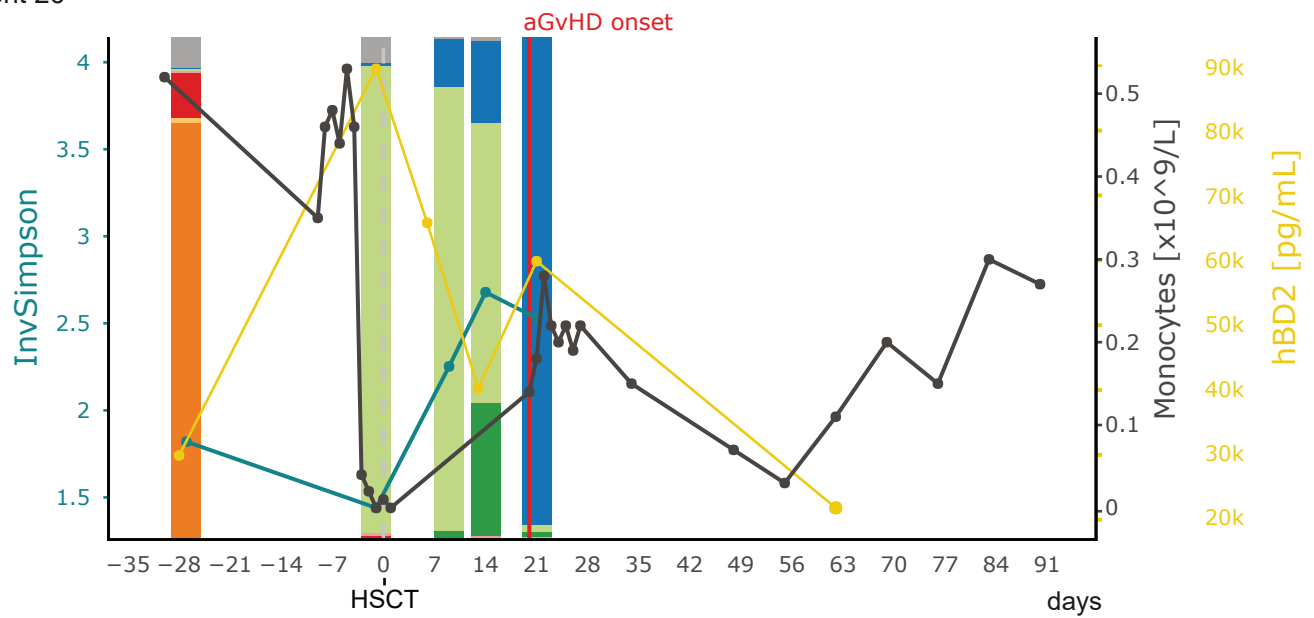

Patient 30

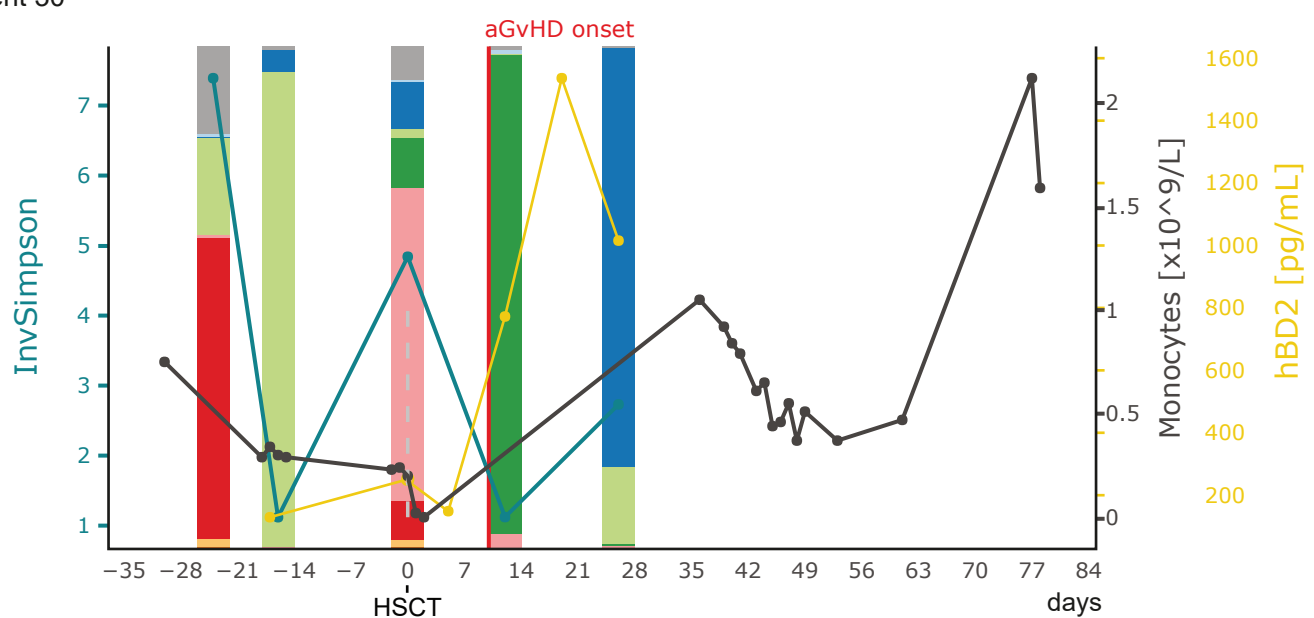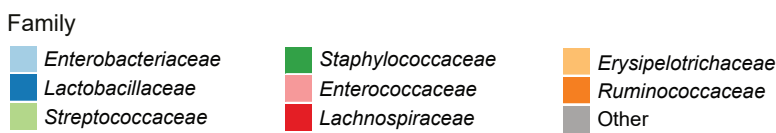

| Characteristics                     |                                                        | Number of patients (all) | Percentage of all patients (%) | Number of patients (Sub-cohort for which the microbiota was characterized) | Percentage of sub-cohort (%) |
|-------------------------------------|--------------------------------------------------------|--------------------------|--------------------------------|----------------------------------------------------------------------------|------------------------------|
| Transplant recipients               |                                                        | 37                       | 100                            | 30*                                                                        | 81.1                         |
| Average recipient age in years      |                                                        | 8.2 (Range: 1.1-18.0)    | NA                             | 7.8 (Range: 1.1-16.5)                                                      | NA                           |
| Intestinal microbiome characterized | At 1-2 timepoints                                      | NA                       | NA                             | 8                                                                          | 26.7                         |
|                                     | At 3-4 timepoints                                      | NA                       | NA                             | 15                                                                         | 50                           |
|                                     | At 5-6 timepoints                                      | NA                       | NA                             | 8                                                                          | 26.7                         |
| Patient sex                         | Female                                                 | 15                       | 40.5                           | 12                                                                         | 40                           |
|                                     | Male                                                   | 22                       | 59.5                           | 18                                                                         | 60                           |
| Disease at transplantation          | malignant hematologic diseases                         | 23                       | 62.2                           | 17                                                                         | 56.7                         |
|                                     | Severe aplastic anemia                                 | 5                        | 13.5                           | 5                                                                          | 16.7                         |
|                                     | Other benign disorders including immunodeficiencies    | 9                        | 24.3                           | 8                                                                          | 26.7                         |
| Donor type                          | HLA-matched sibling                                    | 7                        | 18.9                           | 6                                                                          | 20                           |
|                                     | HLA-matched unrelated donor (9/10 or 10/10 match)      | 27                       | 73                             | 22                                                                         | 73.3                         |
|                                     | HLA-mismatched umbilical cord blood donor (8/10 match) | 3                        | 8.1                            | 2                                                                          | 6.7                          |
| Stem cell source                    | Bone marrow                                            | 30                       | 81.1                           | 25                                                                         | 83.3                         |
|                                     | Umbilical cord blood                                   | 4                        | 10.8                           | 3                                                                          | 10                           |
|                                     | Peripheral blood                                       | 2                        | 5.4                            | 1                                                                          | 3.3                          |
|                                     | Bone marrow and umbilical cord blood                   | 1                        | 2.7                            | 1                                                                          | 3.3                          |
| Conditioning regimen                | TBI + CY / TBI + VP16                                  | 10                       | 27.1                           | 10                                                                         | 33.3                         |
|                                     | Combinations of BU, CY, VP16 and MEL                   | 18                       | 48.7                           | 12                                                                         | 40                           |
|                                     | Fludarabine-based conditioning                         | 9                        | 24.3                           | 8                                                                          | 26.7                         |



|                                                      |                                                    |    |      |    |      |
|------------------------------------------------------|----------------------------------------------------|----|------|----|------|
| <b>Anti-thymocyte globulin treatment</b>             |                                                    | 28 | 75.7 | 23 | 76.7 |
| <b>Antibiotics pre- and post-HSCT</b>                |                                                    | 37 | 100  | 30 | 100  |
| <b>Sex mismatch (female donor to male recipient)</b> |                                                    | 4  | 10   | 3  | 10   |
| <b>Acute GvHD</b>                                    | <b>Grade 0-I</b>                                   | 26 | 70.3 | 22 | 73.3 |
|                                                      | <b>Grade II-IV</b>                                 | 11 | 29.2 | 8  | 26.7 |
| <b>Chronic GvHD within 24 months</b>                 |                                                    | 8  | 18.9 | 5  | 16.7 |
| <b>Bacterial infections</b>                          | <b>At least one registered bacterial infection</b> | 25 | 67.6 | 19 | 63.3 |
|                                                      | <b>No registered bacterial infection</b>           | 12 | 32.4 | 11 | 36.7 |
| <b>Overall Survival**</b>                            | <b>Alive</b>                                       | 30 | 81.1 | 24 | 80   |
|                                                      | <b>Dead</b>                                        | 7  | 18.9 | 6  | 20   |
| <b>Relapse of primary malignancy</b>                 |                                                    | 6  | 16.2 | 7  | 23.3 |
| <b>Non-relapse mortality</b>                         |                                                    | 2  | 5.4  | 1  | 3.3  |
| <b>Re-transplantation</b>                            |                                                    | 3  | 8.1  | 4  | 13.3 |

\*29/37 +1, one patient's microbiome was characterized but for which hBD2 was not measured

\*\* Mean follow-up time after HSCT: 62.1 months (range: 48.9 – 75.8 months)

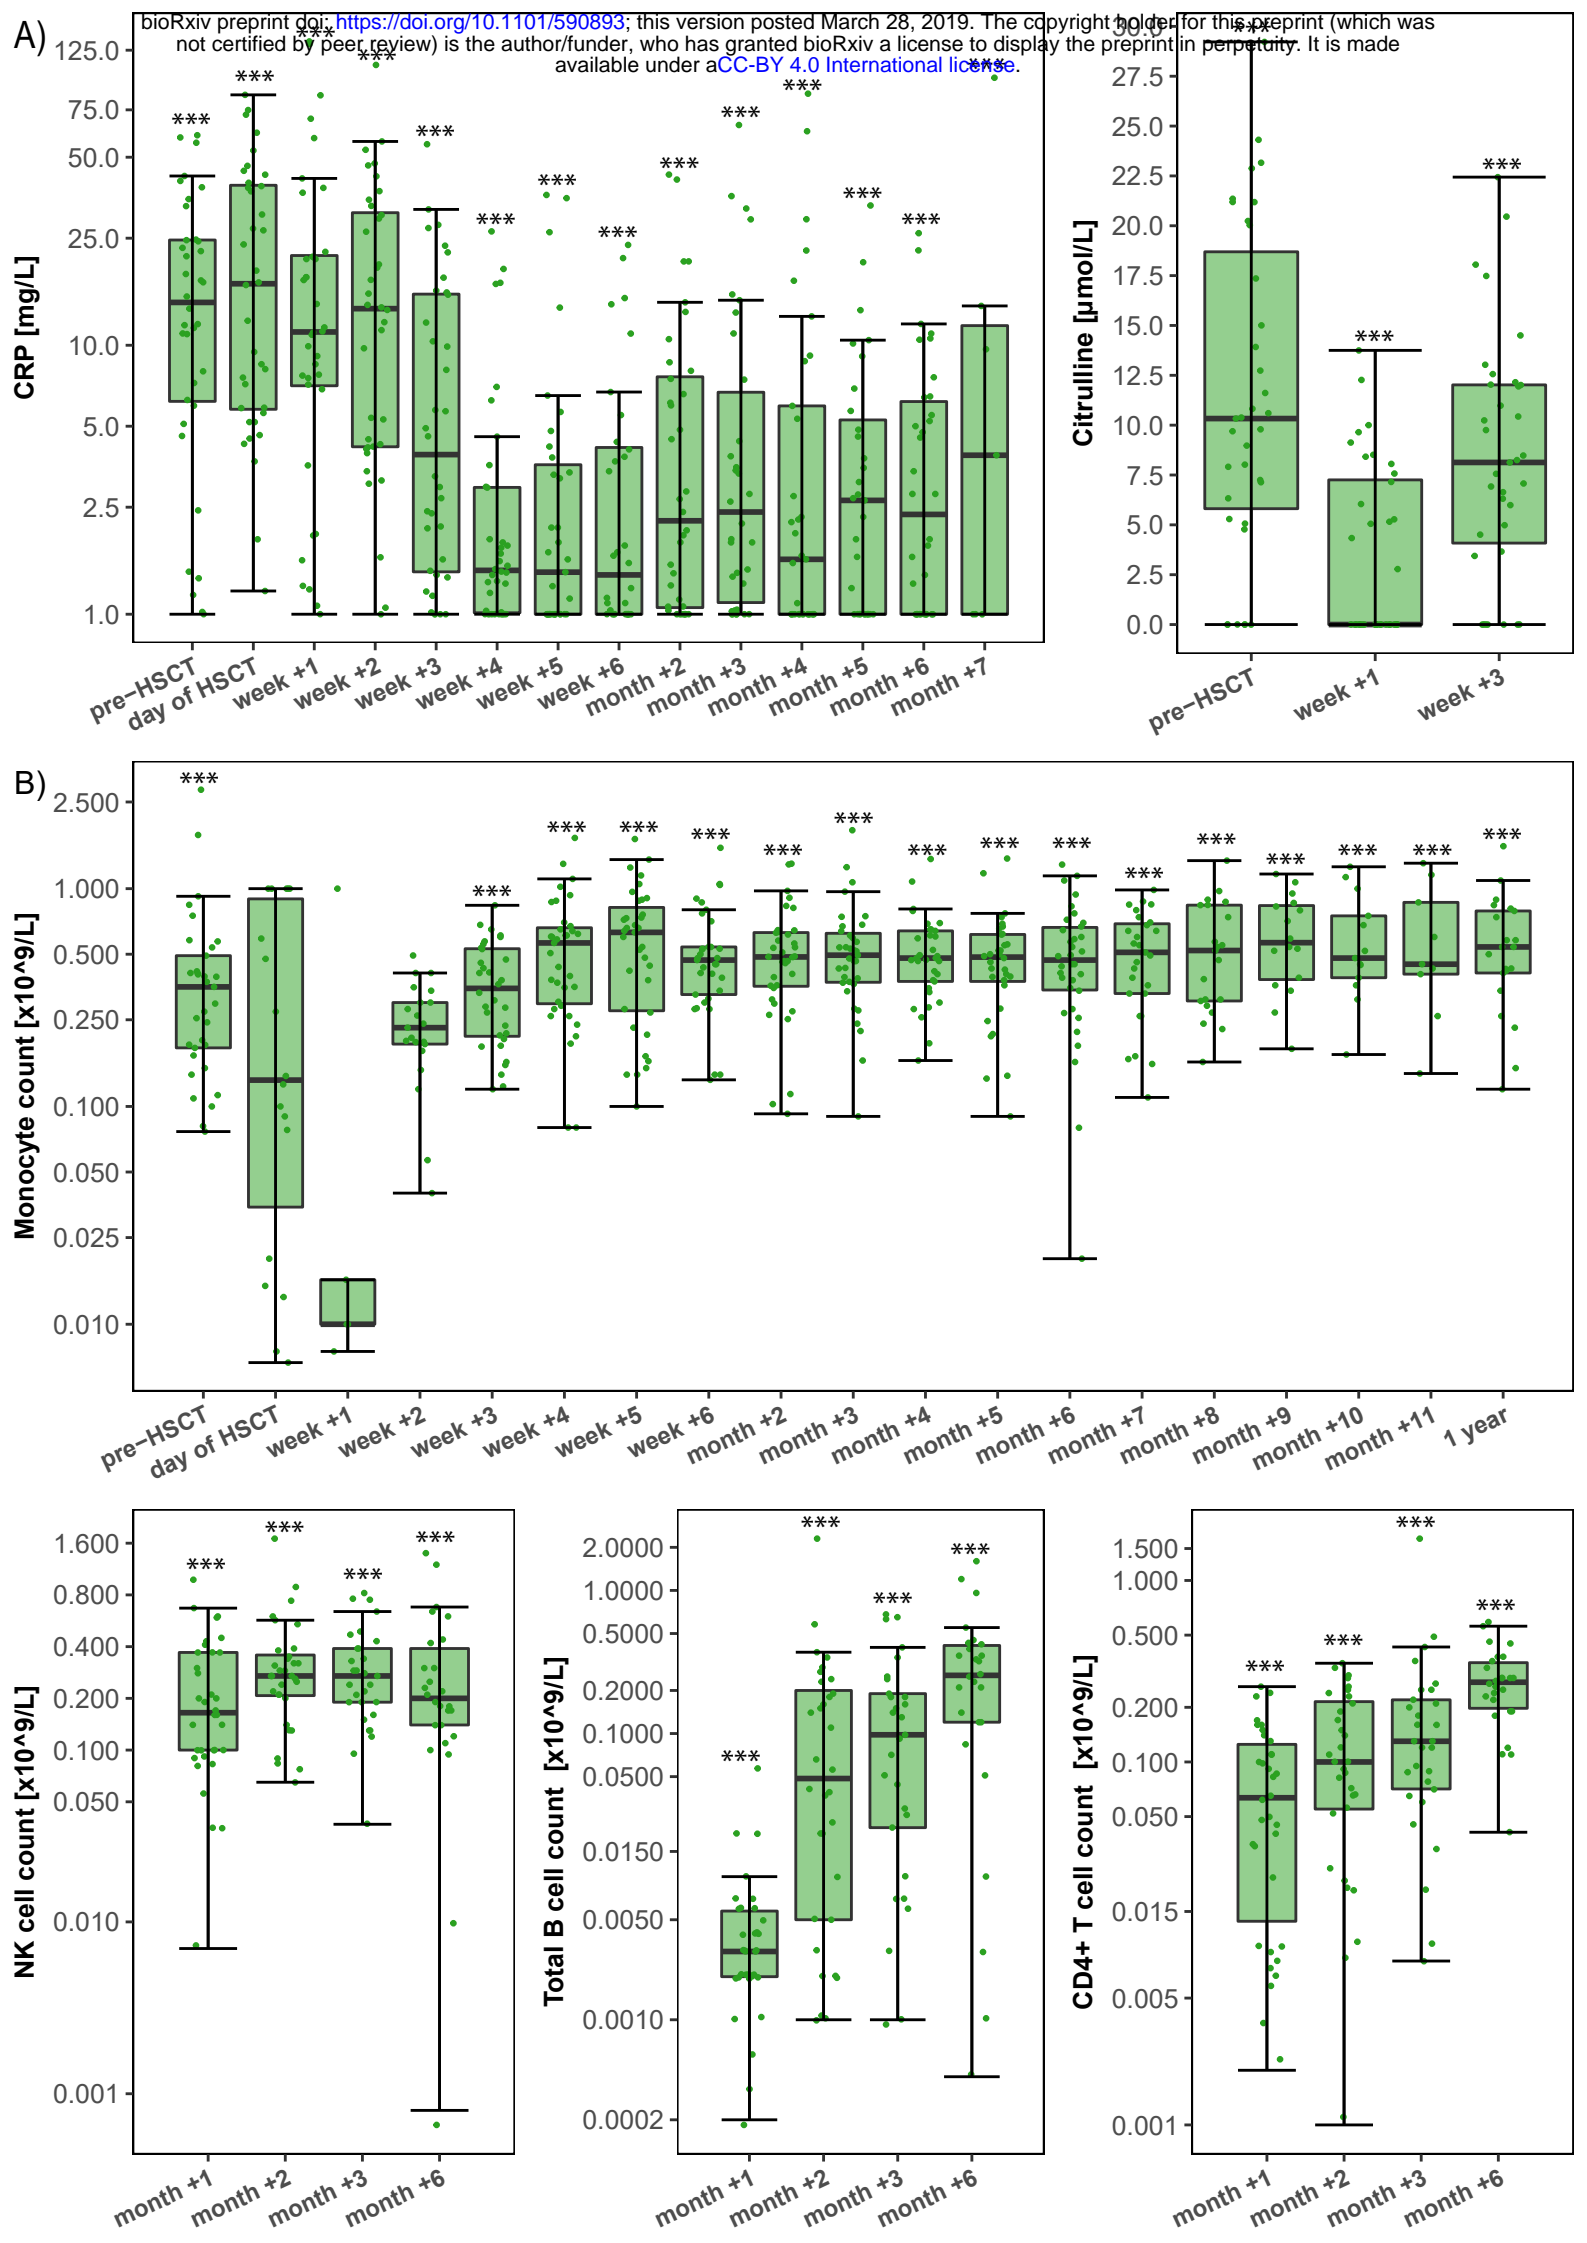

Continuous variables → Manhattan distance matrix  
**Permutational multivariate analysis of variance (adonis)**

Continuous variables,  $P \leq 0.05$

Pairwise correlation  
between continuous variables  
**Spearman's rank correlation tests**

OTU abundances → continuous variables  
**Sparse partial least squares (sPLS) regression**

↓ OTUs with a  
correlation  $>0.2 / <-0.2$

OTU abundances ↔ continuous & categorical variables  
**Canonical correspondence analysis (CCpNA)**

**Multi-table analyses & Clustering**

**Multivariate analyses**

Changes in individual  
continuous variables over time  
**Friedman tests & Kendall's *W***  
Supplemental univariate analyses

Jensen-Shannon distance matrix:  
Partitioning around medoid (PAM)  
clustering into  
**Community state types (CSTs)**  
Supplemental clustering approach

| Variable             | SumOfSqs | F      | P-value      |
|----------------------|----------|--------|--------------|
| hBD2_sim             | 9763     | 0.4635 | 0.915        |
| <b>hbd2_pre</b>      | 89958    | 4.3373 | <b>0.001</b> |
| <b>hbd2_w0</b>       | 39432    | 1.9012 | <b>0.037</b> |
| <b>hbd2_w1</b>       | 62425    | 3.0098 | <b>0.007</b> |
| <b>hbd2_w2</b>       | 70010    | 3.3755 | <b>0.004</b> |
| hbd2_w3              | 32106    | 1.5480 | 0.088        |
| hbd2_m2              | 33806    | 1.6300 | 0.104        |
| <b>CRP_sim</b>       | 28707    | 1.3629 | <b>0.015</b> |
| CRP_pre              | 15714    | 0.8102 | 0.631        |
| CRP_w0               | 22573    | 1.1639 | 0.280        |
| <b>CRP_w1</b>        | 51055    | 2.6324 | <b>0.011</b> |
| CRP_w2               | 34122    | 1.7593 | 0.098        |
| CRP_w3               | 41269    | 2.1278 | 0.055        |
| CRP_m1               | 27106    | 1.3976 | 0.169        |
| <b>CRP_w5</b>        | 41965    | 2.1637 | <b>0.026</b> |
| <b>CRP_w6</b>        | 38860    | 2.0036 | <b>0.029</b> |
| CRP_m2               | 31527    | 1.6255 | 0.095        |
| <b>CRP_m3</b>        | 39972    | 2.0610 | <b>0.034</b> |
| CRP_m4               | 23961    | 1.2354 | 0.252        |
| <b>CRP_m6</b>        | 39945    | 2.0596 | <b>0.024</b> |
| pIL6_w1              | 23180    | 1.1431 | 0.311        |
| <b>Citr_pre</b>      | 78105    | 3.8519 | <b>0.002</b> |
| <b>Citr_w1</b>       | 42029    | 2.0727 | <b>0.021</b> |
| Citr_w3              | 33872    | 1.6705 | 0.069        |
| CD3+_m1              | 28654    | 1.4500 | 0.123        |
| CD3+_m2              | 17891    | 0.9054 | 0.501        |
| CD4+_m1              | 30266    | 1.5316 | 0.090        |
| <b>CD4+_m2</b>       | 38132    | 1.9296 | <b>0.037</b> |
| <b>CD8+_m1</b>       | 38615    | 1.9541 | <b>0.029</b> |
| CD8+_m2              | 21275    | 1.0766 | 0.337        |
| B_m1                 | 26588    | 1.3454 | 0.166        |
| <b>B_m2</b>          | 41803    | 2.1154 | <b>0.025</b> |
| mat_B_m1             | 26622    | 1.3472 | 0.167        |
| <b>mat_B_m2</b>      | 41697    | 2.1100 | <b>0.027</b> |
| immat_B_m1           | 28078    | 1.4208 | 0.133        |
| <b>immat_B_m2</b>    | 40142    | 2.0313 | <b>0.029</b> |
| <b>NK_m1</b>         | 63891    | 3.2331 | <b>0.002</b> |
| <b>NK_m2</b>         | 44566    | 2.2552 | <b>0.020</b> |
| Lymphocyte_count_sim | 21541    | 1.0227 | 0.610        |
| Lymphocyte_m2        | 22196    | 1.1232 | 0.324        |

|                       |       |        |              |
|-----------------------|-------|--------|--------------|
| Lymphocyte_m3         | 24450 | 1.2373 | 0.224        |
| Lymphocyte_m6         | 26278 | 1.3298 | 0.177        |
| Lymphocyte_1y         | 29658 | 1.5008 | 0.114        |
| <b>mean_mono_pre</b>  | 47349 | 2.3109 | <b>0.013</b> |
| <b>mean_mono_w3</b>   | 64242 | 3.1353 | <b>0.002</b> |
| mean_mono_m1          | 17924 | 0.8748 | 0.561        |
| mean_mono_m2          | 25930 | 1.2655 | 0.187        |
| mean_mono_m3          | 18269 | 0.8916 | 0.516        |
| mean_mono_m6          | 1579  | 0.7708 | 0.654        |
| mean_neutro_pre       | 25198 | 1.2298 | 0.225        |
| mean_neutro_w3        | 31161 | 1.5208 | 0.149        |
| mean_neutro_m1        | 29036 | 1.4171 | 0.137        |
| mean_neutro_m2        | 16656 | 0.8129 | 0.611        |
| <b>mean_neutro_m3</b> | 48466 | 2.3653 | <b>0.010</b> |
| mean_neutro_m6        | 15960 | 0.7789 | 0.653        |

| OTU number   | Phylum | Order             | Family             | Genus/Species/Description                    | Cluster |     |
|--------------|--------|-------------------|--------------------|----------------------------------------------|---------|-----|
|              |        |                   |                    |                                              | sPLS    | CST |
| HM534767.1   | F      | Lactobacillales   | Lactobacillaceae   | Lactobacillus sp. Akpobro1                   | 1       | 1   |
| AF413523.1   | F      | Lactobacillales   | Lactobacillaceae   | Lactobacillus pantheris                      | 1       | 1   |
| KF751750.1   | F      | Lactobacillales   | Lactobacillaceae   | Lactobacillus sp.                            | 1       | 1   |
| AB257866.1   | F      | Lactobacillales   | Lactobacillaceae   | Lactobacillus suebicus                       | 1       | 1   |
| JX986976.1   | F      | Lactobacillales   | Lactobacillaceae   | Lactobacillus aviarius subsp. araffinosus    | 1       | 1   |
| GU451064.1   | F      | Lactobacillales   | Lactobacillaceae   | Lactobacillus sp. 5-1-2                      | 1       | 1   |
| EU774037.1   | F      | Lactobacillales   | Lactobacillaceae   | Lactobacillus sp.                            | 1       | 1   |
| FN667075.1   | F      | Lactobacillales   | Lactobacillaceae   | Lactobacillus sp.                            | 1       | 1   |
| EU461951.1   | F      | Lactobacillales   | Streptococcaceae   | Streptococcus sp.                            | 1       | 1   |
| EU460769.1   | F      | Lactobacillales   | Lactobacillaceae   | Lactobacillus sp.                            | 1       | 1   |
| KC836559.1   | F      | Lactobacillales   | Streptococcaceae   | Streptococcus salivarius subsp. thermophilus | 1       | 1   |
| FJ749794.1   | F      | Lactobacillales   | Lactobacillaceae   | Lactobacillus fermentum                      | 1       | 1   |
| KF029502.1   | F      | Lactobacillales   | Lactobacillaceae   | Lactobacillus casei                          | 1       | 1   |
| AUFL01000034 | B      | Bacteroidales     | Porphyromonadaceae | Dysgonomonas capnocytophagoide s DSM 22835   | 1       | 1   |
| DQ801646.1   | F      | Clostridiales     | Lachnospiraceae    | uncultured bacterium                         | 2       | 2   |
| EU246837.1   | F      | Bacillales        | Staphylococcaceae  | Staphylococcus sp. Cobs2Tis23                | 2       | 4   |
| DQ804549.1   | F      | Clostridiales     | Ruminococcaceae    | Faecalibacterium sp.                         | 2       | 2   |
| FJ366680.1   | A      | Bifidobacteriales | Bifidobacteriaceae | Bifidobacterium sp.                          | 2       | 2   |



|            |   |                           |                              |                                   |   |   |
|------------|---|---------------------------|------------------------------|-----------------------------------|---|---|
| HQ749687.1 | F | <i>Clostridiales</i>      | <i>Ruminococcaceae</i>       | uncultured bacterium              | 2 | 2 |
| FJ753793.1 | F | <i>Clostridiales</i>      | <i>Peptostreptococcaceae</i> | swine fecal bacterium RF1A-Xyl2   | 2 | 2 |
| DQ800353   | F | <i>Clostridiales</i>      | <i>Lachnospiraceae</i>       | <i>Blautia</i> sp.                | 2 | 2 |
| EU887971.1 | F | <i>Clostridiales</i>      | <i>Ruminococcaceae</i>       | uncultured Clostridia bacterium   | 2 | 2 |
| JQ608258.1 | F | <i>Erysipelotrichales</i> | <i>Erysipelotrichaceae</i>   | bacterium NLAE-zl-C558            | 2 | 2 |
| AY850535.1 |   | <i>Bifidobacteriales</i>  | <i>Bifidobacteriaceae</i>    | <i>Bifidobacterium</i> sp.        | 2 | 2 |
| DQ326608.1 | F | <i>Clostridiales</i>      | <i>Ruminococcaceae</i>       | uncultured bacterium              | 2 | 2 |
| AJ272200.1 | F | <i>Lactobacillales</i>    | <i>Enterococcaceae</i>       | <i>Enterococcus hirae</i>         | 2 | 4 |
| EU508251.1 | F | <i>Erysipelotrichales</i> | <i>Erysipelotrichaceae</i>   | uncultured bacterium              | 2 | 2 |
| DQ807523.1 | F | <i>Clostridiales</i>      | <i>Lachnospiraceae</i>       | uncultured bacterium              | 2 | 2 |
| CP001726   | A | <i>Coriobacteriales</i>   | <i>Coriobacteriaceae</i>     | <i>Eggerthella lenta</i> DSM 2243 | 2 | 2 |
| HQ794871.1 | F | <i>Erysipelotrichales</i> | <i>Erysipelotrichaceae</i>   | uncultured organism               | 2 | 2 |
| JF193283.1 | F | <i>Clostridiales</i>      | Family XI                    | <i>Fingoldia</i> sp.              | 2 | 2 |
| DQ802363.1 | F | <i>Clostridiales</i>      | <i>Lachnospiraceae</i>       | <i>Blautia</i> sp.                | 2 | 2 |
| GQ175428.1 | F | <i>Clostridiales</i>      | <i>Ruminococcaceae</i>       | uncultured bacterium              | 2 | 2 |
| EU778851.1 | F | <i>Clostridiales</i>      | <i>Ruminococcaceae</i>       | <i>Subdoligranulum</i> sp.        | 2 | 2 |
| GQ133038.1 | F | <i>Lactobacillales</i>    | <i>Enterococcaceae</i>       | <i>Enterococcus</i> sp.           | 2 | 4 |
| JQ448431.1 | F | <i>Lactobacillales</i>    | <i>Streptococcaceae</i>      | <i>Streptococcus</i> sp.          | 3 | 1 |
| JQ460192.1 | B | <i>Bacteroidales</i>      | <i>Prevotellaceae</i>        | <i>Prevotella</i> sp.             | 3 | 3 |
| M58833.1   | F | <i>Lactobacillales</i>    | <i>Lactobacillaceae</i>      | <i>Pediococcus acidilactici</i>   | 3 | 1 |

|                 |   |                   |                    |                                         |   |   |
|-----------------|---|-------------------|--------------------|-----------------------------------------|---|---|
| HG799951.1      | F | Bacillales        | Staphylococcaceae  | <i>Staphylococcus epidermidis</i>       | 3 | 3 |
| JF235878.1      | A | Micrococcales     | Microbacteriaceae  | <i>Naasia</i> sp.                       | 3 | 3 |
| JQ680457.1      | A | Corynebacteriales | Corynebacteriaceae | <i>Corynebacterium</i> sp. DYS15        | 3 | 3 |
| GQ379595.1      | P | Xanthomonadales   | Xanthomonadaceae   | <i>Stenotrophomonas</i> sp.             | 3 | 4 |
| AB787271.1      | B | Bacteroidales     | Bacteroidaceae     | <i>Bacteroides</i> sp. UasXn-3          | 3 | 3 |
| AOTI010230528.6 | B | Flavobacteriales  | Flavobacteriaceae  | <i>Chryseobacterium Triticum urartu</i> | 3 | 3 |
| JF109069.1      | F | Bacillales        | Staphylococcaceae  | <i>Staphylococcus</i> sp.               | 3 | 3 |
| JX464212.1      | F | Bacillales        | Paenibacillaceae   | <i>Paenibacillus</i> sp. BJC15-C21      | 3 | 3 |
| HQ778412.1      | B | Bacteroidales     | Bacteroidaceae     | <i>Bacteroides</i> sp.                  | 3 | 2 |
| FJ976590.1      | P | Enterobacteriales | Enterobacteriaceae | <i>Enterobacter</i> sp. LCR81           | 3 | 3 |
| KF178309.1      | F | Lactobacillales   | Lactobacillaceae   | <i>Pediococcus pentosaceus</i>          | 3 | 3 |
| HQ703879.1      | F | Lactobacillales   | Carnobacteriaceae  | <i>Alkalibacterium</i> sp.              | 3 | 3 |
| FJ950694.1      | P | Enterobacteriales | Enterobacteriaceae | <i>Escherichia coli</i>                 | 3 | 3 |
| JF164165.1      | F | Bacillales        | Staphylococcaceae  | <i>Staphylococcus</i> sp.               | 3 | 3 |
| KC463799.1      | P | Enterobacteriales | Enterobacteriaceae | <i>Klebsiella</i> sp.                   | 3 | 3 |
| JF146381.1      | F | Lactobacillales   | Streptococcaceae   | <i>Streptococcus</i> sp.                | 3 | 3 |
| AM900778.1      | F | Bacillales        | Paenibacillaceae   | <i>Paenibacillus</i> sp. PA215          | 3 | 3 |
| CBVB010000006   | B | Bacteroidales     | Bacteroidaceae     | bacterium MS4                           | 3 | 3 |
| AB013258.1      | P | Neisseriales      | Neisseriaceae      | uncultured beta proteobacterium         | 3 | 3 |



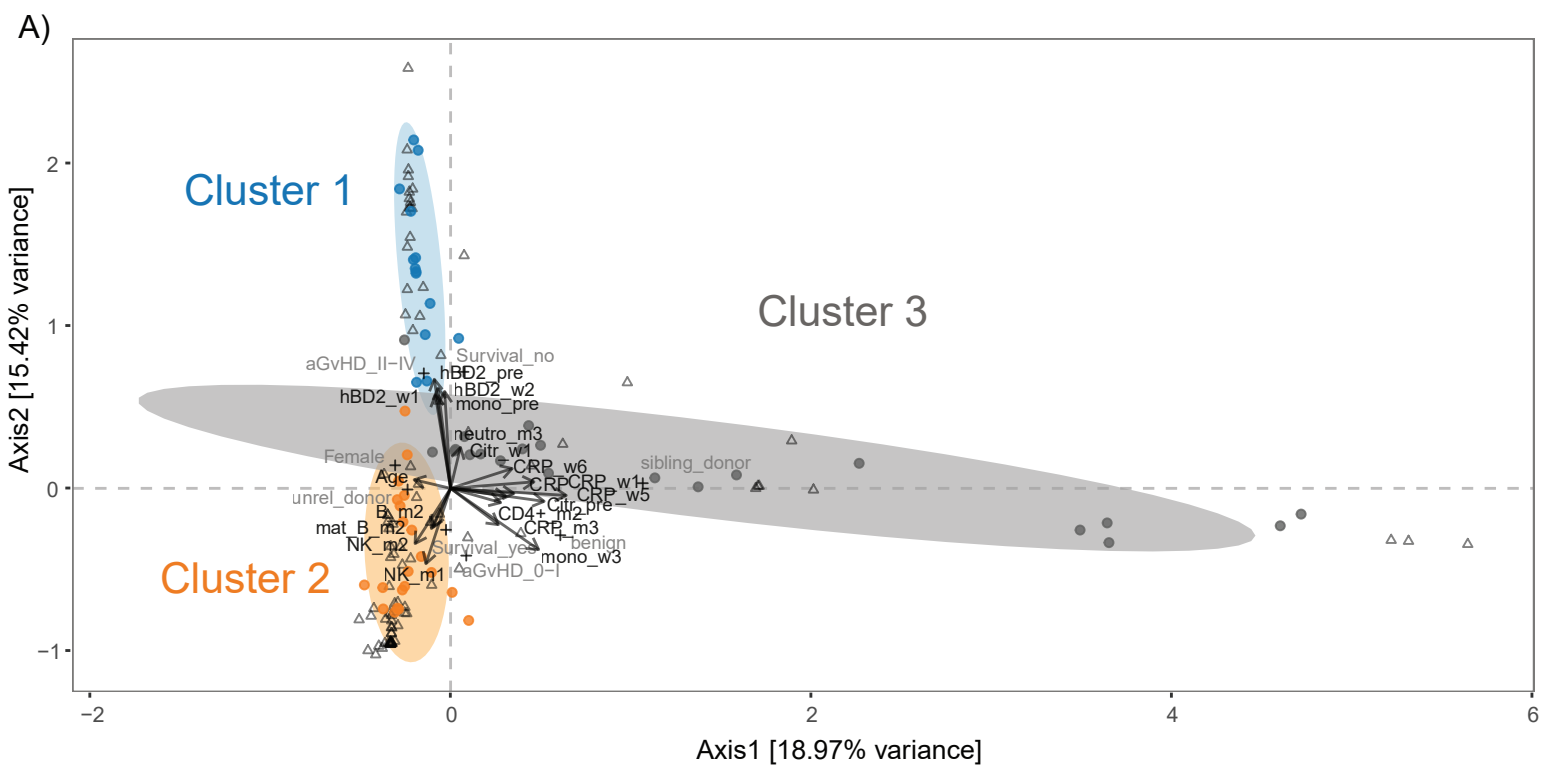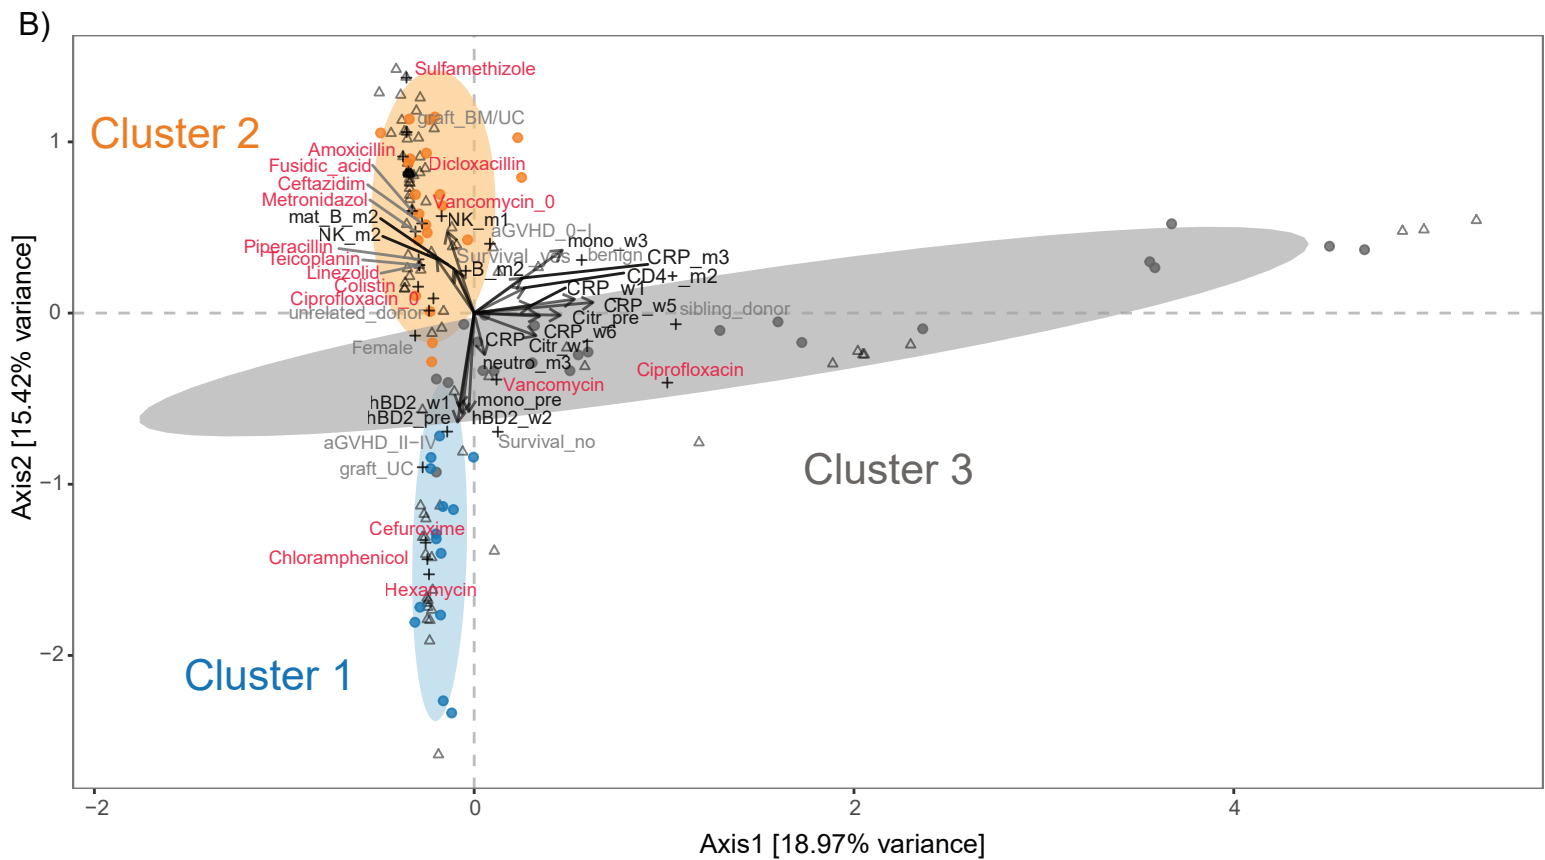

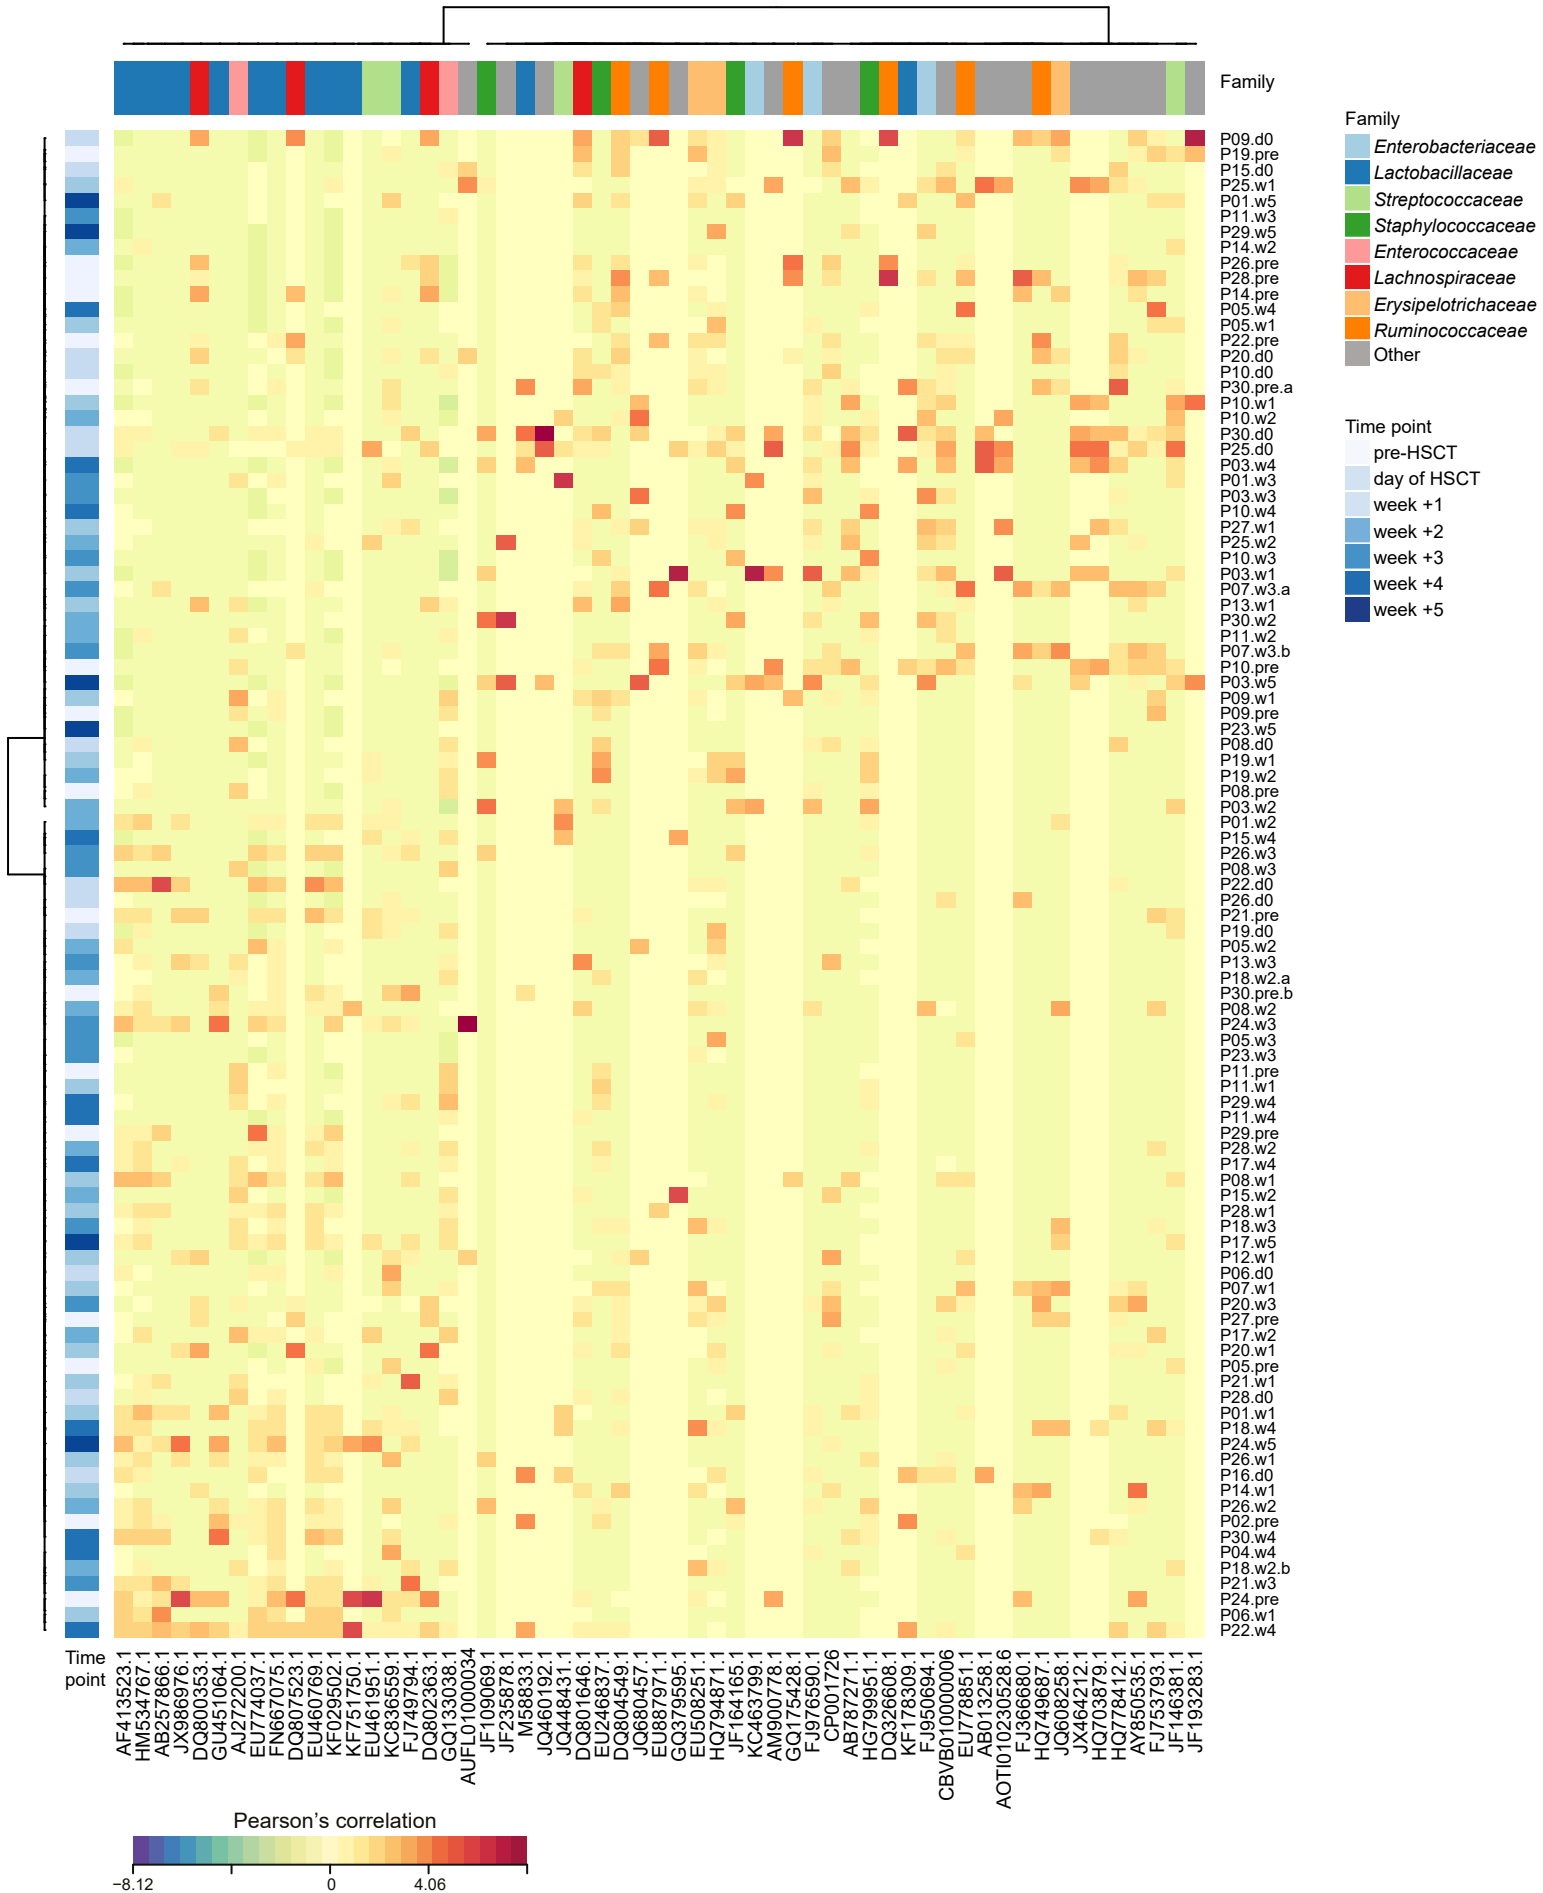

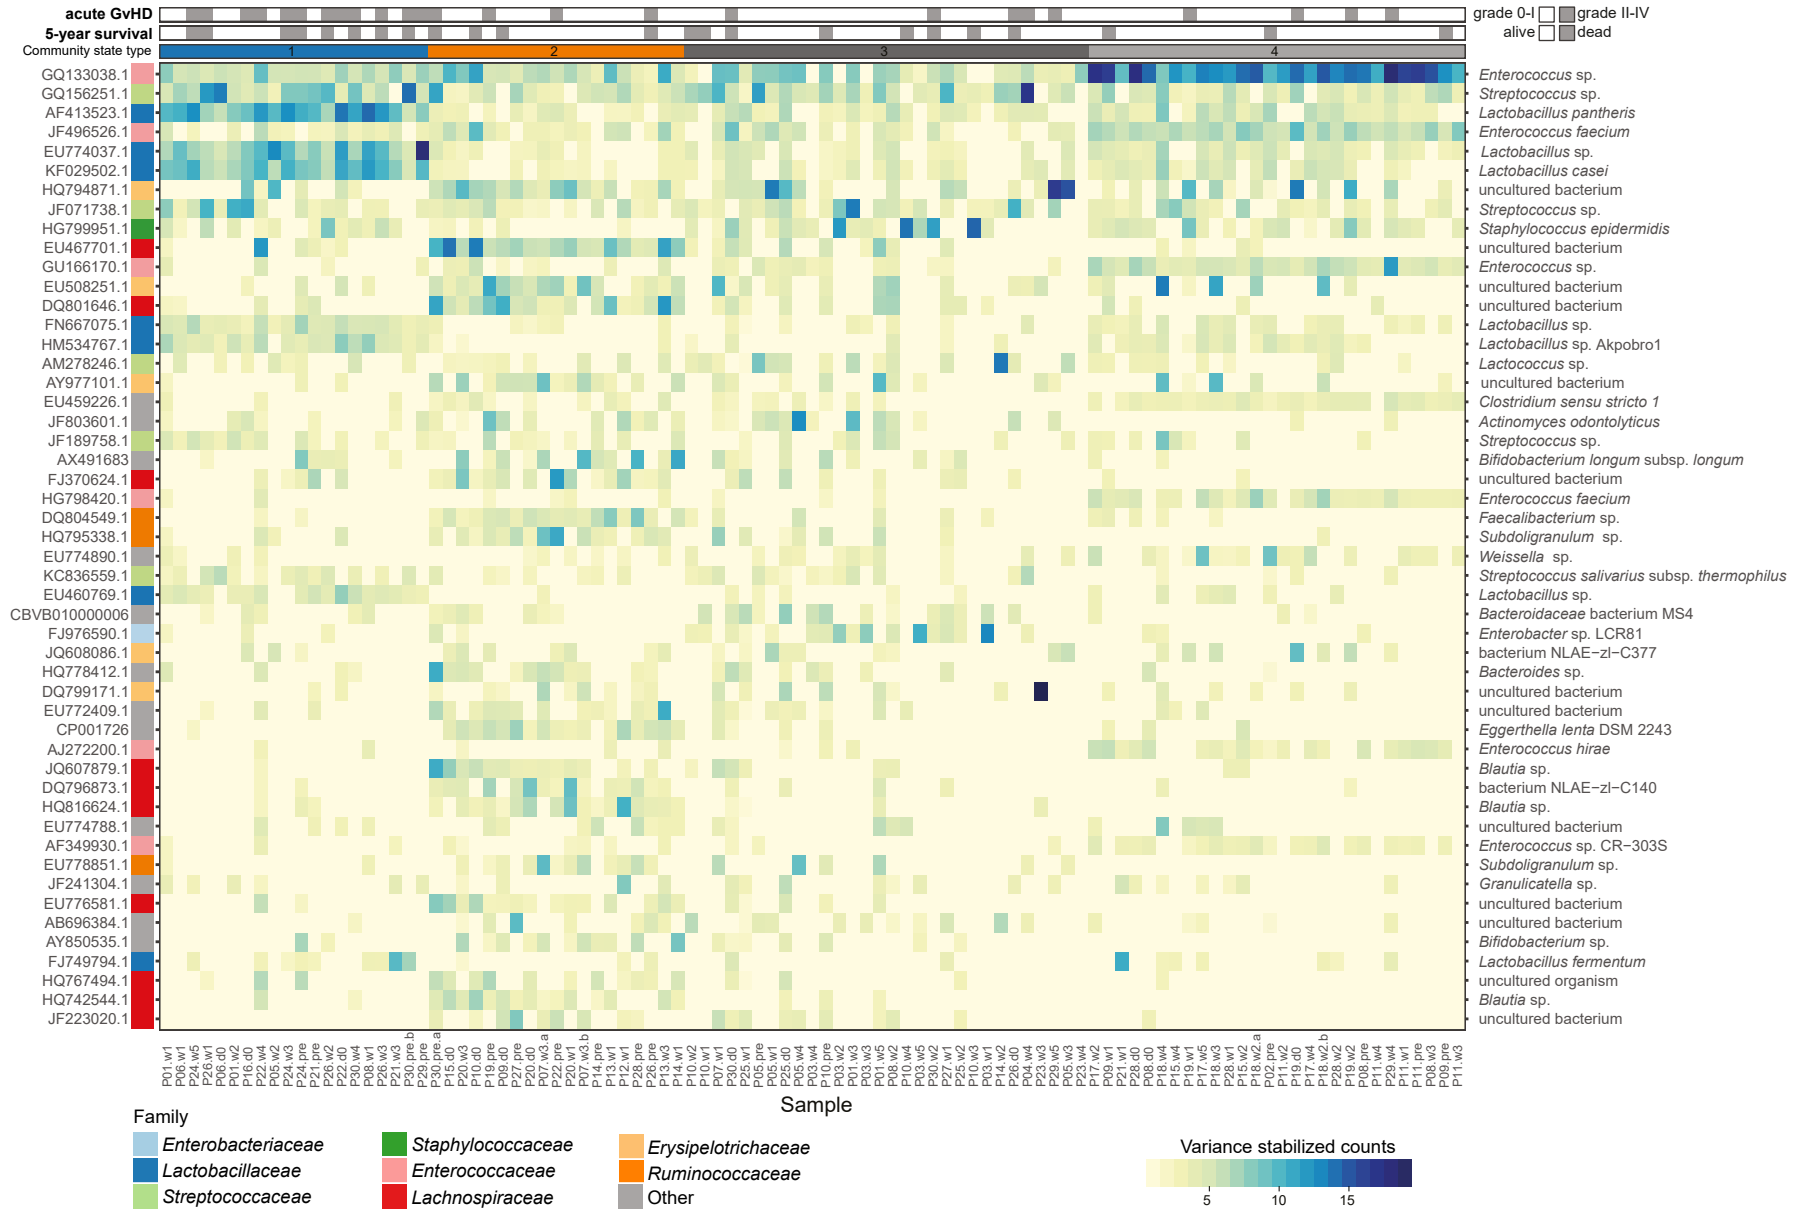



Patient 16

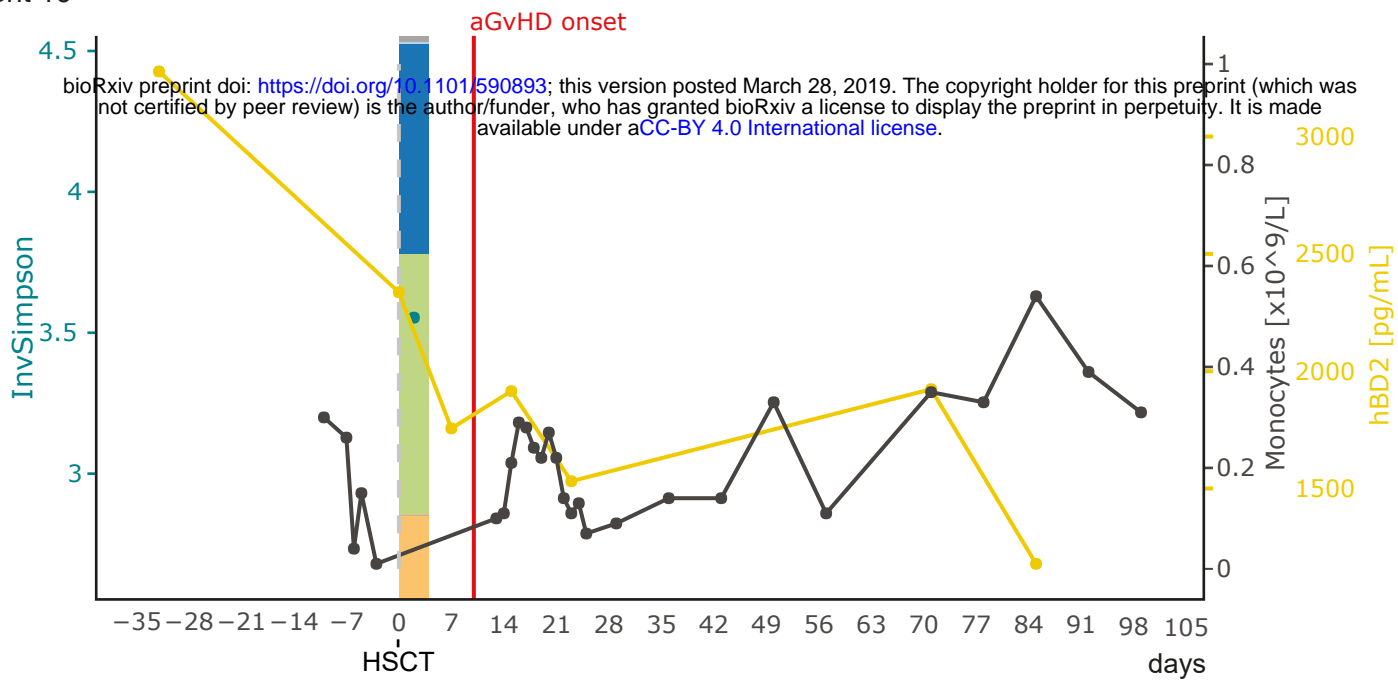

Patient 22

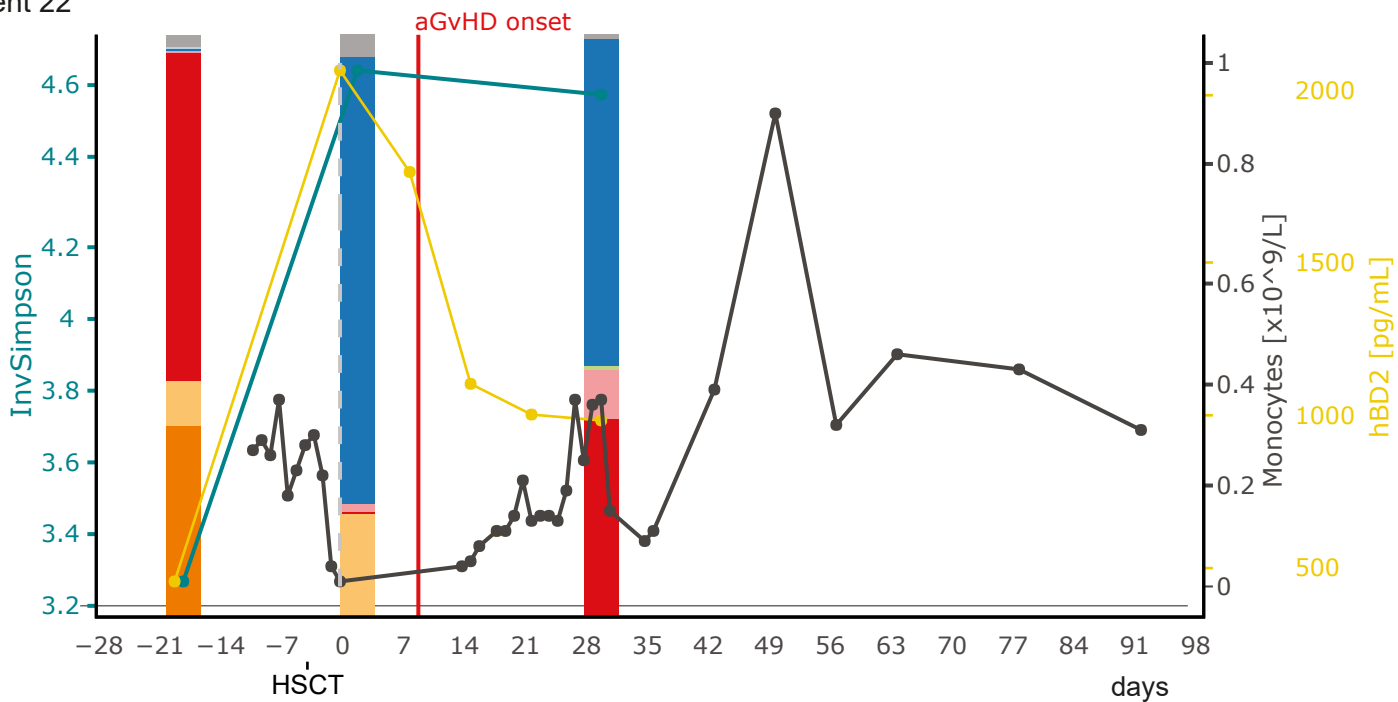

Patient 29

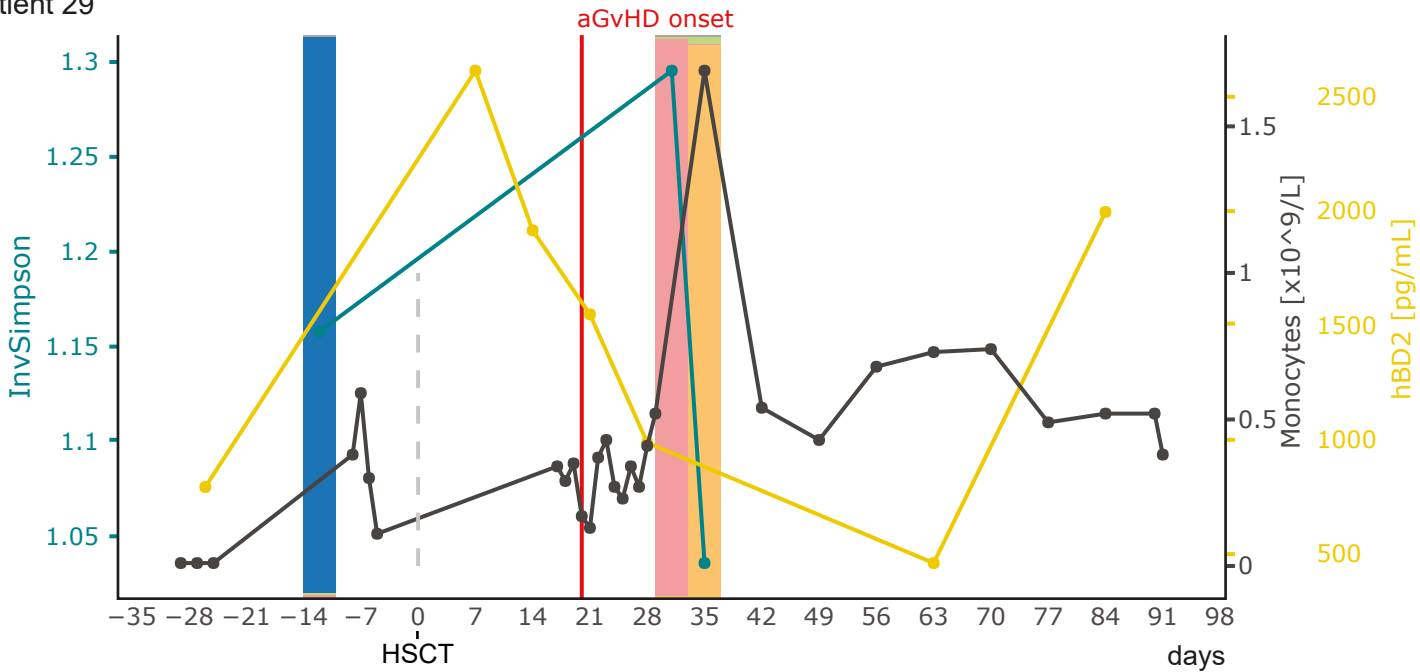

Family

- |                           |                          |                            |
|---------------------------|--------------------------|----------------------------|
| <i>Enterobacteriaceae</i> | <i>Staphylococcaceae</i> | <i>Erysipelotrichaceae</i> |
| <i>Lactobacillaceae</i>   | <i>Enterococcaceae</i>   | <i>Ruminococcaceae</i>     |
| <i>Streptococcaceae</i>   | <i>Lachnospiraceae</i>   | Other                      |

Our results suggest that a high *Lactobacillaceae* abundance prior to the onset of aGvHD may point to a preventive effect, as these patients survived. A human clinical trial of *Lactobacillus rhamnosus* GG prebiotic gavage to HSCT patients at time of engraftment demonstrated no protection against GvHD [1]. This could mean that *Lactobacillaceae* may not play a key role in aGvHD development, at least not the particular *Lactobacillus rhamnosus* strain under the conditions used in this group of patients. However, the administered probiotic did not alter the abundance of *Lactobacillus* spp. in the patients' guts [1], suggesting that the strain was not able to establish and proliferate in the host environment in this situation. An intrinsic increase of *Lactobacillaceae* prior to aGvHD onset, as observed here, therefore might still play a role in reducing aGvHD. A recent study related to the use of a probiotic given to infants to prevent sepsis suggested that the time point of application of a specific *Lactobacillus* sp. strain as a synbiotic played a critical role in positive clinical outcomes [2]. Furthermore, a study on gut microbial immunomodulation emphasized the importance of characterizing bacteria at the strain-level, because individual strains can have different modulatory effects on the immune system [3]. Therefore, it would be of great interest to determine the identity and predicted function of the specific *Lactobacillus* spp. strains in our patients, and in particular, in those who exhibited an early high abundance of *Lactobacillus* spp., as compared with those who experienced an expansion of *Lactobacillus* spp. after aGvHD and who later died.

Interestingly, *Enterococcus* was not among the most relevant taxa identified by our multivariate analyses. Intestinal domination of *Enterococcus* spp. was not clearly associated with adverse outcomes in our subgroup of 30 patients, in contrast to previous findings [4–6]. It should be noted that these previous observations were made in adult allo-HSCT patients and were dependent on

the type and amount of antimicrobial treatment. In addition, to elucidate this discrepancy further, we are currently characterizing *Enterococcus* isolates from fecal samples of our patient group, to gain insight into bacterial strain-level differences.

### **Supplementary references**

1. Gorshein E, Wei C, Ambrosy S, Budney S, Vivas J, Shenkerman A, et al. *Lactobacillus rhamnosus* GG probiotic enteric regimen does not appreciably alter the gut microbiome or provide protection against GVHD after allogeneic hematopoietic stem cell transplantation. *Clin Transplant*. 2017;31:e12947. doi:10.1111/ctr.12947.
2. Panigrahi P, Parida S, Nanda NC, Satpathy R, Pradhan L, Chandel DiS, et al. A randomized synbiotic trial to prevent sepsis among infants in rural India. *Nature*. 2017;548:407–12. doi:10.1038/nature23480.
3. Geva-Zatorsky N, Sefik E, Kua L, Pisman L, Tan TG, Ortiz-Lopez A, et al. Mining the Human Gut Microbiota for Immunomodulatory Organisms. *Cell*. 2017;168:928–943.e11. doi:10.1016/j.cell.2017.01.022.
4. Shono Y, van den Brink MRM. Gut microbiota injury in allogeneic haematopoietic stem cell transplantation. *Nat Rev Cancer*. 2018. doi:10.1038/nrc.2018.10.
5. Taur Y, Xavier JB, Lipuma L, Ubeda C, Goldberg J, Gobourne a., et al. Intestinal Domination and the Risk of Bacteremia in Patients Undergoing Allogeneic Hematopoietic Stem Cell Transplantation. *Clin Infect Dis*. 2012;55:905–14. doi:10.1093/cid/cis580.
6. Holler E, Butzhammer P, Schmid K, Hundsrucker C, Koestler J, Peter K, et al. Metagenomic Analysis of the Stool Microbiome in Patients Receiving Allogeneic Stem Cell Transplantation: Loss of Diversity Is Associated with Use of Systemic Antibiotics and More Pronounced in Gastrointestinal Graft-versus-Host Disease. *Biol Blood Marrow Transplant*. 2014;20:640–5. doi:10.1016/j.bbmt.2014.01.030.
